# Supplementary material for: Modular construction of N-arylated amino acid esters enabled by a photoredox-catalyzed multicomponent reaction
Source: Royal Society of Chemistry journal article supplement (doi:10.1039/d3gc01633a), 2023-01-01
Supplement: d3gc01633a1.pdf [file d3gc01633a1.pdf]

*Supporting Information*

*for*

**A Modular construction of *N*-arylated Amino Acid Esters  
enabled by a Photoredox-catalyzed Multicomponent  
Reaction**

Qing Li, Hanhan sun, Fengying Yan, Yuanyuan Zhao, Yicheng Zhang, Chao Zhou,  
Man-yi Han, Hongji Li, Xianwei Sui\*

Key Laboratory of Green and Precise Synthetic Chemistry and Applications, Ministry of Education,  
School of Chemistry and Materials Science, Huaibei Normal University, Huaibei, Anhui 235000, P. R.  
China.

\*Corresponding authors' emails: suixw@chnu.edu.cn

## Table of Contents

|                                                      |         |
|------------------------------------------------------|---------|
| Materials and Methods .....                          | S3      |
| Experimental Data.....                               | S4      |
| Preparation of the substrates .....                  | S4      |
| Graphical supporting information.....                | S5      |
| Table S1 Optimization of the reaction condition..... | S6      |
| General Procedure for three components coupling..... | S7      |
| The scope of the Anilines.....                       | S7-S17  |
| The scope of the alkyl organicboronates.....         | S17-S25 |
| Application .....                                    | S26     |
| NMR Data.....                                        | S29     |
| References.....                                      | S68     |

## Materials and Methods

Nuclear magnetic resonance spectra were recorded on Bruker 400 and 600 MHz instruments internally referenced to tetramethylsilane (0.0 ppm) or residue of  $\text{CDCl}_3$  (7.26 ppm for  $^1\text{H}$ , and 77.00 ppm for  $^{13}\text{C}$ ) signal. The following abbreviations were used to explain multiplicities: s = singlet, d = doublet, t = triplet, q = quartet, m = multiplet, br = broad, c = complex. High-resolution mass spectra (HRMS) were conducted at Micromass Q-ToF instrument (ESI). All reagents were purchased at the highest commercial quality and used without further purification unless otherwise stated. All reactions were performed under an inert atmosphere of dry argon in dried glassware, unless otherwise stated. Solvents were distilled using standard techniques. Acetonitrile and dichloromethane were distilled over calcium hydride under an atmosphere of argon. Room temperature reactions were performed between 25-30 °C. The reactions that require heating were put in an oil bath with a temperature monitor. Kessil lamp (440 nm) was used as the light source.

# Experimental Data

## Preparation of substrates

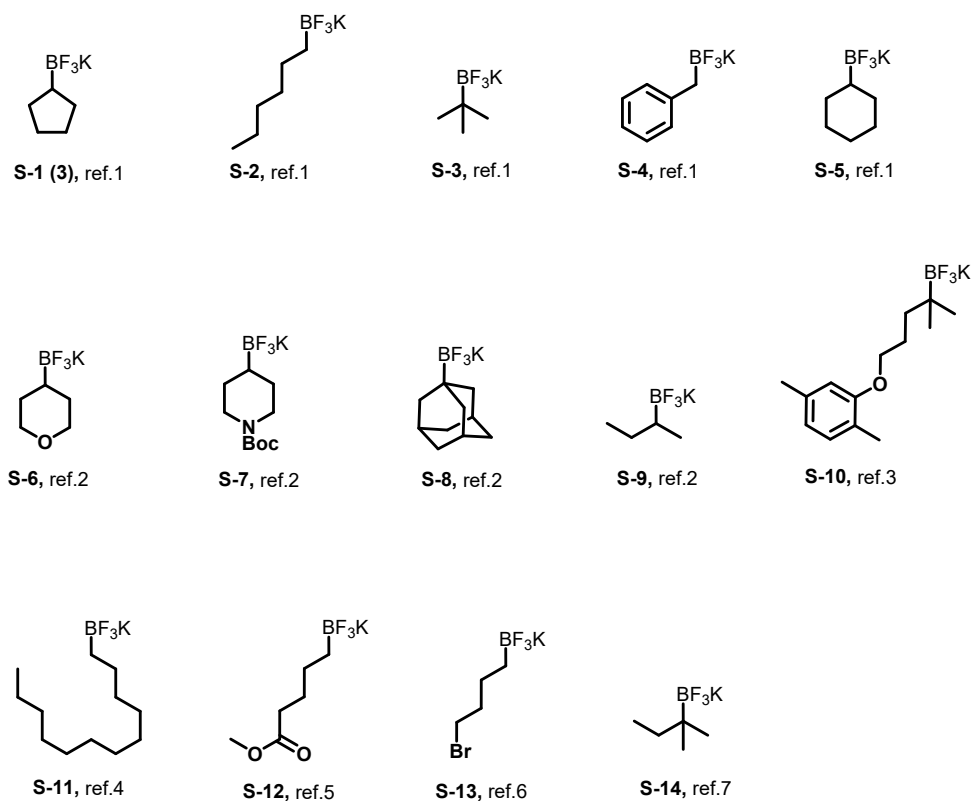

**Figure S1.** Syntheses of known substrates used in this study

**Grap**

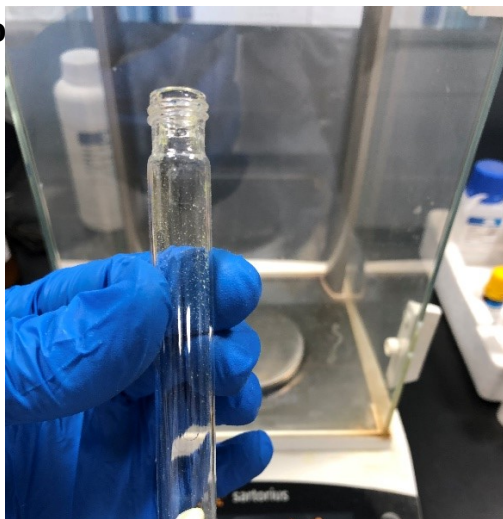

**(a)** Solid was put in the reaction tube.

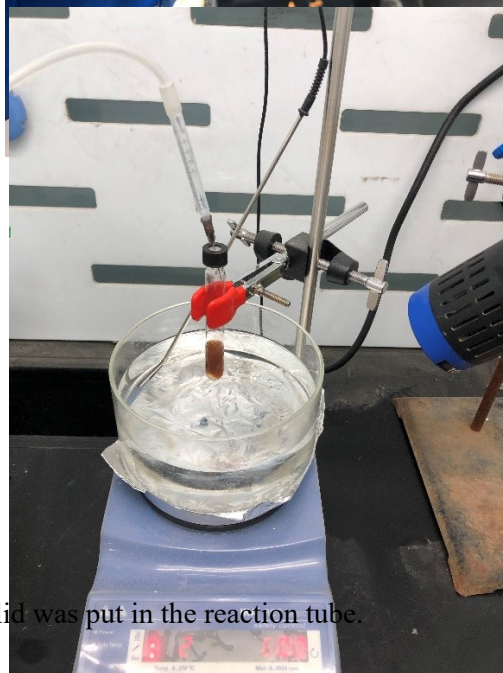

**(b)** Liquid was put in the tube under Ar.

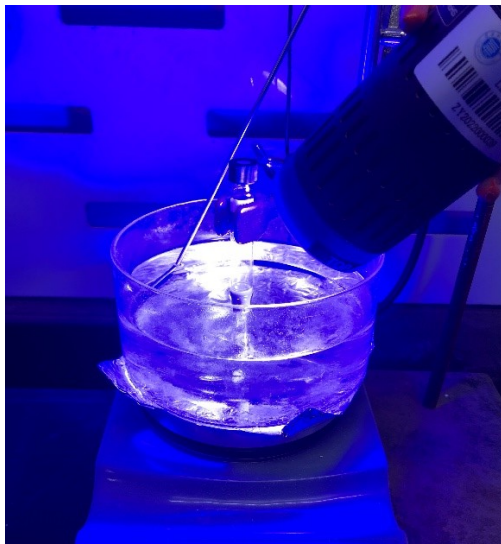

(c) The reaction occurs under the LED.

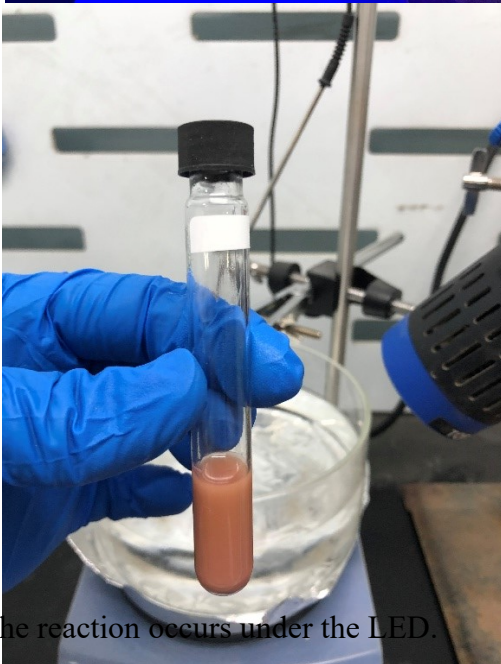

(d) The reaction completes after 18 h.

Table S1 Optimization of the reaction condition<sup>a</sup>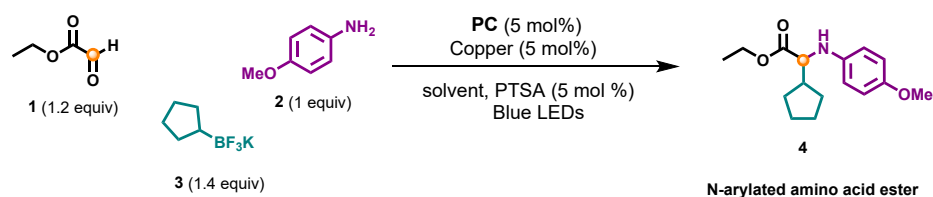

| Entry    | glyoxalate              | Solvent                 | PC          | Copper (5 mol%)                   | PTSA          | Temp.     | Time       | yield            |
|----------|-------------------------|-------------------------|-------------|-----------------------------------|---------------|-----------|------------|------------------|
| 1        | ethyl glyoxalate        | DCM                     | PC-I        | Cu(MeCN)BF <sub>4</sub>           | 5 mol%        | rt        | 18h        | 5%               |
| 2        | ethyl glyoxalate        | Dioxane                 | PC-I        | Cu(MeCN)BF <sub>4</sub>           | 5 mol%        | rt        | 18h        | 25%              |
| 3        | ethyl glyoxalate        | DMF                     | PC-I        | Cu(MeCN)BF <sub>4</sub>           | 5 mol%        | rt        | 18h        | 29%              |
| 4        | ethyl glyoxalate        | DMSO                    | PC-I        | Cu(MeCN)BF <sub>4</sub>           | 5 mol%        | rt        | 18h        | 0%               |
| <b>5</b> | <b>ethyl glyoxalate</b> | <b>CH<sub>3</sub>CN</b> | <b>PC-I</b> | <b>Cu(MeCN)BF<sub>4</sub></b>     | <b>5 mol%</b> | <b>rt</b> | <b>18h</b> | <b>87%</b>       |
| 6        | ethyl glyoxalate        | toluene                 | PC-I        | Cu(MeCN)BF <sub>4</sub>           | 5 mol%        | rt        | 18h        | 14%              |
| 7        | ethyl glyoxalate        | CH <sub>3</sub> CN      | PC-I        | Cu(MeCN)BF <sub>4</sub>           | 5 mol%        | rt        | 12h        | 61%              |
| 8        | ethyl glyoxalate        | CH <sub>3</sub> CN      | PC-I        | Cu(MeCN)BF <sub>4</sub>           | 5 mol%        | rt        | 24h        | 82%              |
| 9        | ethyl glyoxalate        | CH <sub>3</sub> CN      | PC-I        | Cu(MeCN)BF <sub>4</sub>           | 5 mol%        | 20 °C     | 18h        | 30%              |
| 10       | ethyl glyoxalate        | CH <sub>3</sub> CN      | PC-I        | Cu(MeCN)BF <sub>4</sub>           | 5 mol%        | 35 °C     | 18h        | 68%              |
| 11       | ethyl glyoxalate        | CH <sub>3</sub> CN      | PC-I        | Cu(OTf) <sub>2</sub>              | 5 mol%        | rt        | 18h        | 12%              |
| 12       | ethyl glyoxalate        | CH <sub>3</sub> CN      | PC-I        | Cu(MeCN)PF <sub>6</sub>           | 5 mol%        | rt        | 18h        | 43%              |
| 13       | ethyl glyoxalate        | CH <sub>3</sub> CN      | PC-I        | Cu(MeCN)BF <sub>4</sub>           | 10 mol%       | rt        | 18h        | 88%              |
| 14       | ethyl glyoxalate        | CH <sub>3</sub> CN      | PC-I        | Cu(MeCN)BF <sub>4</sub>           | 20 mol%       | rt        | 18h        | 79%              |
| 15       | ethyl glyoxalate        | CH <sub>3</sub> CN      | PC-I        | Cu(MeCN)BF <sub>4</sub>           | -             | rt        | 18h        | 55%              |
| 16       | ethyl glyoxalate        | CH <sub>3</sub> CN      | PC-I        | Cu(MeCN)BF <sub>4</sub> (10 mol%) | -             | rt        | 18h        | 64%              |
| 17       | ethyl glyoxalate        | CH <sub>3</sub> CN      | PC-I        | -                                 | 5 mol%        | rt        | 18h        | 39%              |
| 18       | ethyl glyoxalate        | CH <sub>3</sub> CN      | PC-I        | -                                 | 10 mol%       | rt        | 18h        | 51%              |
| 19       | ethyl glyoxalate        | CH <sub>3</sub> CN      | PC-I        | NaBF <sub>4</sub> (10 mol%)       | 5 mol%        | rt        | 18h        | 40%              |
| 20       | ethyl glyoxalate        | CH <sub>3</sub> CN      | PC-I        | NaBF <sub>4</sub> (20 mol%)       | 5 mol%        | rt        | 18h        | 37%              |
| 21       | benzaldehyde            | CH <sub>3</sub> CN      | PC-I        | Cu(MeCN)BF <sub>4</sub>           | 5 mol%        | rt        | 18h        | 13% <sup>b</sup> |
| 22       | cyclohexylformaldehyde  | CH <sub>3</sub> CN      | PC-I        | Cu(MeCN)BF <sub>4</sub>           | 5 mol%        | rt        | 18h        | 0%               |
| 23       | hexyl aldehyde          | CH <sub>3</sub> CN      | PC-I        | Cu(MeCN)BF <sub>4</sub>           | 5 mol%        | rt        | 18h        | 0%               |

<sup>a</sup>Reaction condition: **2** (0.2 mmol), **1** (1.2 equiv), **3** (1.4 equiv), 9-Mesityl-10-methylacridinium perchlorate (PC-I) (5 mol%), Cu(MeCN)BF<sub>4</sub> (5 mol%) and PTSA in MeCN (2.0 mL) at room temperature under Ar and Blue LEDs irradiation. isolated yields. PTSA = *p*-tolylsulfonicacid. <sup>b</sup>corresponding product.

## General Procedure for the Three-Components Coupling

9-mesityl-10-methylacridinium perchlorate (4.1 mg, 0.0100 mmol, 5 %), *p*-tolylsulfonicacid (1.7 mg, 0.0100 mmol, 5 %), Cu(MeCN)BF<sub>4</sub> (3.1 mg, 0.0100 mmol, 5 %), aniline (0.200 mmol, 1.0 equiv.) and alkyltrifluoroborate (0.28 mmol, 1.4 equiv.) were added to a Schlenk tube, and the mixture was degassed under vacuum and purged with argon for three times at room temperature. MeCN (2.0 ml) and aldehyde (0.240 mmol, 1.2 equiv.) were added and the mixture was stirred for 5 mins at room temperature before being stirred for 18 h above the LEDs at room temperature. The mixture was poured into water (20 mL) and extracted with ethyl acetate (3×15 ml). The organic layer was washed with brine (15 mL), dried over Na<sub>2</sub>SO<sub>4</sub>, filtered and concentrated. The residue was then purified by column chromatography on silica gel to give the three-components coupling product (see compound 4 for gram-scale synthesis).

## Aniline Scopes of the Three-Components Coupling

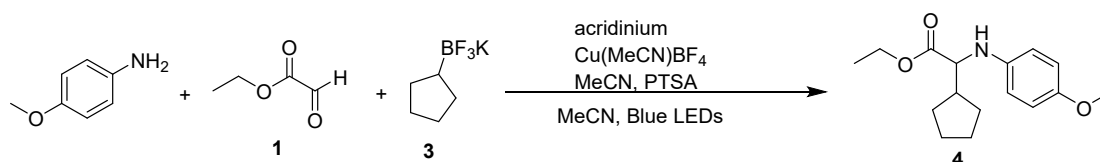

Compound 4 was synthesized following the **General Procedure for the three-components coupling**. The reaction of *p*-anisidine (24.6 mg, 0.200 mmol, 1.0 equiv.), 1 [50.0 mg (50 wt.% in toluene), 0.240 mmol, 1.2 equiv.], 3 (49.3 mg, 0.280 mmol, 1.4 equiv.), 9-mesityl-10-methylacridinium perchlorate (4.1 mg, 0.0100 mmol, 5 %), *p*-tolylsulfonicacid (1.7 mg, 0.0100 mmol, 5 %) and Cu(MeCN)BF<sub>4</sub> (3.1 mg, 0.0100 mmol, 5 %) in MeCN (2.0 mL) delivered 4 (48.2 mg, 87%) as a white gum after purification via silica gel column chromatography with 5% ethyl acetate/hexanes ( $R_f$  = 0.4, 5% ethyl acetate/hexanes). **<sup>1</sup>H NMR** (600 MHz, CDCl<sub>3</sub>)  $\delta$  6.75 (d,  $J$  = 9.0 Hz, 2 H), 6.60 (d,  $J$  = 9.0 Hz, 2 H), 4.15 (q,  $J$  = 7.2 Hz, 2 H), 3.84 (s, 1 H), 3.77 (d,  $J$  = 8.4



Hz, 1 H), 3.73 (s, 3 H), 2.25-2.16 (m, 1 H), 1.88-1.79 (m, 1 H), 1.75-1.62 (m, 3 H), 1.61-1.54 (m, 2 H), 1.51-1.41 (m, 2 H), 1.22 (t,  $J = 7.2$  Hz, 3 H); **<sup>13</sup>C NMR** (150 MHz, CDCl<sub>3</sub>)  $\delta$  174.4, 152.6, 141.5, 115.1, 114.8, 62.1, 60.7, 55.7, 43.2, 29.4, 29.0, 25.3, 25.1, 14.3; **HRMS (ESI<sup>+</sup>)** Calcd for C<sub>16</sub>H<sub>24</sub>NO<sub>3</sub> [M+H]<sup>+</sup> 278.1751, found 278.1750.

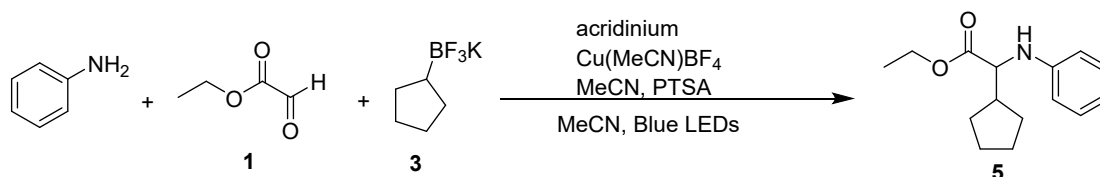

Compound **5** was synthesized following the **General Procedure for the three-components coupling**. The reaction of aniline (18.6 mg, 0.200 mmol, 1.0 equiv.), **1** [50.0 mg (50 wt.% in toluene), 0.240 mmol, 1.2 equiv.], **3** (49.3 mg, 0.280 mmol, 1.4 equiv.), 9-mesityl-10-methylacridinium perchlorate (4.1 mg, 0.0100 mmol, 5 %), *p*-tolylsulfonicacid (1.7 mg, 0.0100 mmol, 5 %) and Cu(MeCN)BF<sub>4</sub> (3.1 mg, 0.0100 mmol, 5 %) in MeCN (2.0 mL) delivered **5** (40.5 mg, 82%) as a white gum after purification via silica gel column chromatography with 5% ethyl acetate/hexanes ( $R_f = 0.45$ , 5% ethyl acetate/hexanes). **<sup>1</sup>H NMR** (600 MHz, CDCl<sub>3</sub>)  $\delta$  6.97 (t,  $J = 7.2$  Hz, 2 H), 6.72 (t,  $J = 7.8$  Hz, 1 H), 6.63 (d,  $J = 8.4$  Hz, 2 H), 4.29-3.93 (c, 3 H), 3.86 (d,  $J = 7.8$  Hz, 1 H), 2.32-2.18 (m, 1 H), 1.90-1.77 (m, 1 H), 1.76-1.61 (m, 3 H), 1.61-1.52 (m, 2 H), 1.51-1.41 (m, 2 H), 1.23 (t,  $J = 7.2$  Hz, 3 H); **<sup>13</sup>C NMR** (150 MHz, CDCl<sub>3</sub>)  $\delta$  174.2, 147.3, 129.2, 118.2, 113.5, 60.9, 60.8, 43.2, 29.3, 29.0, 25.3, 25.1, 14.3; **HRMS (ESI<sup>+</sup>)** Calcd for C<sub>15</sub>H<sub>22</sub>NO<sub>2</sub> [M+H]<sup>+</sup> 248.1645, found 248.1648.

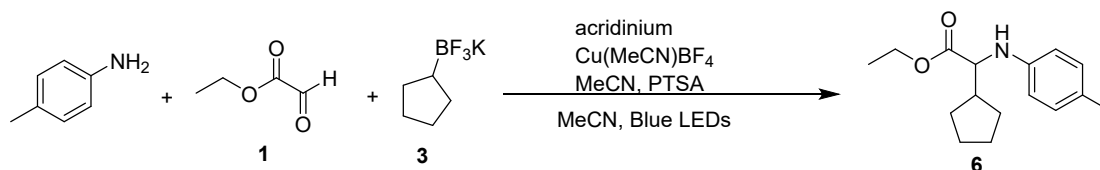

Compound **6** was synthesized following the **General Procedure for the three-components coupling**. The reaction of *p*-toluidine (21.4 mg, 0.200 mmol, 1.0 equiv.), **1** [50.0 mg (50 wt.% in toluene), 0.240 mmol, 1.2 equiv.], **3** (49.3 mg, 0.280 mmol, 1.4 equiv.), 9-mesityl-10-methylacridinium perchlorate (4.1 mg, 0.0100 mmol, 5 %), *p*-tolylsulfonicacid (1.7 mg, 0.0100 mmol, 5 %) and Cu(MeCN)BF<sub>4</sub> (3.1 mg, 0.0100 mmol, 5 %) in MeCN (2.0 mL) delivered **6** (46.1 mg, 88%) as a white gum after

purification via silica gel column chromatography with 5% ethyl acetate/hexanes ( $R_f = 0.45$ , 5% ethyl acetate/hexanes). **1H NMR** (600 MHz, CDCl<sub>3</sub>)  $\delta$  6.97 (d,  $J = 7.8$  Hz, 2 H), 6.56 (d,  $J = 8.4$  Hz, 2 H), 4.16 (q,  $J = 7.2$  Hz, 2 H), 4.09-3.86 (br, 1 H), 3.83 (d,  $J = 7.8$  Hz, 1 H), 2.27-2.19 (c, 4 H), 1.87-1.79 (m, 1 H), 1.76-1.61 (m, 3 H), 1.61-1.52 (m, 2 H), 1.51-1.41 (m, 2 H), 1.24 (t,  $J = 7.2$  Hz, 3 H); **13C NMR** (150 MHz, CDCl<sub>3</sub>)  $\delta$  174.3, 145.0, 129.7, 127.4, 113.7, 61.2, 60.7, 43.2, 29.4, 29.0, 25.3, 25.1, 20.3, 14.2; **HRMS (ESI<sup>+</sup>)** Calcd for C<sub>16</sub>H<sub>24</sub>NO<sub>2</sub> [M+H]<sup>+</sup> 262.1802, found 262.1795.

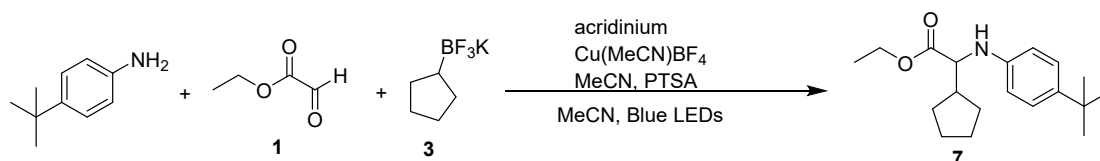

Compound **7** was synthesized following the **General Procedure for the three-components coupling**. The reaction of 4-*tert*-Butylaniline (29.8 mg, 0.200 mmol, 1.0 equiv.), **1** [50.0 mg (50 wt.% in toluene), 0.240 mmol, 1.2 equiv.], **3** (49.3 mg, 0.280 mmol, 1.4 equiv.), 9-mesityl-10-methylacridinium perchlorate (4.1 mg, 0.0100 mmol, 5%), *p*-tolylsulfonicacid (1.7 mg, 0.0100 mmol, 5%) and Cu(MeCN)BF<sub>4</sub> (3.1 mg, 0.0100 mmol, 5%) in MeCN (2.0 mL) delivered **7** (52.3 mg, 86%) as a white gum after purification via silica gel column chromatography with 5% ethyl acetate/hexanes ( $R_f = 0.45$ , 5% ethyl acetate/hexanes). **1H NMR** (600 MHz, CDCl<sub>3</sub>)  $\delta$  7.19 (d,  $J = 8.4$  Hz, 2 H), 6.59 (d,  $J = 9.0$  Hz, 2 H), 4.16 (q,  $J = 6.6$  Hz, 2 H), 4.12-3.91 (br, 1 H), 3.84 (d,  $J = 7.8$  Hz, 1 H), 2.29-2.19 (m, 1 H), 1.87-1.77 (m, 1 H), 1.76-1.61 (m, 3 H), 1.61-1.52 (m, 2 H), 1.51-1.40 (m, 2 H), 1.27 (s, 9 H), 1.24 (t,  $J = 6.6$  Hz, 3 H); **13C NMR** (150 MHz, CDCl<sub>3</sub>)  $\delta$  174.4, 144.9, 140.9, 126.0, 113.1, 61.0, 60.7, 43.2, 33.8, 31.4, 29.3, 29.0, 25.3, 25.1, 14.3; **HRMS (ESI<sup>+</sup>)** Calcd for C<sub>19</sub>H<sub>30</sub>NO<sub>2</sub> [M+H]<sup>+</sup> 304.2271, found 304.2258.

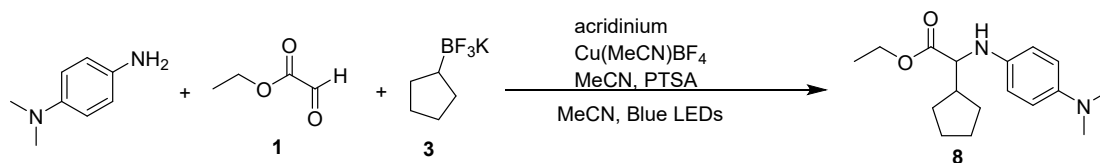

Compound **8** was synthesized following the **General Procedure for the three-components coupling**. The reaction of 4-(dimethylamino)benzenamine (27.2 mg,

0.200 mmol, 1.0 equiv.), **1** [50.0 mg (50 wt.% in toluene), 0.240 mmol, 1.2 equiv.], **3** (49.3 mg, 0.280 mmol, 1.4 equiv.), 9-mesityl-10-methylacridinium perchlorate (4.1 mg, 0.0100 mmol, 5 %), *p*-tolylsulfonicacid (1.7 mg, 0.0100 mmol, 5 %) and Cu(MeCN)BF<sub>4</sub> (3.1 mg, 0.0100 mmol, 5 %) in MeCN (2.0 mL) delivered **8** (39.6 mg, 68%) as a white gum after purification via silica gel column chromatography with 3% ethyl acetate/hexanes ( *R<sub>f</sub>* = 0.5, 5% ethyl acetate/hexanes). **1H NMR** (600 MHz, CDCl<sub>3</sub>) δ 6.70 (d, *J* = 8.4 Hz, 2 H), 6.62 (d, *J* = 7.8 Hz, 2 H), 4.14 (q, *J* = 6.6 Hz, 2 H), 3.76 (s, 2 H), 2.81 (s, 6 H), 2.25-2.16 (m, 1 H), 1.88-1.78 (m, 1 H), 1.75-1.60 (m, 3 H), 1.60-1.52 (m, 2 H), 1.51-1.40 (m, 2 H), 1.22 (t, *J* = 6.6 Hz, 3 H); **13C NMR** (150 MHz, CDCl<sub>3</sub>) δ 174.6, 144.6, 139.6, 115.6, 115.3, 62.2, 60.6, 43.2, 42.1, 29.4, 29.0, 25.4, 25.1, 14.3; **HRMS (ESI<sup>+</sup>)** Calcd for C<sub>17</sub>H<sub>27</sub>N<sub>2</sub>O<sub>2</sub> [M+H]<sup>+</sup> 291.2067, found 291.2071.

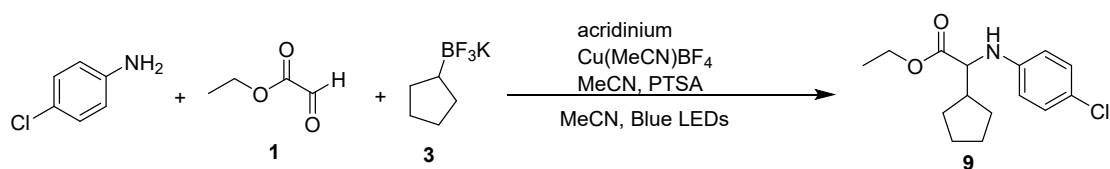

Compound **9** was synthesized following the **General Procedure for the three-components coupling**. The reaction of 4-chloroaniline (25.5 mg, 0.200 mmol, 1.0 equiv.), **1** [50.0 mg (50 wt.% in toluene), 0.240 mmol, 1.2 equiv.], **3** (49.3 mg, 0.280 mmol, 1.4 equiv.), 9-mesityl-10-methylacridinium perchlorate (4.1 mg, 0.0100 mmol, 5 %), *p*-tolylsulfonicacid (1.7 mg, 0.0100 mmol, 5 %) and Cu(MeCN)BF<sub>4</sub> (3.1 mg, 0.0100 mmol, 5 %) in MeCN (2.0 mL) delivered **9** (53.0 mg, 94%) as a white gum after purification via silica gel column chromatography with 3% ethyl acetate/hexanes ( *R<sub>f</sub>* = 0.5, 5% ethyl acetate/hexanes). **1H NMR** (600 MHz, CDCl<sub>3</sub>) δ 7.10 (d, *J* = 9.0 Hz, 2 H), 6.55 (d, *J* = 9.0 Hz, 2 H), 4.16 (q, *J* = 7.2 Hz, 2 H), 4.10 (s, 1 H), 3.80 (d, *J* = 7.8 Hz, 1 H), 2.28-2.18 (m, 1 H), 1.86-1.78 (m, 1 H), 1.76-1.62 (m, 3 H), 1.61-1.54 (m, 2 H), 1.49-1.39 (m, 2 H), 1.23 (t, *J* = 7.2 Hz, 3 H); **13C NMR** (150 MHz, CDCl<sub>3</sub>) δ 173.8, 145.9, 129.1, 122.8, 114.6, 61.0, 60.9, 43.1, 29.3, 29.0, 25.3, 25.1, 14.3; **HRMS (ESI<sup>+</sup>)** Calcd for C<sub>15</sub>H<sub>21</sub>ClNO<sub>2</sub> [M+H]<sup>+</sup> 282.1255, found 282.1234.

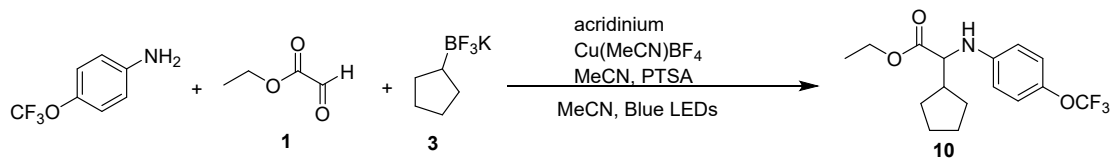

Compound **10** was synthesized following the **General Procedure for the three-components coupling**. The reaction of 4-(trifluoromethoxy)aniline (35.4 mg, 0.200 mmol, 1.0 equiv.), **1** [50.0 mg (50 wt.% in toluene), 0.240 mmol, 1.2 equiv.], **3** (49.3 mg, 0.280 mmol, 1.4 equiv.), 9-mesityl-10-methylacridinium perchlorate (4.1 mg, 0.0100 mmol, 5 %), *p*-tolylsulfonicacid (1.7 mg, 0.0100 mmol, 5 %) and Cu(MeCN)BF<sub>4</sub> (3.1 mg, 0.0100 mmol, 5 %) in MeCN (2.0 mL) delivered **10** (53.8 mg, 81%) as a white gum after purification via silica gel column chromatography with 6% ethyl acetate/hexanes ( *R<sub>f</sub>* = 0.3, 5% ethyl acetate/hexanes). **1H NMR** (600 MHz, CDCl<sub>3</sub>) δ 7.01 (d, *J* = 8.4 Hz, 2 H), 6.58 (d, *J* = 9.0 Hz, 2 H), 4.43-3.97 (c, 3 H), 3.81 (d, *J* = 7.8 Hz, 1 H), 2.32-2.17 (m, 1 H), 1.90-1.78 (m, 1 H), 1.76-1.62 (m, 3 H), 1.62-1.53 (m, 2 H), 1.50-1.39 (m, 2 H), 1.24 (t, *J* = 6.6 Hz, 3 H); **13C NMR** (150 MHz, CDCl<sub>3</sub>) δ 173.8, 146.1, 141.0, 122.4, 113.8, 61.0, 60.9, 43.1, 29.3, 29.0, 25.3, 25.1, 14.2; **19F NMR** (565 MHz, CDCl<sub>3</sub>) δ -58.5; **HRMS (ESI<sup>+</sup>)** Calcd for C<sub>16</sub>H<sub>21</sub>F<sub>3</sub>NO<sub>3</sub> [M+H]<sup>+</sup> 332.1468, found 332.1474.

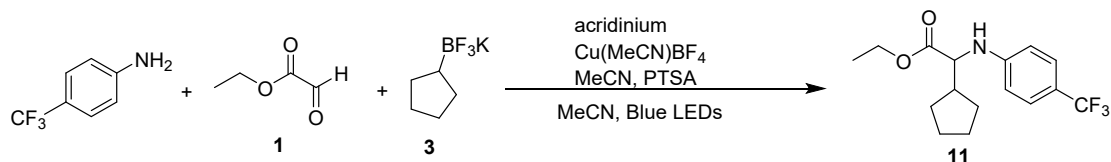

Compound **11** was synthesized following the **General Procedure for the three-components coupling**. The reaction of 4-(trifluoromethyl)aniline (32.2 mg, 0.200 mmol, 1.0 equiv.), **1** [50.0 mg (50 wt.% in toluene), 0.240 mmol, 1.2 equiv.], **3** (49.3 mg, 0.280 mmol, 1.4 equiv.), 9-mesityl-10-methylacridinium perchlorate (4.1 mg, 0.0100 mmol, 5 %), *p*-tolylsulfonicacid (1.7 mg, 0.0100 mmol, 5 %) and Cu(MeCN)BF<sub>4</sub> (3.1 mg, 0.0100 mmol, 5 %) in MeCN (2.0 mL) delivered **11** (49.8 mg, 75%) as a white gum after purification via silica gel column chromatography with 6% ethyl acetate/hexanes ( *R<sub>f</sub>* = 0.3, 5% ethyl acetate/hexanes). **1H NMR** (600 MHz, CDCl<sub>3</sub>) δ 7.39 (d, *J* = 8.4 Hz, 2 H), 6.63 (d, *J* = 9.0 Hz, 2 H), 4.42 (d, *J* = 9.0 Hz, 1 H), 4.18 (q, *J* = 7.2 Hz, 2 H), 3.90 (t, *J* = 7.8 Hz, 1 H), 2.33-2.21 (m, 1 H), 1.88-1.78 (m, 1

H), 1.78-1.70 (m, 1 H), 1.70-1.62 (m, 2 H), 1.62-1.55 (m, 2 H), 1.49-1.39 (m, 2 H), 1.25 (t,  $J = 7.2$  Hz, 3 H); **13C NMR** (150 MHz, CDCl<sub>3</sub>)  $\delta$  173.4, 149.8, 126.6 (q,  $J = 3.0$  Hz), 124.8 (q,  $J = 270.3$  Hz), 119.7 (q,  $J = 31.7$  Hz), 112.5, 61.1, 60.2, 43.1, 29.2, 29.0, 25.3, 25.0, 14.2; **19F NMR** (565 MHz, CDCl<sub>3</sub>)  $\delta$  -61.2; **HRMS (ESI<sup>+</sup>)** Calcd for C<sub>16</sub>H<sub>21</sub>F<sub>3</sub>NO<sub>3</sub> [M+H]<sup>+</sup> 332.1468, found 332.1465.

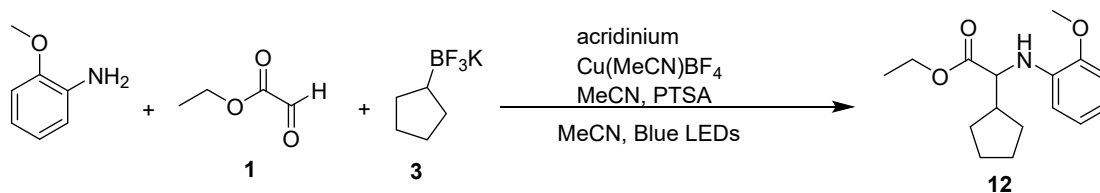

Compound **12** was synthesized following the **General Procedure for the three-components coupling**. The reaction of *o*-anisidine (24.6 mg, 0.200 mmol, 1.0 equiv.), **1** [50.0 mg (50 wt.% in toluene), 0.240 mmol, 1.2 equiv.], **3** (49.3 mg, 0.280 mmol, 1.4 equiv.), 9-mesityl-10-methylacridinium perchlorate (4.1 mg, 0.0100 mmol, 5 %), *p*-tolylsulfonic acid (1.7 mg, 0.0100 mmol, 5 %) and Cu(MeCN)BF<sub>4</sub> (3.1 mg, 0.0100 mmol, 5 %) in MeCN (2.0 mL) delivered **12** (38.3 mg, 69%) as a white gum after purification via silica gel column chromatography with 5% ethyl acetate/hexanes ( $R_f = 0.4$ , 5% ethyl acetate/hexanes). **1H NMR** (600 MHz, CDCl<sub>3</sub>)  $\delta$  6.82 (t,  $J = 7.8$  Hz, 1 H), 6.77 (d,  $J = 7.2$  Hz, 1 H), 6.67 (t,  $J = 7.8$  Hz, 1 H), 6.57 (d,  $J = 7.8$  Hz, 1 H), 4.88-4.54 (br, 1 H), 4.16 (q,  $J = 7.2$  Hz, 2 H), 3.90-3.81 (c, 4 H), 2.35-2.25 (m, 1 H), 1.92-1.83 (m, 1 H), 1.78-1.70 (m, 1 H), 1.70-1.62 (m, 2 H), 1.62-1.53 (m, 2 H), 1.52-1.43 (m, 2 H), 1.23 (t,  $J = 7.2$  Hz, 3 H); **13C NMR** (150 MHz, CDCl<sub>3</sub>)  $\delta$  174.2, 147.0, 137.3, 121.1, 117.2, 110.3, 109.7, 60.7, 60.6, 55.5, 43.1, 29.5, 29.1, 25.3, 25.1, 14.3; **HRMS (ESI<sup>+</sup>)** Calcd for C<sub>16</sub>H<sub>24</sub>NO<sub>3</sub> [M+H]<sup>+</sup> 278.1751, found 278.1752.

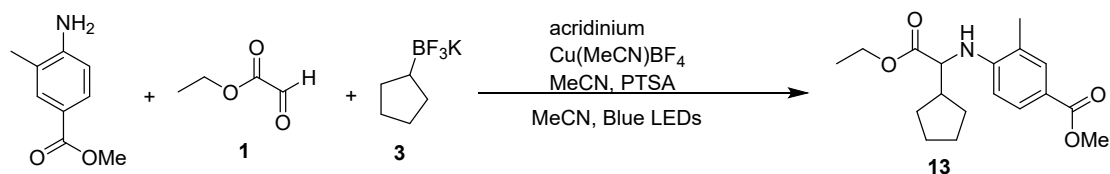

Compound **13** was synthesized following the **General Procedure for the three-components coupling**. The reaction of methyl 4-amino-3-methylbenzoate (33.0 mg, 0.200 mmol, 1.0 equiv.), **1** [50.0 mg (50 wt.% in toluene), 0.240 mmol, 1.2 equiv.], **3** (49.3 mg, 0.280 mmol, 1.4 equiv.), 9-mesityl-10-methylacridinium perchlorate (4.1 mg,

0.0100 mmol, 5 %), *p*-tolylsulfonicacid (1.7 mg, 0.0100 mmol, 5 %) and Cu(MeCN)BF<sub>4</sub> (3.1 mg, 0.0100 mmol, 5 %) in MeCN (2.0 mL) delivered **13** (45.4 mg, 71%) as a white gum after purification via silica gel column chromatography with 6% ethyl acetate/hexanes ( *R<sub>f</sub>* = 0.3, 5% ethyl acetate/hexanes). **1H NMR** (600 MHz, CDCl<sub>3</sub>) δ 7.36 (dd, *J* = 1.8, 7.8 Hz, 1 H), 7.25 (d, *J* = 1.8 Hz, 1 H), 7.10 (d, *J* = 7.8 Hz, 1 H), 4.25-4.13 (m, 2 H), 4.12-4.03 (br, 1 H), 4.01 (d, *J* = 7.8 Hz, 1 H), 3.87 (s, 3 H), 2.38-2.27 (m, 1 H), 2.24 (s, 3 H), 1.90-1.81 (m, 1 H), 1.80-1.73 (m, 1 H), 1.71-1.64 (m, 2 H), 1.62-1.58 (m, 2 H), 1.52-1.44 (m, 2 H), 1.26 (t, *J* = 7.2 Hz, 3 H); **13C NMR** (150 MHz, CDCl<sub>3</sub>) δ 174.1, 167.5, 145.4, 130.2, 129.0, 128.1, 119.3, 111.1, 61.0, 60.4, 51.9, 43.2, 29.3, 29.0, 25.3, 25.1, 17.7, 14.2; **HRMS (ESI<sup>+</sup>)** Calcd for C<sub>18</sub>H<sub>26</sub>NO<sub>4</sub> [M+H]<sup>+</sup> 320.1856, found 320.1859.

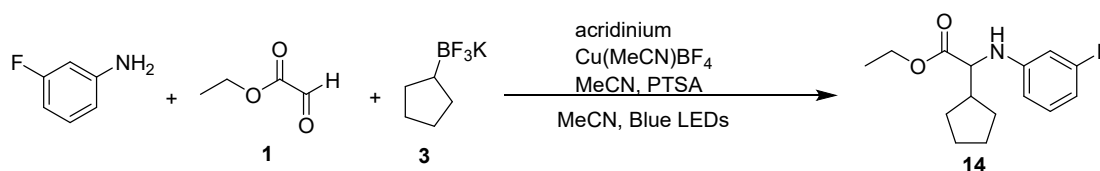

Compound **14** was synthesized following the **General Procedure for the three-components coupling**. The reaction of 3-fluoroaniline (22.2 mg, 0.200 mmol, 1.0 equiv.), **1** [50.0 mg (50 wt.% in toluene), 0.240 mmol, 1.2 equiv.], **3** (49.3 mg, 0.280 mmol, 1.4 equiv.), 9-mesityl-10-methylacridinium perchlorate (4.1 mg, 0.0100 mmol, 5 %), *p*-tolylsulfonicacid (1.7 mg, 0.0100 mmol, 5 %) and Cu(MeCN)BF<sub>4</sub> (3.1 mg, 0.0100 mmol, 5 %) in MeCN (2.0 mL) delivered **14** (44.7 mg, 84%) as a white gum after purification via silica gel column chromatography with 6% ethyl acetate/hexanes ( *R<sub>f</sub>* = 0.3, 5% ethyl acetate/hexanes). **1H NMR** (600 MHz, CDCl<sub>3</sub>) δ 7.08 (q, *J* = 8.4 Hz, 1 H), 6.44-6.36 (m, 2 H), 6.32 (d, *J* = 12.0 Hz, 1 H), 4.27-4.14 (c, 3 H), 3.82 (t, *J* = 8.4 Hz, 1 H), 2.30-2.18 (m, 1 H), 1.86-1.78 (m, 1 H), 1.77-1.63 (m, 3 H), 1.61-1.56 (m, 2 H), 1.49-1.39 (m, 2 H), 1.25 (t, *J* = 7.2 Hz, 3 H); **13C NMR** (150 MHz, CDCl<sub>3</sub>) δ 173.8, 164.0 (d, *J* = 243.1 Hz), 149.1 (d, *J* = 10.6 Hz), 130.3 (d, *J* = 10.6 Hz), 109.2, 104.6 (d, *J* = 21.1 Hz), 100.2 (d, *J* = 25.7 Hz); **19F NMR** (565 MHz, CDCl<sub>3</sub>) δ -112.7; **HRMS (ESI<sup>+</sup>)** Calcd for C<sub>15</sub>H<sub>21</sub>FNO<sub>2</sub> [M+H]<sup>+</sup> 266.1551, found 266.1556.

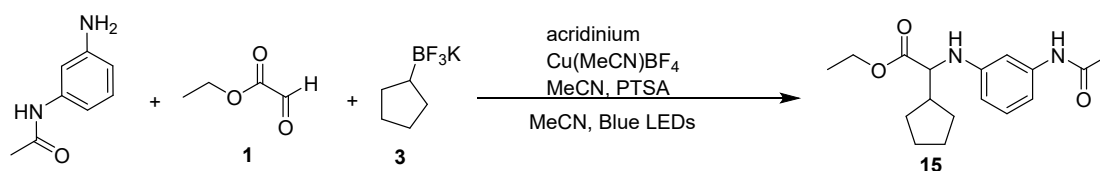

Compound **15** was synthesized following the **General Procedure for the three-components coupling**. The reaction of *N*-(3-aminophenyl)acetamide (30.0 mg, 0.200 mmol, 1.0 equiv.), **1** [50.0 mg (50 wt.% in toluene), 0.240 mmol, 1.2 equiv.], **3** (49.3 mg, 0.280 mmol, 1.4 equiv.), 9-mesityl-10-methylacridinium perchlorate (4.1 mg, 0.0100 mmol, 5 %), *p*-tolylsulfonicacid (1.7 mg, 0.0100 mmol, 5 %) and Cu(MeCN)BF<sub>4</sub> (3.1 mg, 0.0100 mmol, 5 %) in MeCN (2.0 mL) delivered **15** (42.7 mg, 70%) as a white gum after purification via silica gel column chromatography with 15% ethyl acetate/hexanes ( *R<sub>f</sub>* = 0.3, 20% ethyl acetate/hexanes). **1H NMR** (600 MHz, CDCl<sub>3</sub>) δ 7.14-7.00 (c, 3 H), 6.67 (d, *J* = 7.8 Hz, 1 H), 6.37 (d, *J* = 8.4 Hz, 1 H), 4.22-4.14 (c, 3 H), 3.80 (t, *J* = 7.8 Hz, 1 H), 2.17-2.10 (m, 1 H), 2.14 (s, 3 H), 1.86-1.77 (m, 1 H), 1.76-1.69 (m, 1 H), 1.69-1.63 (m, 2 H), 1.59-1.53 (m, 2 H), 1.48-1.41 (m, 2 H), 1.24 (t, *J* = 9.0 Hz, 3 H); **13C NMR** (150 MHz, CDCl<sub>3</sub>) δ 174.0, 168.1, 148.1, 138.9, 129.7, 109.3, 109.2, 104.9, 60.9, 60.7, 43.1, 29.3, 29.0, 25.3, 25.1, 24.8, 14.3; **HRMS (ESI<sup>+</sup>)** Calcd for C<sub>17</sub>H<sub>25</sub>N<sub>2</sub>O<sub>3</sub> [M+H]<sup>+</sup> 305.1860, found 305.1861.

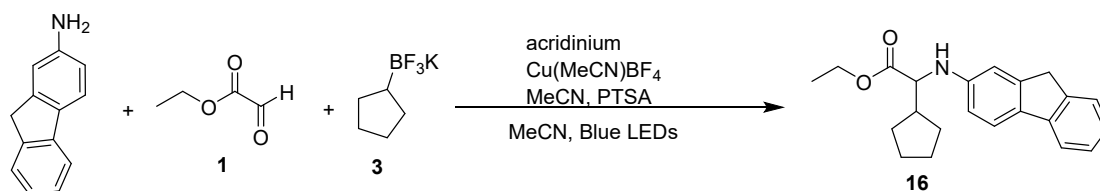

Compound **16** was synthesized following the **General Procedure for the three-components coupling**. The reaction of 9*H*-fluoren-2-amine (36.2 mg, 0.200 mmol, 1.0 equiv.), **1** [50.0 mg (50 wt.% in toluene), 0.240 mmol, 1.2 equiv.], **3** (49.3 mg, 0.280 mmol, 1.4 equiv.), 9-mesityl-10-methylacridinium perchlorate (4.1 mg, 0.0100 mmol, 5 %), *p*-tolylsulfonicacid (1.7 mg, 0.0100 mmol, 5 %) and Cu(MeCN)BF<sub>4</sub> (3.1 mg, 0.0100 mmol, 5 %) in MeCN (2.0 mL) delivered **16** (58.5 mg, 87%) as a white gum after purification via silica gel column chromatography with 5% ethyl acetate/hexanes ( *R<sub>f</sub>* = 0.45, 5% ethyl acetate/hexanes). **1H NMR** (600 MHz, CDCl<sub>3</sub>) δ 7.61 (d, *J* = 7.8 Hz, 1 H), 7.56 (d, *J* = 7.8 Hz, 1 H), 7.45 (d, *J* = 7.2 Hz, 1 H), 7.30 (t, *J* = 7.8 Hz, 1 H),

7.17 (t,  $J = 7.2$  Hz, 1 H), 6.84 (s, 1 H), 6.67 (d,  $J = 8.4$  Hz, 1 H), 4.34-4.03 (c, 3 H), 6.94 (d,  $J = 8.4$  Hz, 1 H), 3.80 (s, 2 H), 2.34-2.22 (m, 1 H), 1.92-1.82 (m, 1 H), 1.80-1.72 (m, 1 H), 1.72-1.64 (m, 2 H), 1.64-1.55 (m, 2 H), 1.54-1.45 (m, 2 H), 1.24 (t,  $J = 7.2$  Hz, 3 H); **<sup>13</sup>C NMR** (150 MHz, CDCl<sub>3</sub>)  $\delta$  174.2, 146.8, 145.1, 142.2, 142.1, 132.7, 126.6, 124.9, 124.7, 120.6, 118.5, 112.6, 110.1, 61.3, 60.8, 43.2, 36.9, 29.4, 29.1, 25.3, 25.1, 14.3; **HRMS (ESI<sup>+</sup>)** Calcd for C<sub>22</sub>H<sub>26</sub>NO<sub>2</sub> [M+H]<sup>+</sup> 336.1958, found 336.1959.

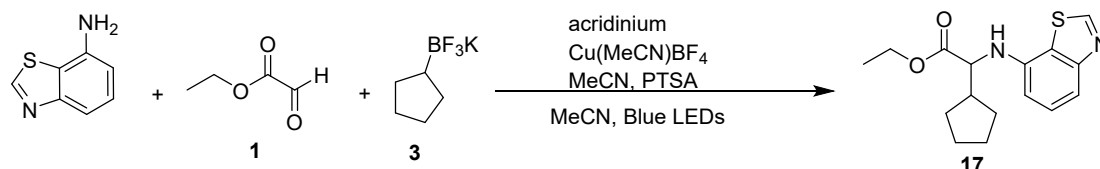

Compound **17** was synthesized following the **General Procedure for the three-components coupling**. The reaction of benzo[*d*]thiazol-7-amine (30.0 mg, 0.200 mmol, 1.0 equiv.), **1** [50.0 mg (50 wt.% in toluene), 0.240 mmol, 1.2 equiv.], **3** (49.3 mg, 0.280 mmol, 1.4 equiv.), 9-mesityl-10-methylacridinium perchlorate (4.1 mg, 0.0100 mmol, 5 %), *p*-tolylsulfonicacid (1.7 mg, 0.0100 mmol, 5 %) and Cu(MeCN)BF<sub>4</sub> (3.1 mg, 0.0100 mmol, 5 %) in MeCN (2.0 mL) delivered **17** (47.0 mg, 77%) as a white gum after purification via silica gel column chromatography with 5.5% ethyl acetate/hexanes (  $R_f = 0.5$ , 5% ethyl acetate/hexanes). **<sup>1</sup>H NMR** (600 MHz, CDCl<sub>3</sub>)  $\delta$  8.90 (s, 1 H), 7.68 (d,  $J = 8.4$  Hz, 1 H), 7.31 (d,  $J = 2.4$  Hz, 1 H), 6.84 (dd,  $J = 2.4, 9.0$  Hz, 1 H), 4.44-4.22 (br, 1 H), 4.22-4.13 (m, 2 H), 3.96 (d,  $J = 7.8$  Hz, 1 H), 2.34-2.25 (m, 1 H), 1.91-1.82 (m, 1 H), 1.80-1.73 (m, 1 H), 1.73-1.64 (m, 2 H), 1.64-1.59 (m, 2 H), 1.53-1.45 (m, 2 H), 1.25 (t,  $J = 7.2$  Hz, 3 H); **<sup>13</sup>C NMR** (150 MHz, CDCl<sub>3</sub>)  $\delta$  174.0, 154.4, 146.7, 122.0, 115.3, 105.5, 61.0, 43.2, 29.4, 29.1, 25.3, 25.1, 14.3; **HRMS (ESI<sup>+</sup>)** Calcd for C<sub>16</sub>H<sub>21</sub>N<sub>2</sub>O<sub>2</sub>S [M+H]<sup>+</sup> 305.1318, found 305.1314.

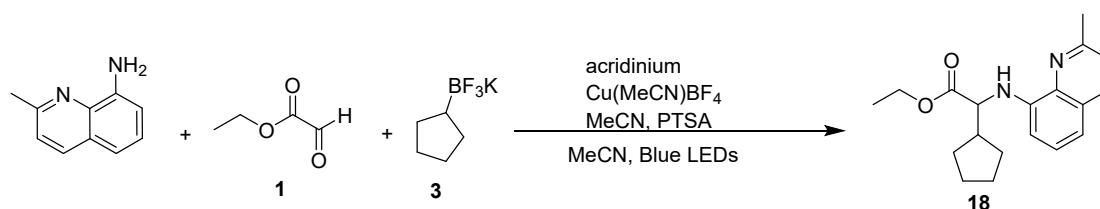

Compound **18** was synthesized following the **General Procedure for the three-components coupling**. The reaction of 2-methylquinolin-8-amine (31.6 mg, 0.200



mmol, 1.0 equiv.), **1** [50.0 mg (50 wt.% in toluene), 0.240 mmol, 1.2 equiv.], **3** (49.3 mg, 0.280 mmol, 1.4 equiv.), 9-mesityl-10-methylacridinium perchlorate (4.1 mg, 0.0100 mmol, 5 %), *p*-tolylsulfonicacid (1.7 mg, 0.0100 mmol, 5 %) and Cu(MeCN)BF<sub>4</sub> (3.1 mg, 0.0100 mmol, 5 %) in MeCN (2.0 mL) delivered **18** (42.0 mg, 67%) as a white gum after purification via silica gel column chromatography with 5.5% ethyl acetate/hexanes ( *R<sub>f</sub>* = 0.5, 5% ethyl acetate/hexanes). **1H NMR** (600 MHz, CDCl<sub>3</sub>) δ 7.92 (d, *J* = 7.8 Hz, 1 H), 7.30-7.19 (c, 1 H), 7.03 (d, *J* = 8.4 Hz, 1 H), 6.68 (d, *J* = 8.4 Hz, 1 H), 6.63 (d, *J* = 7.2 Hz, 1 H), 2.71 (s, 3 H), 2.56-2.44 (m, 1 H), 2.04-1.93 (m, 1 H), 1.86-1.78 (m, 1 H), 1.77-1.67 (m, 2 H), 1.65-1.53 (m, 4 H), 1.23 (t, *J* = 7.2 Hz, 3 H); **13C NMR** (150 MHz, CDCl<sub>3</sub>) δ 174.0, 155.8, 143.5, 137.6, 135.9, 126.6, 126.4, 122.2, 114.6, 105.3, 60.9, 60.7, 43.0, 29.6, 29.3, 25.4, 25.2, 14.3; **HRMS (ESI<sup>+</sup>)** Calcd for C<sub>19</sub>H<sub>25</sub>N<sub>2</sub>O<sub>2</sub> [M+H]<sup>+</sup> 313.1911, found 313.1909.

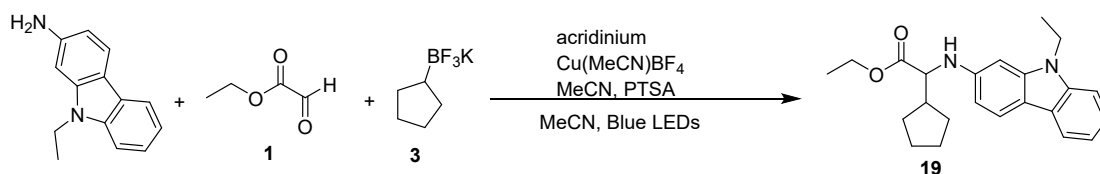

Compound **19** was synthesized following the **General Procedure for the three-components coupling**. The reaction of 9-ethyl-9H-carbazol-2-amine (42.0 mg, 0.200 mmol, 1.0 equiv.), **1** [50.0 mg (50 wt.% in toluene), 0.240 mmol, 1.2 equiv.], **3** (49.3 mg, 0.280 mmol, 1.4 equiv.), 9-mesityl-10-methylacridinium perchlorate (4.1 mg, 0.0100 mmol, 5 %), *p*-tolylsulfonicacid (1.7 mg, 0.0100 mmol, 5 %) and Cu(MeCN)BF<sub>4</sub> (3.1 mg, 0.0100 mmol, 5 %) in MeCN (2.0 mL) delivered **19** (65.0 mg, 89%) as a white gum after purification via silica gel column chromatography with 6% ethyl acetate/hexanes ( *R<sub>f</sub>* = 0.35, 5% ethyl acetate/hexanes). **1H NMR** (600 MHz, CDCl<sub>3</sub>) δ 8.10 (d, *J* = 7.8 Hz, 1 H), 7.42 (t, *J* = 7.2 Hz, 1 H), 7.38 (s, 1 H), 7.34 (d, *J* = 8.4 Hz, 1 H), 7.24 (d, *J* = 8.4 Hz, 1 H), 7.16 (t, *J* = 7.2 Hz, 1 H), 6.92 (d, *J* = 7.8 Hz, 1 H), 4.30 (q, *J* = 7.2 Hz, 2 H), 4.21-4.11 (m, 2 H), 4.11-3.99 (br, 1 H), 3.97 (d, *J* = 7.8 Hz, 1 H), 2.35-2.25 (m, 1 H), 1.97-1.88 (m, 1 H), 1.84-1.75 (m, 1 H), 1.75-1.66 (m, 2 H), 1.66-1.52 (m, 4 H), 1.39 (t, *J* = 7.8 Hz, 3 H), 1.23 (t, *J* = 7.2 Hz, 3 H); **13C NMR** (150 MHz, CDCl<sub>3</sub>) δ 174.8, 140.7, 140.3, 134.4, 125.3, 123.5, 122.6, 120.3, 117.9,

115.3, 109.1, 108.3, 104.6, 62.8, 60.6, 43.3, 37.5, 29.6, 29.1, 25.4, 25.2, 14.3, 13.8;

**HRMS (ESI<sup>+</sup>)** Calcd for C<sub>23</sub>H<sub>29</sub>N<sub>2</sub>O<sub>2</sub> [M+H]<sup>+</sup> 365.2224, found 365.2219.

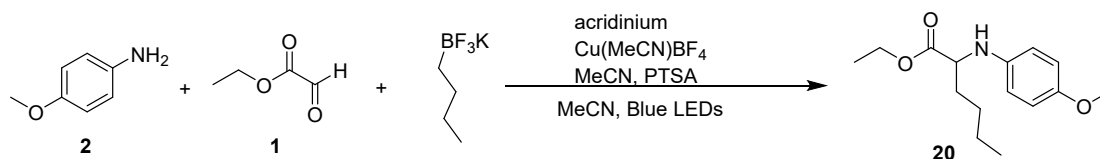

Compound **20** was synthesized following the **General Procedure for the three-components coupling**. The reaction of **2** (24.6 mg, 0.200 mmol, 1.0 equiv.), **1** [50.0 mg (50 wt.% in toluene), 0.240 mmol, 1.2 equiv.], butyltriethylborate (32.8 mg, 0.280 mmol, 1.4 equiv.), 9-mesityl-10-methylacridinium perchlorate (4.1 mg, 0.0100 mmol, 5 %), *p*-tolylsulfonicacid (1.7 mg, 0.0100 mmol, 5 %) and Cu(MeCN)BF<sub>4</sub> (3.1 mg, 0.0100 mmol, 5 %) in MeCN (2.0 mL) delivered **20** (52.7 mg, 99%) as a white gum after purification via silica gel column chromatography with 5% ethyl acetate/hexanes (*R<sub>f</sub>* = 0.4, 5% ethyl acetate/hexanes). **1H NMR** (600 MHz, CDCl<sub>3</sub>) δ 6.76 (d, *J* = 9.0 Hz, 2 H), 6.60 (d, *J* = 9.0 Hz, 2 H), 4.16 (q, *J* = 7.2 Hz, 2 H), 3.95 (t, *J* = 6.6 Hz, 1 H), 3.73 (s, 3 H), 1.85-1.69 (m, 2 H), 1.46-1.31 (m, 4 H), 1.23 (t, *J* = 7.2 Hz, 3 H), 0.91 (t, *J* = 7.2 Hz, 3 H); **13C NMR** (150 MHz, CDCl<sub>3</sub>) δ 174.6, 152.6, 141.1, 115.1, 114.8, 60.8, 57.8, 55.7, 32.9, 27.8, 22.4, 14.2, 13.9; **HRMS (ESI<sup>+</sup>)** Calcd for C<sub>15</sub>H<sub>24</sub>NO<sub>3</sub> [M+H]<sup>+</sup> 266.1751, found 266.1750.

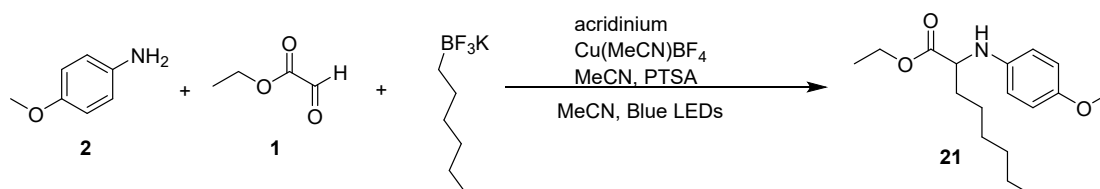

Compound **21** was synthesized following the **General Procedure for the three-components coupling**. The reaction of **2** (24.6 mg, 0.200 mmol, 1.0 equiv.), **1** [50.0 mg (50 wt.% in toluene), 0.240 mmol, 1.2 equiv.], hexyltriethylborate (53.8 mg, 0.280 mmol, 1.4 equiv.), 9-mesityl-10-methylacridinium perchlorate (4.1 mg, 0.0100 mmol, 5 %), *p*-tolylsulfonicacid (1.7 mg, 0.0100 mmol, 5 %) and Cu(MeCN)BF<sub>4</sub> (3.1 mg, 0.0100 mmol, 5 %) in MeCN (2.0 mL) delivered **21** (50.0 mg, 85%) as a white gum after purification via silica gel column chromatography with 5% ethyl acetate/hexanes (*R<sub>f</sub>* = 0.4, 5% ethyl acetate/hexanes). **1H NMR** (600 MHz, CDCl<sub>3</sub>) δ 6.76 (d, *J* = 8.4 Hz, 2 H), 6.60 (d, *J* = 8.4 Hz, 2 H), 4.16 (q, *J* = 7.2 Hz, 2 H), 3.95 (t, *J* = 6.6 Hz, 1 H),

3.84 (s, 1 H), 3.73 (s, 3 H), 1.86-1.68 (m, 2 H), 1.49-1.37 (m, 2 H), 1.37-1.25 (m, 6 H), 1.23 (t,  $J = 7.2$  Hz, 3 H), 0.88 (t,  $J = 6.6$  Hz, 3 H); **<sup>13</sup>C NMR** (150 MHz, CDCl<sub>3</sub>)  $\delta$  174.6, 152.6, 141.1, 115.0, 114.8, 60.8, 57.8, 55.7, 33.2, 31.6, 29.0, 25.6, 22.5, 14.2, 14.0; **HRMS (ESI<sup>+</sup>)** Calcd for C<sub>17</sub>H<sub>28</sub>NO<sub>3</sub> [M+H]<sup>+</sup> 294.2064, found 294.2065.

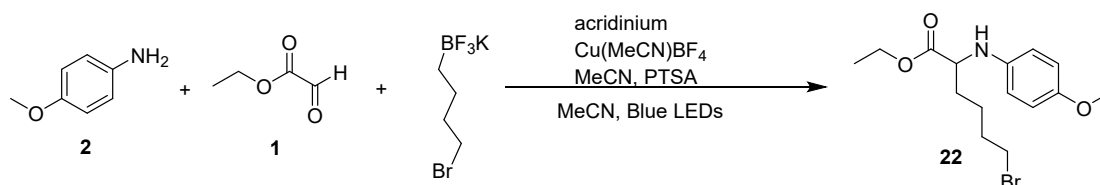

Compound **22** was synthesized following the **General Procedure for the three-components coupling**. The reaction of **2** (24.6 mg, 0.200 mmol, 1.0 equiv.), **1** [50.0 mg (50 wt.% in toluene), 0.240 mmol, 1.2 equiv.], (4-bromobutyl)trifluoroborate (67.8 mg, 0.280 mmol, 1.4 equiv.), 9-mesityl-10-methylacridinium perchlorate (4.1 mg, 0.0100 mmol, 5 %), *p*-tolylsulfonicacid (1.7 mg, 0.0100 mmol, 5 %) and Cu(MeCN)BF<sub>4</sub> (3.1 mg, 0.0100 mmol, 5 %) in MeCN (2.0 mL) delivered **22** (49.5 mg, 72%) as a white gum after purification via silica gel column chromatography with 5% ethyl acetate/hexanes (  $R_f = 0.4$ , 5% ethyl acetate/hexanes). **<sup>1</sup>H NMR** (600 MHz, CDCl<sub>3</sub>)  $\delta$  6.90 (d,  $J = 9.0$  Hz, 2 H), 6.81 (d,  $J = 9.0$  Hz, 2 H), 4.24 (t,  $J = 5.4$  Hz, 1 H), 4.13-3.99 (m, 2 H), 3.75 (s, 3 H), 3.43-3.34 (m, 1 H), 3.20-3.11 (m, 1 H), 2.14-2.04 (m, 1 H), 2.01-1.91 (m, 1 H), 1.86-1.77 (m, 1 H), 1.70-1.55 (m, 2 H), 1.55-1.45 (m, 1 H), 1.13 (t,  $J = 6.6$  Hz, 3 H); **<sup>13</sup>C NMR** (150 MHz, CDCl<sub>3</sub>)  $\delta$  173.2, 153.6, 145.5, 118.8, 114.3, 60.6, 60.3, 55.5, 48.1, 28.8, 25.6, 21.1, 14.2; **HRMS (ESI<sup>+</sup>)** Calcd for C<sub>15</sub>H<sub>23</sub>BrNO<sub>3</sub> [M+H]<sup>+</sup> 344.0856, found 344.0855.

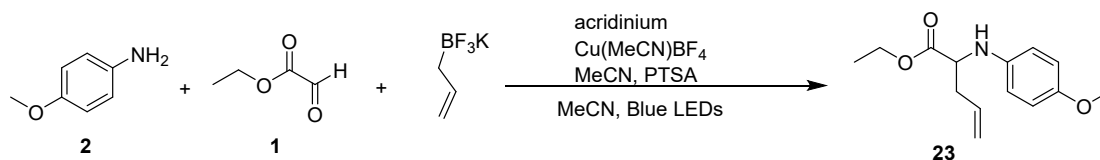

Compound **23** was synthesized following the **General Procedure for the three-components coupling**. The reaction of **2** (24.6 mg, 0.200 mmol, 1.0 equiv.), **1** [50.0 mg (50 wt.% in toluene), 0.240 mmol, 1.2 equiv.], allyltrifluoroborate (41.4 mg, 0.280 mmol, 1.4 equiv.), 9-mesityl-10-methylacridinium perchlorate (4.1 mg, 0.0100 mmol, 5 %), *p*-tolylsulfonicacid (1.7 mg, 0.0100 mmol, 5 %) and Cu(MeCN)BF<sub>4</sub> (3.1 mg, 0.0100 mmol, 5 %) in MeCN (2.0 mL) delivered **23** (43.0 mg, 86%) as a white gum

after purification via silica gel column chromatography with 5% ethyl acetate/hexanes ( $R_f = 0.4$ , 5% ethyl acetate/hexanes). **1H NMR** (600 MHz, CDCl<sub>3</sub>)  $\delta$  6.76 (d,  $J = 9.0$  Hz, 2 H), 6.60 (d,  $J = 9.0$  Hz, 2 H), 5.86-5.74 (m, 1 H), 5.24-5.11 (c, 2 H), 4.28-4.12 (m, 2 H), 4.05 (t,  $J = 6.6$  Hz, 1 H), 4.00-3.82 (br, 1 H), 3.74 (s, 3 H), 2.67-2.49 (m, 2 H), 1.24 (t,  $J = 7.2$  Hz, 3 H); **13C NMR** (150 MHz, CDCl<sub>3</sub>)  $\delta$  173.6, 152.7, 140.7, 132.9, 118.8, 115.2, 114.8, 61.0, 57.2, 55.7, 37.2, 14.2; **HRMS (ESI<sup>+</sup>)** Calcd for C<sub>14</sub>H<sub>20</sub>NO<sub>3</sub> [M+H]<sup>+</sup> 250.1438, found 250.1436.

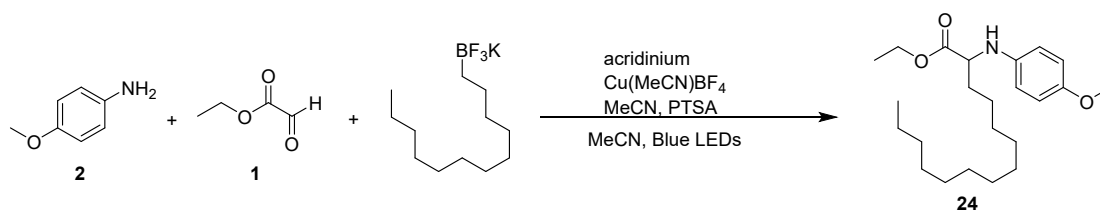

Compound **24** was synthesized following the **General Procedure for the three-components coupling**. The reaction of **2** (24.6 mg, 0.200 mmol, 1.0 equiv.), **1** [50.0 mg (50 wt.% in toluene), 0.240 mmol, 1.2 equiv.], dodecyltrifluoroborate (77.3 mg, 0.280 mmol, 1.4 equiv.), 9-mesityl-10-methylacridinium perchlorate (4.1 mg, 0.0100 mmol, 5 %), *p*-tolylsulfonicacid (1.7 mg, 0.0100 mmol, 5 %) and Cu(MeCN)BF<sub>4</sub> (3.1 mg, 0.0100 mmol, 5 %) in MeCN (2.0 mL) delivered **24** (47.7 mg, 63%) as a white gum after purification via silica gel column chromatography with 5% ethyl acetate/hexanes ( $R_f = 0.4$ , 5% ethyl acetate/hexanes). **1H NMR** (600 MHz, CDCl<sub>3</sub>)  $\delta$  6.76 (d,  $J = 9.0$  Hz, 2 H), 6.60 (d,  $J = 9.0$  Hz, 2 H), 4.22-4.12 (m, 2 H), 3.95 (t,  $J = 6.6$  Hz, 1 H), 3.91-3.77 (br, 1 H), 3.73 (s, 3 H), 1.86-1.68 (m, 2 H), 1.45-1.37 (m, 2 H), 1.33-1.21 (m, 21 H), 0.88 (t,  $J = 6.6$  Hz, 3 H); **13C NMR** (150 MHz, CDCl<sub>3</sub>)  $\delta$  174.6, 152.7, 141.1, 115.1, 114.8, 60.8, 57.9, 55.7, 33.2, 31.9, 30.0, 29.6, 29.5, 29.4, 29.3, 25.6, 22.7, 14.2, 14.1; **HRMS (ESI<sup>+</sup>)** Calcd for C<sub>23</sub>H<sub>40</sub>NO<sub>3</sub> [M+H]<sup>+</sup> 378.3003, found 378.3009.

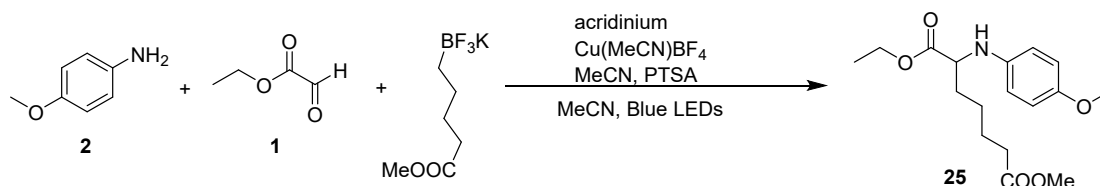

Compound **25** was synthesized following the **General Procedure for the three-**

**components coupling.** The reaction of **2** (24.6 mg, 0.200 mmol, 1.0 equiv.), **1** [50.0 mg (50 wt.% in toluene), 0.240 mmol, 1.2 equiv.], methyl 5-(trifluoroborate)pentanoate (62.2 mg, 0.280 mmol, 1.4 equiv.), 9-mesityl-10-methylacridinium perchlorate (4.1 mg, 0.0100 mmol, 5 %), *p*-tolylsulfonicacid (1.7 mg, 0.0100 mmol, 5 %) and Cu(MeCN)BF<sub>4</sub> (3.1 mg, 0.0100 mmol, 5 %) in MeCN (2.0 mL) delivered **25** (40.2 mg, 67%) as a white gum after purification via silica gel column chromatography with 7% ethyl acetate/hexanes ( *R<sub>f</sub>* = 0.3, 5% ethyl acetate/hexanes). **1H NMR** (600 MHz, CDCl<sub>3</sub>) δ 6.76 (d, *J* = 9.0 Hz, 2 H), 6.59 (d, *J* = 9.0 Hz, 2 H), 4.15 (q, *J* = 7.2 Hz, 2 H), 3.95 (t, *J* = 6.0 Hz, 1 H), 3.91-3.76 (br, 1 H), 3.73 (s, 3 H), 3.66 (s, 3 H), 2.32 (t, *J* = 7.2 Hz, 2 H), 1.87-1.78 (m, 1 H), 1.77-1.70 (m, 1 H), 1.70-1.63 (m, 2 H), 1.53-1.41 (m, 2 H), 1.22 (t, *J* = 7.2 Hz, 3 H); **13C NMR** (150 MHz, CDCl<sub>3</sub>) δ 174.3, 173.8, 152.7, 141.0, 115.1, 114.8, 60.9, 57.7, 55.7, 51.5, 33.8, 32.8, 25.2, 24.6, 14.2; **HRMS (ESI<sup>+</sup>)** Calcd for C<sub>17</sub>H<sub>26</sub>NO<sub>5</sub> [M+H]<sup>+</sup> 324.1805, found 324.1809.

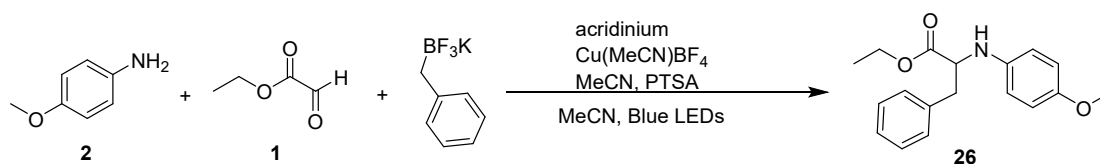

Compound **26** was synthesized following the **General Procedure for the three-components coupling**. The reaction of **2** (24.6 mg, 0.200 mmol, 1.0 equiv.), **1** [50.0 mg (50 wt.% in toluene), 0.240 mmol, 1.2 equiv.], benzyltrifluoroborate (55.4 mg, 0.280 mmol, 1.4 equiv.), 9-mesityl-10-methylacridinium perchlorate (4.1 mg, 0.0100 mmol, 5 %), *p*-tolylsulfonicacid (1.7 mg, 0.0100 mmol, 5 %) and Cu(MeCN)BF<sub>4</sub> (3.1 mg, 0.0100 mmol, 5 %) in MeCN (2.0 mL) delivered **26** (46.2 mg, 77%) as a white gum after purification via silica gel column chromatography with 5% ethyl acetate/hexanes ( *R<sub>f</sub>* = 0.4, 5% ethyl acetate/hexanes). **1H NMR** (600 MHz, CDCl<sub>3</sub>) δ 7.30 (t, *J* = 7.2 Hz, 2 H), 7.24 (t, *J* = 7.2 Hz, 1 H), 7.19 (d, *J* = 6.6 Hz, 2 H), 6.76 (d, *J* = 9.0 Hz, 2 H), 6.58 (d, *J* = 9.0 Hz, 2 H), 4.26 (t, *J* = 6.6 Hz, 1 H), 4.17-4.06 (m, 2 H), 4.03-3.81 (br, 1 H), 3.74 (s, 3 H), 3.11 (t, *J* = 6.6 Hz, 2 H), 1.15 (t, *J* = 7.2 Hz, 3 H); **13C NMR** (150 MHz, CDCl<sub>3</sub>) δ 173.4, 152.8, 140.5, 136.5, 129.3, 128.4, 126.9, 115.2, 114.8, 61.0, 59.0, 55.7, 38.9, 14.1; **HRMS (ESI<sup>+</sup>)** Calcd for C<sub>18</sub>H<sub>22</sub>NO<sub>3</sub> [M+H]<sup>+</sup>

300.1594, found 300.1594.

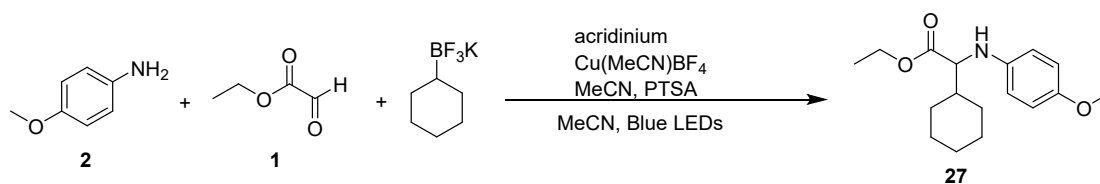

Compound **27** was synthesized following the **General Procedure for the three-components coupling**. The reaction of **2** (24.6 mg, 0.200 mmol, 1.0 equiv.), **1** [50.0 mg (50 wt.% in toluene), 0.240 mmol, 1.2 equiv.], cyclohexyltrifluoroborate (53.2 mg, 0.280 mmol, 1.4 equiv.), 9-mesityl-10-methylacridinium perchlorate (4.1 mg, 0.0100 mmol, 5 %), *p*-tolylsulfonicacid (1.7 mg, 0.0100 mmol, 5 %) and Cu(MeCN)BF<sub>4</sub> (3.1 mg, 0.0100 mmol, 5 %) in MeCN (2.0 mL) delivered **27** (50.8 mg, 87%) as a white gum after purification via silica gel column chromatography with 5% ethyl acetate/hexanes (*R<sub>f</sub>* = 0.4, 5% ethyl acetate/hexanes). **<sup>1</sup>H NMR** (600 MHz, CDCl<sub>3</sub>) δ 6.75 (d, *J* = 9.0 Hz, 2 H), 6.60 (d, *J* = 8.4 Hz, 2 H), 4.18-4.12 (m, 2 H), 4.03-3.81 (br, 1 H), 3.76 (d, *J* = 6.0 Hz, 1 H), 3.73 (s, 3 H), 1.90-1.83 (m, 1 H), 1.81-1.75 (m, 2 H), 1.75-1.70 (m, 1 H), 1.70-1.64 (m, 2 H), 1.27-1.14 (m, 8 H); **<sup>13</sup>C NMR** (150 MHz, CDCl<sub>3</sub>) δ 174.0, 152.6, 141.6, 115.2, 114.8, 63.4, 60.7, 55.7, 41.3, 29.7, 29.2, 26.2, 26.1, 26.1, 14.3; **HRMS (ESI<sup>+</sup>)** Calcd for C<sub>17</sub>H<sub>26</sub>NO<sub>3</sub> [M+H]<sup>+</sup> 292.1907, found 292.1904.

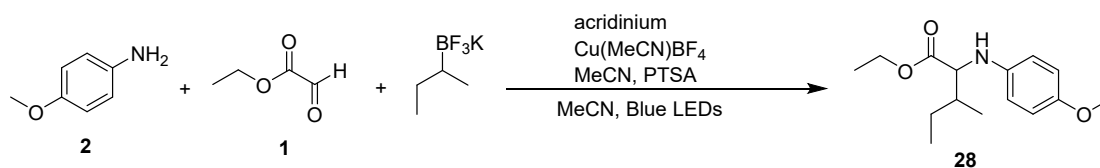

Compound **28** was synthesized following the **General Procedure for the three-components coupling**. The reaction of **2** (24.6 mg, 0.200 mmol, 1.0 equiv.), **1** [50.0 mg (50 wt.% in toluene), 0.240 mmol, 1.2 equiv.], *sec*-butyltrifluoroborate (45.9 mg, 0.280 mmol, 1.4 equiv.), 9-mesityl-10-methylacridinium perchlorate (4.1 mg, 0.0100 mmol, 5 %), *p*-tolylsulfonicacid (1.7 mg, 0.0100 mmol, 5 %) and Cu(MeCN)BF<sub>4</sub> (3.1 mg, 0.0100 mmol, 5 %) in MeCN (2.0 mL) delivered **28** (45.2 mg, 85%) as a white gum after purification via silica gel column chromatography with 5% ethyl acetate/hexanes (*R<sub>f</sub>* = 0.4, 5% ethyl acetate/hexanes). **<sup>1</sup>H NMR** (600 MHz, CDCl<sub>3</sub>) δ

6.76 (d,  $J = 9.0$  Hz, 2 H), 6.61 (dd,  $J = 1.8, 9.0$  Hz, 2 H), 4.21-4.10 (m, 2 H), 3.96-3.80 (c, 2 H), 3.73 (s, 3 H), 1.93-1.78 (m, 1 H), 1.69-1.51 (m, 1 H), 1.35-1.26 (m, 1 H), 1.23 (t,  $J = 7.2$  Hz, 3 H), 1.03-0.92 (m, 6 H);  **$^{13}\text{C}$  NMR** (150 MHz,  $\text{CDCl}_3$ )  $\delta$  174.2, 173.8, 152.6, 152.5, 141.7, 141.4, 115.3, 115.2, 114.8, 62.4, 62.1, 60.7, 60.6, 55.7, 38.0, 37.9, 26.2, 25.6, 15.5, 14.9, 14.3, 11.7, 11.5; **HRMS (ESI<sup>+</sup>)** Calcd for  $\text{C}_{15}\text{H}_{24}\text{NO}_3$   $[\text{M}+\text{H}]^+$  266.1751, found 266.1755.

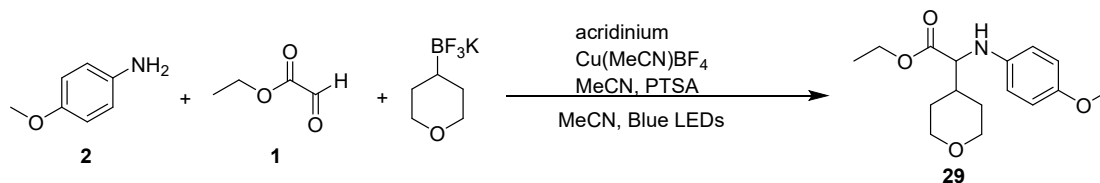

Compound **29** was synthesized following the **General Procedure for the three-components coupling**. The reaction of **2** (24.6 mg, 0.200 mmol, 1.0 equiv.), **1** [50.0 mg (50 wt.% in toluene), 0.240 mmol, 1.2 equiv.], tetrahydro-2*H*-pyran-4-trifluoroborate (53.8 mg, 0.280 mmol, 1.4 equiv.), 9-mesityl-10-methylacridinium perchlorate (4.1 mg, 0.0100 mmol, 5 %), *p*-tolylsulfonicacid (1.7 mg, 0.0100 mmol, 5 %) and  $\text{Cu}(\text{MeCN})\text{BF}_4$  (3.1 mg, 0.0100 mmol, 5 %) in MeCN (2.0 mL) delivered **29** (53.5 mg, 91%) as a white gum after purification via silica gel column chromatography with 8% ethyl acetate/hexanes ( $R_f = 0.35$ , 5% ethyl acetate/hexanes).  **$^1\text{H}$  NMR** (600 MHz,  $\text{CDCl}_3$ )  $\delta$  6.76 (d,  $J = 8.4$  Hz, 2 H), 6.61 (d,  $J = 9.0$  Hz, 2 H), 4.16 (q,  $J = 7.2$  Hz, 2 H), 4.06-3.96 (m, 2 H), 3.94-3.81 (br, 1 H), 7.58 (d,  $J = 6.6$  Hz, 1 H), 3.74 (s, 3 H), 3.44-3.34 (m, 2 H), 2.01-1.90 (m, 1 H), 1.78 (d,  $J = 13.2$  Hz, 1 H), 1.65-1.48 (m, 3 H), 1.24 (t,  $J = 7.2$  Hz, 3 H);  **$^{13}\text{C}$  NMR** (150 MHz,  $\text{CDCl}_3$ )  $\delta$  173.4, 152.8, 141.2, 115.4, 114.8, 67.8, 67.6, 62.8, 61.0, 55.7, 33.8, 29.4, 29.4, 14.3; **HRMS (ESI<sup>+</sup>)** Calcd for  $\text{C}_{16}\text{H}_{24}\text{NO}_4$   $[\text{M}+\text{H}]^+$  294.1700, found 294.1689.

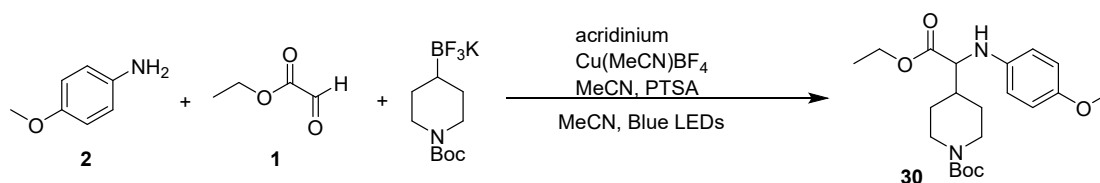

Compound **30** was synthesized following the **General Procedure for the three-components coupling**. The reaction of **2** (24.6 mg, 0.200 mmol, 1.0 equiv.), **1** [50.0 mg (50 wt.% in toluene), 0.240 mmol, 1.2 equiv.], trifluoroborate (81.5 mg, 0.280

mmol, 1.4 equiv.), 9-mesityl-10-methylacridinium perchlorate (4.1 mg, 0.0100 mmol, 5 %), *p*-tolylsulfonicacid (1.7 mg, 0.0100 mmol, 5 %) and Cu(MeCN)BF<sub>4</sub> (3.1 mg, 0.0100 mmol, 5 %) in MeCN (2.0 mL) delivered **30** (62.9 mg, 80%) as a white gum after purification via silica gel column chromatography with 10% ethyl acetate/hexanes (R<sub>f</sub> = 0.2, 5% ethyl acetate/hexanes). **<sup>1</sup>H NMR** (600 MHz, CDCl<sub>3</sub>) δ 6.76 (d, *J* = 9.0 Hz, 2 H), 6.60 (d, *J* = 9.0 Hz, 2 H), 4.31-4.00 (c, 4 H), 3.92-3.81 (br, 1 H), 3.78 (d, *J* = 6.0 Hz, 1 H), 3.73 (s, 3 H), 2.79-2.59 (br, 2 H), 1.91-1.78 (m, 2 H), 1.61 (d, *J* = 13.2 Hz, 1 H), 1.45 (s, 9 H), 1.43-1.29 (m, 2 H), 1.23 (t, *J* = 7.2 Hz, 3 H); **<sup>13</sup>C NMR** (150 MHz, CDCl<sub>3</sub>) δ 173.4, 154.7, 152.9, 141.2, 115.4, 114.8, 79.5, 62.6, 61.0, 55.7, 39.8, 28.4, 14.3; **HRMS (ESI<sup>+</sup>)** Calcd for C<sub>21</sub>H<sub>33</sub>N<sub>2</sub>O<sub>5</sub> [M+H]<sup>+</sup> 393.2384, found 393.2388.

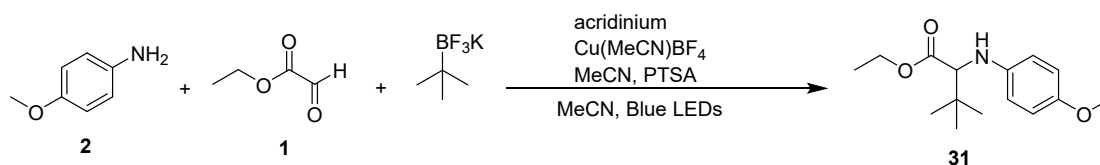

Compound **31** was synthesized following the **General Procedure for the three-components coupling**. The reaction of **2** (24.6 mg, 0.200 mmol, 1.0 equiv.), **1** [50.0 mg (50 wt.% in toluene), 0.240 mmol, 1.2 equiv.], *tert*-butyltrifluoroborate (45.9 mg, 0.280 mmol, 1.4 equiv.), 9-mesityl-10-methylacridinium perchlorate (4.1 mg, 0.0100 mmol, 5 %), *p*-tolylsulfonicacid (1.7 mg, 0.0100 mmol, 5 %) and Cu(MeCN)BF<sub>4</sub> (3.1 mg, 0.0100 mmol, 5 %) in MeCN (2.0 mL) delivered **31** (44.1 mg, 83%) as a white gum after purification via silica gel column chromatography with 5% ethyl acetate/hexanes (R<sub>f</sub> = 0.4, 5% ethyl acetate/hexanes). **<sup>1</sup>H NMR** (600 MHz, CDCl<sub>3</sub>) δ 6.76 (d, *J* = 9.0 Hz, 2 H), 6.64 (d, *J* = 8.4 Hz, 2 H), 4.19-4.07 (m, 2 H), 4.01-3.80 (br, 1 H), 3.73 (s, 3 H), 3.67 (s, 1 H), 1.22 (t, *J* = 7.2 Hz, 3 H), 1.06 (s, 9 H); **<sup>13</sup>C NMR** (150 MHz, CDCl<sub>3</sub>) δ 173.6, 152.7, 141.8, 115.6, 114.8, 67.0, 60.4, 55.7, 34.3, 26.8, 14.3; **HRMS (ESI<sup>+</sup>)** Calcd for C<sub>15</sub>H<sub>24</sub>NO<sub>3</sub> [M+H]<sup>+</sup> 266.1751, found 266.1754.

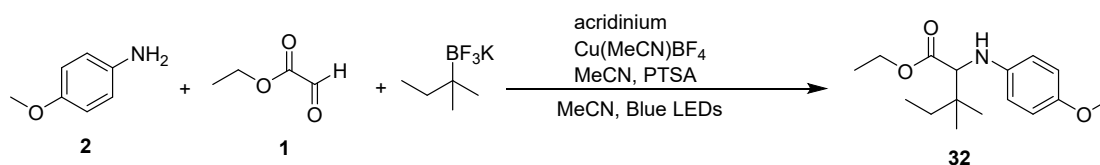

Compound **32** was synthesized following the **General Procedure for the three-**



**components coupling.** The reaction of **2** (24.6 mg, 0.200 mmol, 1.0 equiv.), **1** [50.0 mg (50 wt.% in toluene), 0.240 mmol, 1.2 equiv.], *tert*-pentyltrifluoroborate (49.8 mg, 0.280 mmol, 1.4 equiv.), 9-mesityl-10-methylacridinium perchlorate (4.1 mg, 0.0100 mmol, 5 %), *p*-tolylsulfonicacid (1.7 mg, 0.0100 mmol, 5 %) and Cu(MeCN)BF<sub>4</sub> (3.1 mg, 0.0100 mmol, 5 %) in MeCN (2.0 mL) delivered **32** (45.4 mg, 81%) as a white gum after purification via silica gel column chromatography with 5% ethyl acetate/hexanes (R<sub>f</sub> = 0.4, 5% ethyl acetate/hexanes). **<sup>1</sup>H NMR** (600 MHz, CDCl<sub>3</sub>) δ 6.75 (d, *J* = 9.0 Hz, 2 H), 6.63 (d, *J* = 9.0 Hz, 2 H), 4.20-4.07 (m, 2 H), 4.06-3.79 (br, 1 H), 3.75 (s, 1 H), 3.73 (s, 3 H), 1.52-1.38 (m, 2 H), 1.21 (t, *J* = 7.2 Hz, 3 H), 1.01 (s, 3 H), 0.98 (s, 3 H), 0.90 (t, *J* = 7.8 Hz, 3 H); **<sup>13</sup>C NMR** (150 MHz, CDCl<sub>3</sub>) δ 173.8, 152.7, 141.8, 115.6, 114.8, 65.3, 60.4, 55.7, 32.1, 23.4, 23.1, 14.3, 8.2; **HRMS (ESI<sup>+</sup>)** Calcd for C<sub>16</sub>H<sub>26</sub>NO<sub>3</sub> [M+H]<sup>+</sup> 280.1907, found 280.1901.

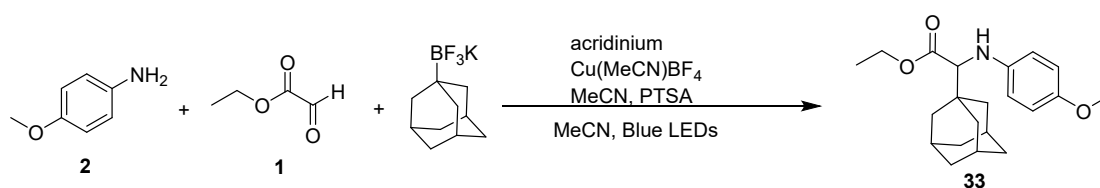

Compound **33** was synthesized following the **General Procedure for the three-components coupling**. The reaction of **2** (24.6 mg, 0.200 mmol, 1.0 equiv.), **1** [50.0 mg (50 wt.% in toluene), 0.240 mmol, 1.2 equiv.], 1-adamantyl trifluoroborate (49.8 mg, 0.280 mmol, 1.4 equiv.), 9-mesityl-10-methylacridinium perchlorate (4.1 mg, 0.0100 mmol, 5 %), *p*-tolylsulfonicacid (1.7 mg, 0.0100 mmol, 5 %) and Cu(MeCN)BF<sub>4</sub> (3.1 mg, 0.0100 mmol, 5 %) in MeCN (2.0 mL) delivered **33** (61.2 mg, 89%) as a white gum after purification via silica gel column chromatography with 5% ethyl acetate/hexanes (R<sub>f</sub> = 0.4, 5% ethyl acetate/hexanes). **<sup>1</sup>H NMR** (600 MHz, CDCl<sub>3</sub>) δ 6.75 (d, *J* = 9.0 Hz, 2 H), 6.63 (d, *J* = 8.4 Hz, 2 H), 4.13 (q, *J* = 7.8 Hz, 2 H), 4.06-3.80 (br, 1 H), 3.73 (s, 3 H), 3.54 (s, 1 H), 2.02 (s, 3 H), 1.82 (d, *J* = 12.0 Hz, 3 H), 1.73 (d, *J* = 12.6 Hz, 3 H), 1.66 (d, *J* = 12.0 Hz, 3 H), 1.58 (d, *J* = 12.0 Hz, 3 H), 1.23 (t, *J* = 7.2 Hz, 3 H); **<sup>13</sup>C NMR** (150 MHz, CDCl<sub>3</sub>) δ 173.1, 152.6, 142.0, 115.5, 114.8, 68.0, 60.4, 55.7, 39.0, 36.9, 36.1, 28.4, 14.3; **HRMS (ESI<sup>+</sup>)** Calcd for C<sub>21</sub>H<sub>30</sub>NO<sub>3</sub> [M+H]<sup>+</sup> 344.2220, found 344.2220.

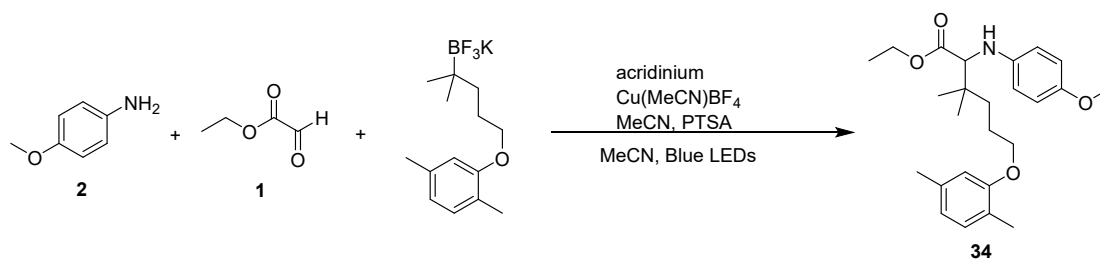

Compound **34** was synthesized following the **General Procedure for the three-components coupling**. The reaction of **2** (24.6 mg, 0.200 mmol, 1.0 equiv.), **1** [50.0 mg (50 wt.% in toluene), 0.240 mmol, 1.2 equiv.], (5-(2,5-dimethylphenoxy)-2-methylpentan-2-yl)trifluoroborate (87.4 mg, 0.280 mmol, 1.4 equiv.), 9-mesityl-10-methylacridinium perchlorate (4.1 mg, 0.0100 mmol, 5 %), *p*-tolylsulfonicacid (1.7 mg, 0.0100 mmol, 5 %) and Cu(MeCN)BF<sub>4</sub> (3.1 mg, 0.0100 mmol, 5 %) in MeCN (2.0 mL) delivered **34** (71.2 mg, 86%) as a white gum after purification via silica gel column chromatography with 8% ethyl acetate/hexanes ( *R<sub>f</sub>* = 0.35, 5% ethyl acetate/hexanes). **<sup>1</sup>H NMR** (600 MHz, CDCl<sub>3</sub>) δ 7.00 (d, *J* = 7.2 Hz, 1 H), 6.76 (d, *J* = 9.0 Hz, 2 H), 6.69-6.63 (c, 3 H), 6.61 (s, 1 H), 4.19-4.09 (m, 2 H), 4.00-3.83 (c, 3 H), 3.78 (s, 1 H), 3.74 (s, 3 H), 2.30 (s, 3 H), 2.17 (s, 3 H), 1.94-1.77 (m, 2 H), 1.67-1.52 (m, 2 H), 1.22 (t, *J* = 7.2 Hz, 3 H), 1.08 (s, 3 H), 1.07 (s, 3 H); **<sup>13</sup>C NMR** (150 MHz, CDCl<sub>3</sub>) δ 173.6, 157.0, 152.8, 141.7, 136.4, 130.3, 123.5, 120.6, 115.7, 114.8, 112.0, 68.3, 65.6, 60.5, 55.7, 36.6, 36.1, 24.1, 24.0, 23.5, 21.4, 15.8, 14.3; **HRMS (ESI<sup>+</sup>)** Calcd for C<sub>25</sub>H<sub>36</sub>NO<sub>4</sub> [M+H]<sup>+</sup> 414.2639, found 414.2644.

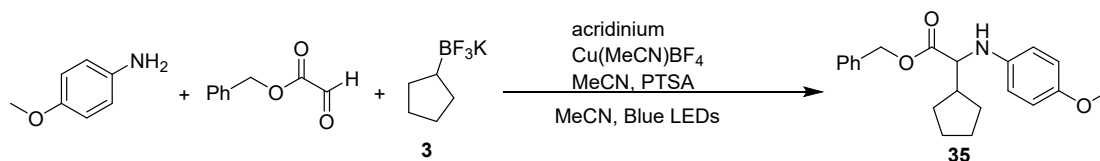

Compound **35** was synthesized following the **General Procedure for the three-components coupling**. The reaction of *p*-anisidine (24.6 mg, 0.200 mmol, 1.0 equiv.), benzyl 2-oxoacetate (39.4 mg, 0.240 mmol, 1.2 equiv.), **3** (49.3 mg, 0.280 mmol, 1.4 equiv.), 9-mesityl-10-methylacridinium perchlorate (4.1 mg, 0.0100 mmol, 5 %), *p*-tolylsulfonicacid (1.7 mg, 0.0100 mmol, 5 %) and Cu(MeCN)BF<sub>4</sub> (3.1 mg, 0.0100 mmol, 5 %) in MeCN (2.0 mL) delivered **35** (59.8 mg, 88%) as a white gum after purification via silica gel column chromatography with 5% ethyl acetate/hexanes ( *R<sub>f</sub>*

= 0.4, 5% ethyl acetate/hexanes). **<sup>1</sup>H NMR** (600 MHz, CDCl<sub>3</sub>) δ 7.33-7.23 (m, 3 H), 7.19 (d, *J* = 7.2 Hz, 2 H), 6.68 (d, *J* = 9.0 Hz, 2 H), 6.54 (d, *J* = 8.4 Hz, 2 H), 5.05 (s, 2 H), 3.88-3.75 (c, 2 H), 3.68 (s, 3 H), 2.23-2.11 (m, 1 H), 1.81-1.72 (m, 1 H), 1.67-1.54 (m, 3 H), 1.54-1.45 (m, 2 H), 1.44-1.35 (m, 2 H); **<sup>13</sup>C NMR** (150 MHz, CDCl<sub>3</sub>) δ 174.3, 152.7, 141.3, 135.6, 128.5, 128.2, 128.2, 115.2, 114.8, 66.5, 62.2, 55.7, 43.1, 29.4, 29.0, 25.3, 25.1; **HRMS (ESI<sup>+</sup>)** Calcd for C<sub>21</sub>H<sub>26</sub>NO<sub>3</sub> [M+H]<sup>+</sup> 340.1907, found 340.1911.

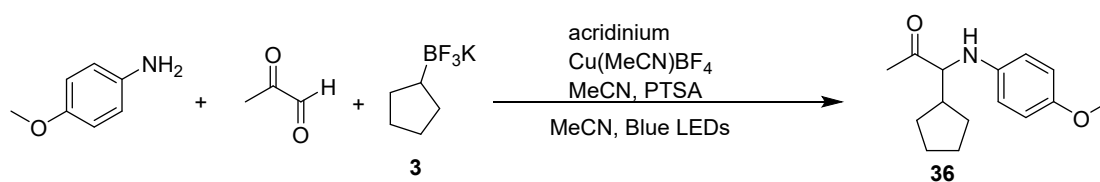

Compound **36** was synthesized following the **General Procedure for the three-components coupling**. The reaction of *p*-anisidine (24.6 mg, 0.200 mmol, 1.0 equiv.), 2-oxopropanal (17.3 mg, 0.240 mmol, 1.2 equiv.), **3** (49.3 mg, 0.280 mmol, 1.4 equiv.), 9-mesityl-10-methylacridinium perchlorate (4.1 mg, 0.0100 mmol, 5 %), *p*-tolylsulfonicacid (1.7 mg, 0.0100 mmol, 5 %) and Cu(MeCN)BF<sub>4</sub> (3.1 mg, 0.0100 mmol, 5 %) in MeCN (2.0 mL) delivered **36** (36.7 mg, 74%) as a white gum after purification via silica gel column chromatography with 10% ethyl acetate/hexanes (*R<sub>f</sub>* = 0.3, 10% ethyl acetate/hexanes). **<sup>1</sup>H NMR** (600 MHz, CDCl<sub>3</sub>) δ 6.75 (d, *J* = 9.0 Hz, 2 H), 6.53 (d, *J* = 9.0 Hz, 2 H), 4.06-3.89 (br, 1 H), 3.73 (s, 3 H), 3.65 (d, *J* = 7.8 Hz, 1 H), 2.22-2.14 (m, 1 H), 2.13 (s, 3 H), 1.82-1.74 (m, 1 H), 1.74-1.62 (m, 3 H), 1.60-1.55 (m, 2 H), 1.48-1.33 (m, 2 H); **<sup>13</sup>C NMR** (150 MHz, CDCl<sub>3</sub>) δ 211.7, 152.4, 141.7, 115.0, 114.4, 69.0, 55.8, 42.1, 29.4, 29.0, 26.2, 25.3, 25.0; **HRMS (ESI<sup>+</sup>)** Calcd for C<sub>15</sub>H<sub>22</sub>NO<sub>3</sub> [M+H]<sup>+</sup> 248.1645, found 248.1646.

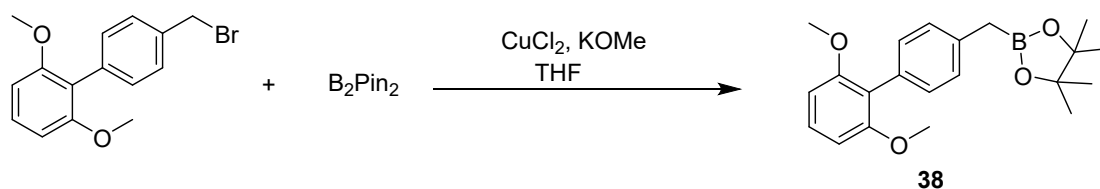

In a 50 mL thick-walled reaction tube equipped with a magnetic stirring bar, CuCl<sub>2</sub> (4.4 mg, 0.0326 mmol, 1 %), IMes (9.9 mg, 0.0326 mmol, 1 %) and THF (25 mL) was added. After stirring for 10 min, bis(pinacolato)diboron (0.993 g, 3.91 mmol, 1.2

equiv.) and KOMe (0.274 g, 3.91 mmol, 1.2 equiv.) was added and the reaction was stirred for an additional 10 min. To the mixture, alkyl bromide (1.00 g, 3.26 mmol, 1.2 equiv.) was added. The resulting reaction mixture was stirred vigorously at room temperature overnight. The reaction mixture was then diluted with Et<sub>2</sub>O (80 mL) and filtered through a plug of celite. The organic layer was washed with brine (50 mL), dried over Na<sub>2</sub>SO<sub>4</sub>, filtered and concentrated. The residue was then purified by column chromatography on silica gel with 5% ethyl acetate/hexanes (*R<sub>f</sub>* = 0.3, 5% ethyl acetate/hexanes) to give target product as a white gum (0.762 g, 66%). **<sup>1</sup>H NMR** (500 MHz, CDCl<sub>3</sub>) δ 7.29-7.25 (c, 5 H), 6.68 (d, *J* = 8.0 Hz, 2 H), 3.76 (s, 6 H), 2.37 (s, 2 H), 1.30 (s, 12 H); **<sup>13</sup>C NMR** (125 MHz, CDCl<sub>3</sub>) δ 157.7, 136.8, 130.7, 128.5, 128.3, 104.2, 104.2, 83.4, 55.9, 25.0, 24.8, 24.6; **HRMS (ESI<sup>+</sup>)** Calcd for C<sub>21</sub>H<sub>28</sub>BO<sub>4</sub> [M+H]<sup>+</sup> 355.2075, found 355.2076.

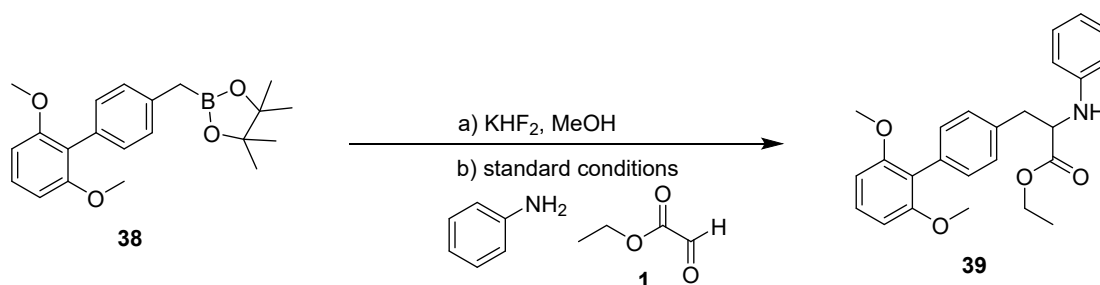

To a solution of **38** (0.500 g, 1.41 mmol, 1 equiv.) in THF (1.5 mL) was added KHF<sub>2</sub> (aq. sat. solution, 5.0 mL), and the mixture was stirred vigorously for 2 h before being concentrated under reduced pressure. The residue was used for the three-component coupling without further purification. Compound **39** was synthesized following the **General Procedure for the three-components coupling**. The reaction of the above residue, aniline (93.0 mg, 1.00 mmol, 0.71 equiv.), **1** [0.244 g (50 wt.% in toluene), 1.17 mmol, 0.83 equiv.], 9-mesityl-10-methylacridinium perchlorate (28.9 mg, 0.0705 mmol, 5%), *p*-tolylsulfonic acid (12.0 mg, 0.0705 mmol, 5%) and Cu(MeCN)BF<sub>4</sub> (21.8 mg, 0.0705 mmol, 5%) in MeCN (15 mL) delivered **39** (0.406 g, 71%) as a white gum after purification via silica gel column chromatography with 15% ethyl acetate/hexanes (*R<sub>f</sub>* = 0.3, 15% ethyl acetate/hexanes). **<sup>1</sup>H NMR** (500 MHz, CDCl<sub>3</sub>) δ 7.26 (t, *J* = 8.5 Hz, 3 H), 7.24-7.20 (m, 2 H), 7.17 (dt, *J* = 7.0, 1.5 Hz, 2 H), 6.78-6.71 (m, 1 H), 6.64 (d, *J* = 8.5 Hz, 4 H), 4.38 (t, *J* = 7.0 Hz, 1 H), 4.30-4.16 (br, 1 H), 4.12 (q, *J* = 7.0 Hz,

2 H), 3.71 (s, 6 H), 3.22-3.08 (m, 2 H), 1.16 (t,  $J = 7.0$  Hz, 3 H); **13C NMR** (125 MHz, CDCl<sub>3</sub>)  $\delta$  173.5, 157.6, 146.5, 134.6, 132.8, 131.0, 129.3, 128.6, 128.5, 128.5, 119.2, 118.3, 113.6, 104.2, 104.1, 61.0, 57.8, 55.8, 38.8, 14.0; **HRMS (ESI<sup>+</sup>)** Calcd for C<sub>25</sub>H<sub>28</sub>NO<sub>4</sub> [M+H]<sup>+</sup> 406.2103, found 406.2105.

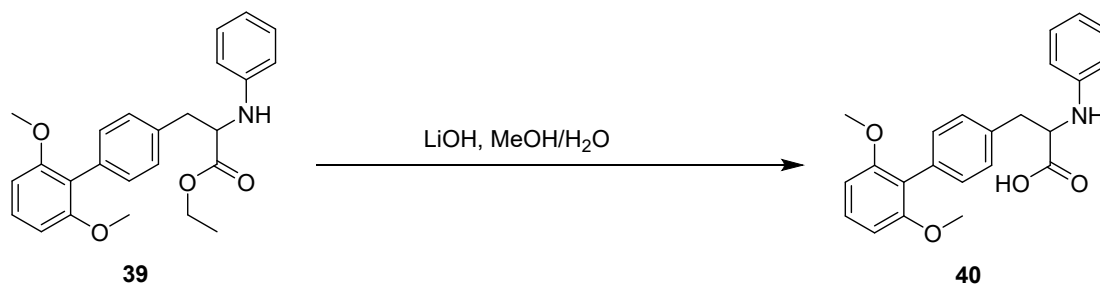

To a solution of 39 (0.300 g, 0.795 mmol, 1 equiv.) in MeOH/H<sub>2</sub>O (6 mL/2 mL) was added LiOH (22.9 g, 0.954 mmol, 1.2 equiv.), and the mixture was stirred at room temperature for 2 h. The reaction was poured into water (50 mL) and extracted with ethyl acetate (3×25 mL). The organic layer was washed with brine (20 mL), dried over Na<sub>2</sub>SO<sub>4</sub>, filtered and concentrated. The residue was then purified by column chromatography on silica gel to give 40 as a white gum after purification via silica gel column chromatography with 40% ethyl acetate/hexanes (  $R_f = 0.3$ , 30% ethyl acetate/hexanes). **1H NMR** (500 MHz, CDCl<sub>3</sub>)  $\delta$  7.32-7.23 (m, 5 H), 7.19 (t,  $J = 8.0$  Hz, 2 H), 6.80 (t,  $J = 7.5$  Hz, 1 H), 6.64 (d,  $J = 8.5$  Hz, 4 H), 4.35 (t,  $J = 6.0$  Hz, 1 H), 3.71 (s, 6 H), 3.31 (dd,  $J = 14.0, 5.0$  Hz, 1 H), 3.15 (dd,  $J = 14.0, 7.5$  Hz, 1 H), 2.98 (d,  $J = 8.5$  Hz, 4 H); **13C NMR** (125 MHz, CDCl<sub>3</sub>)  $\delta$  176.1, 157.6, 146.2, 134.0, 133.1, 131.4, 129.4, 128.7, 128.5, 119.4, 118.9, 114.1, 104.2, 58.1, 55.9, 38.1; **HRMS (ESI<sup>+</sup>)** Calcd for C<sub>23</sub>H<sub>24</sub>NO<sub>4</sub> [M+H]<sup>+</sup> 378.1700, found 378.1705.

# NMR DATA

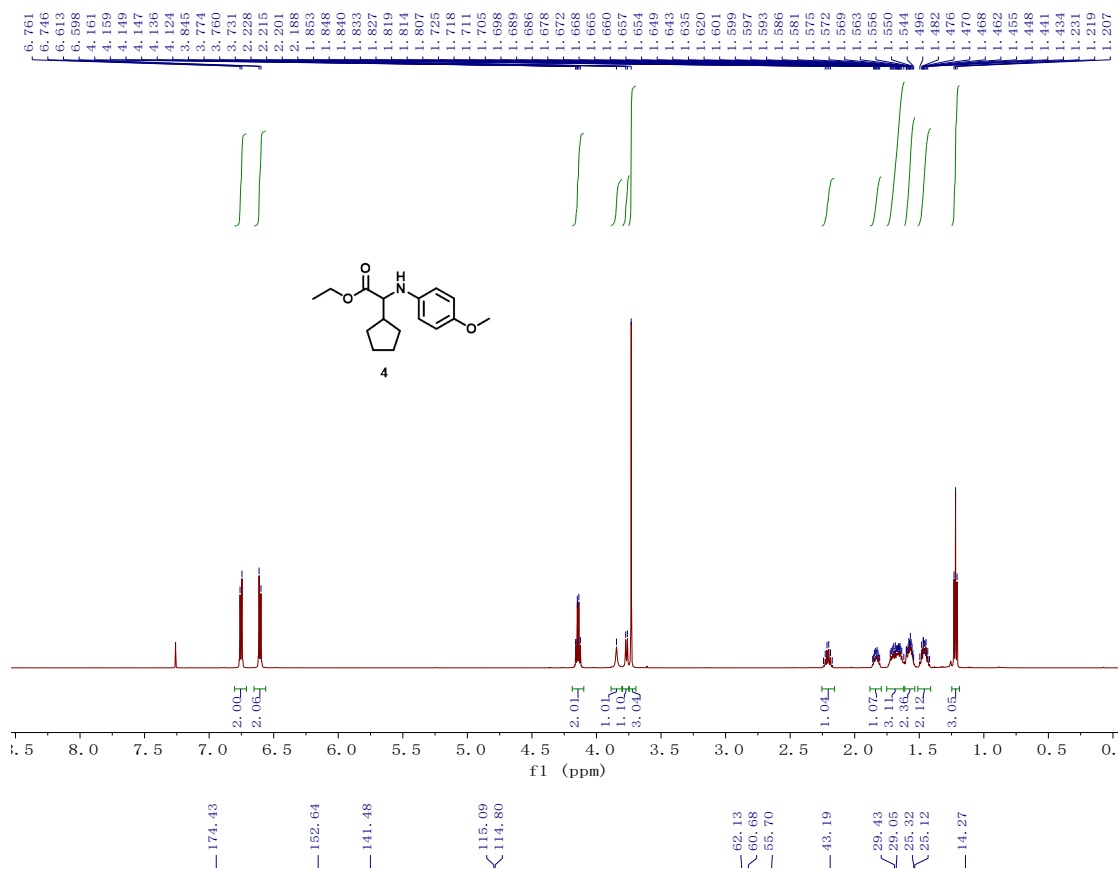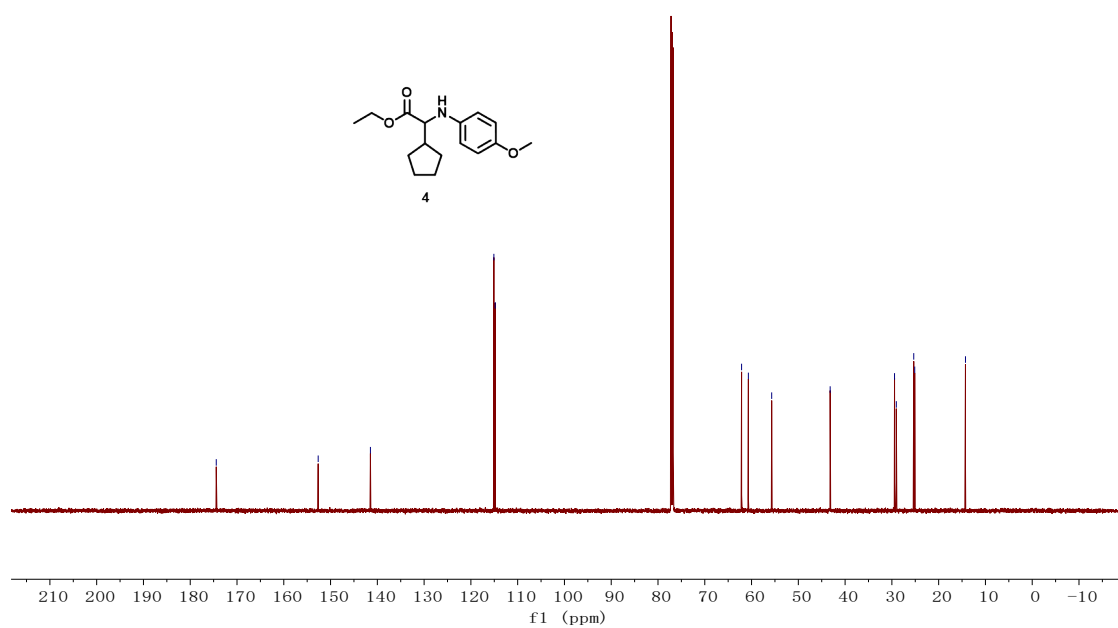

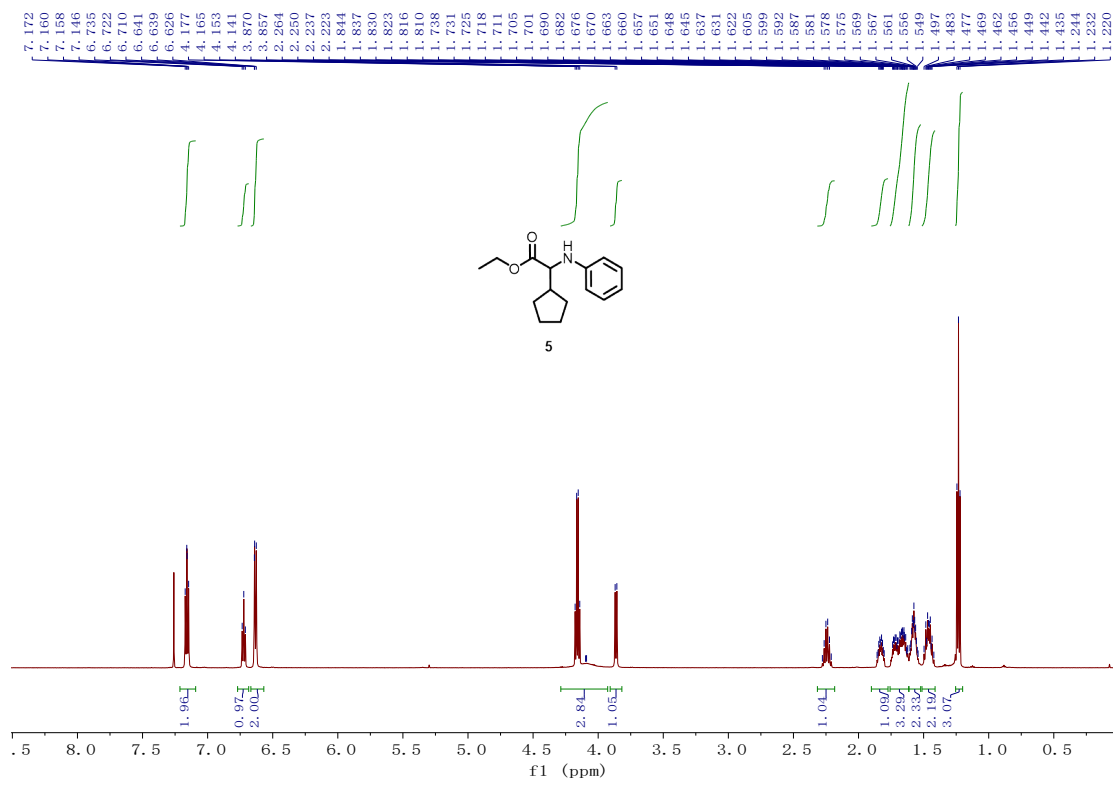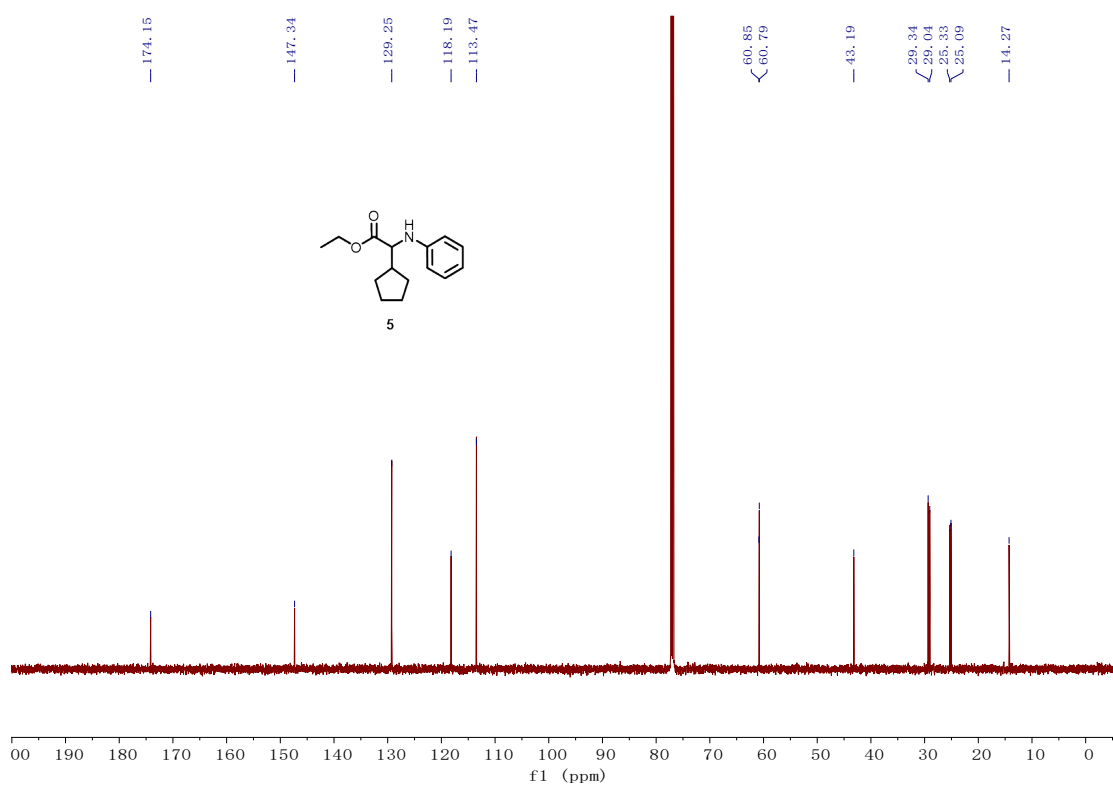

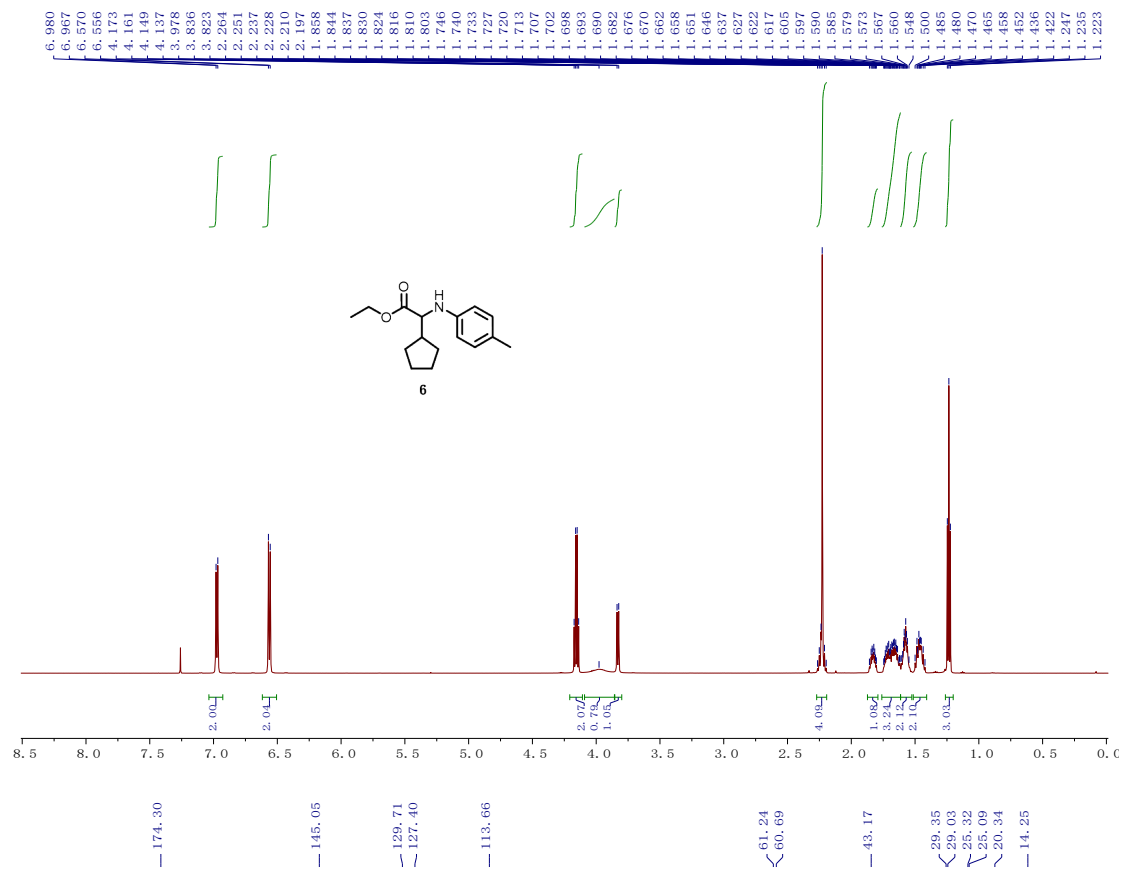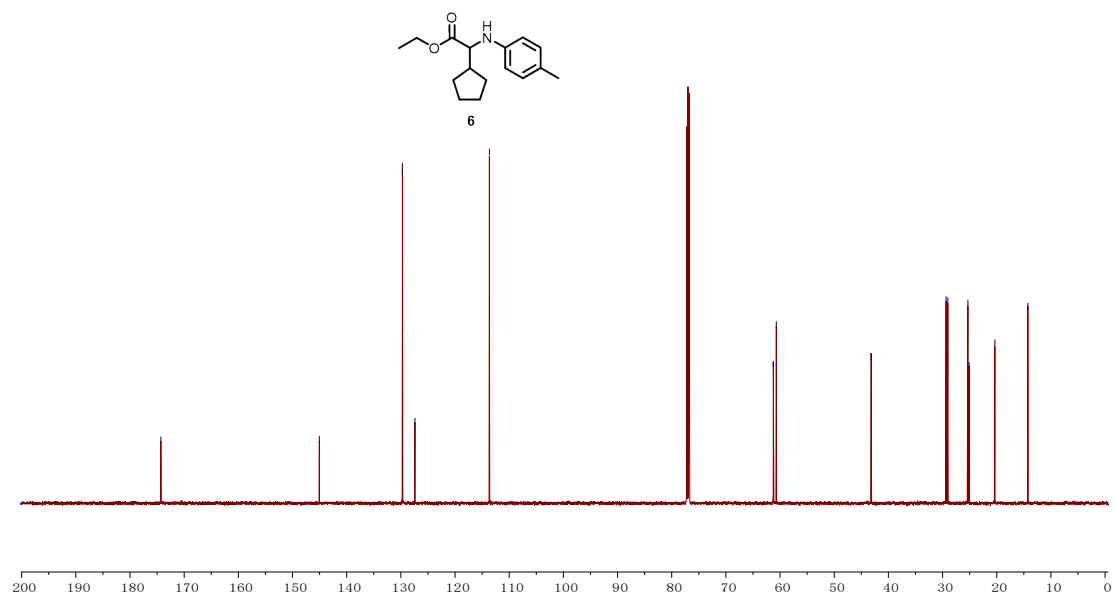



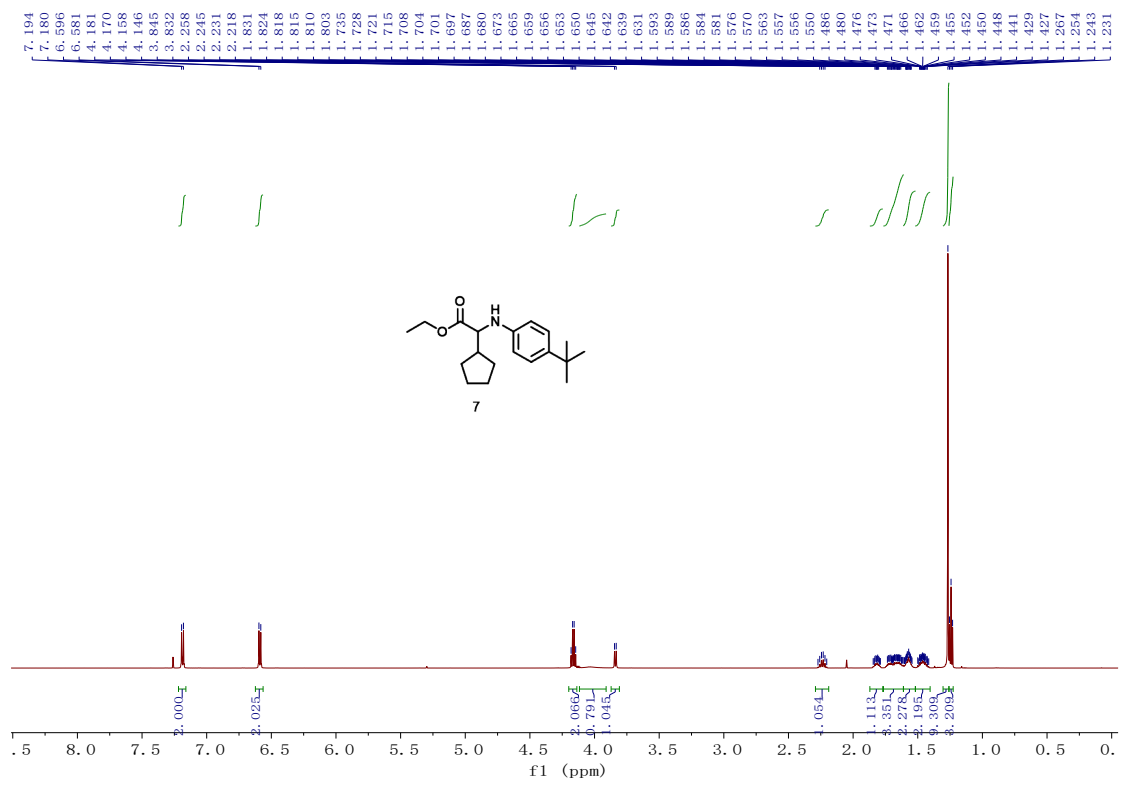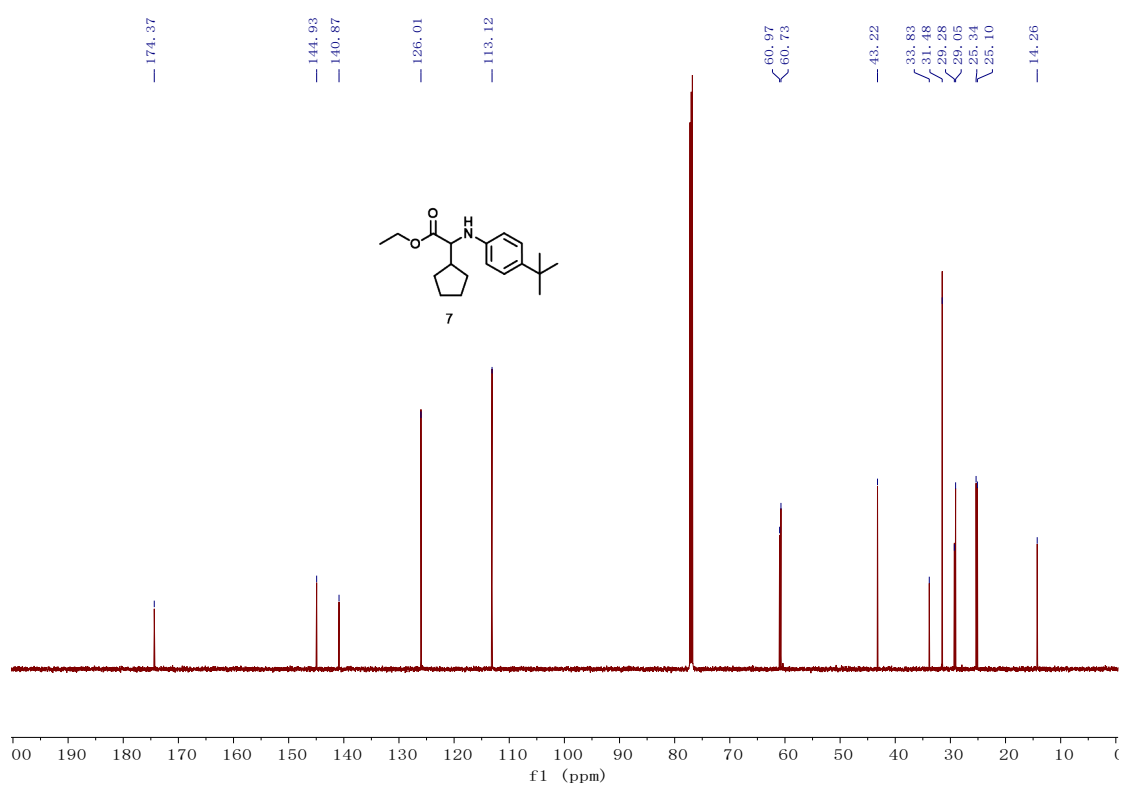

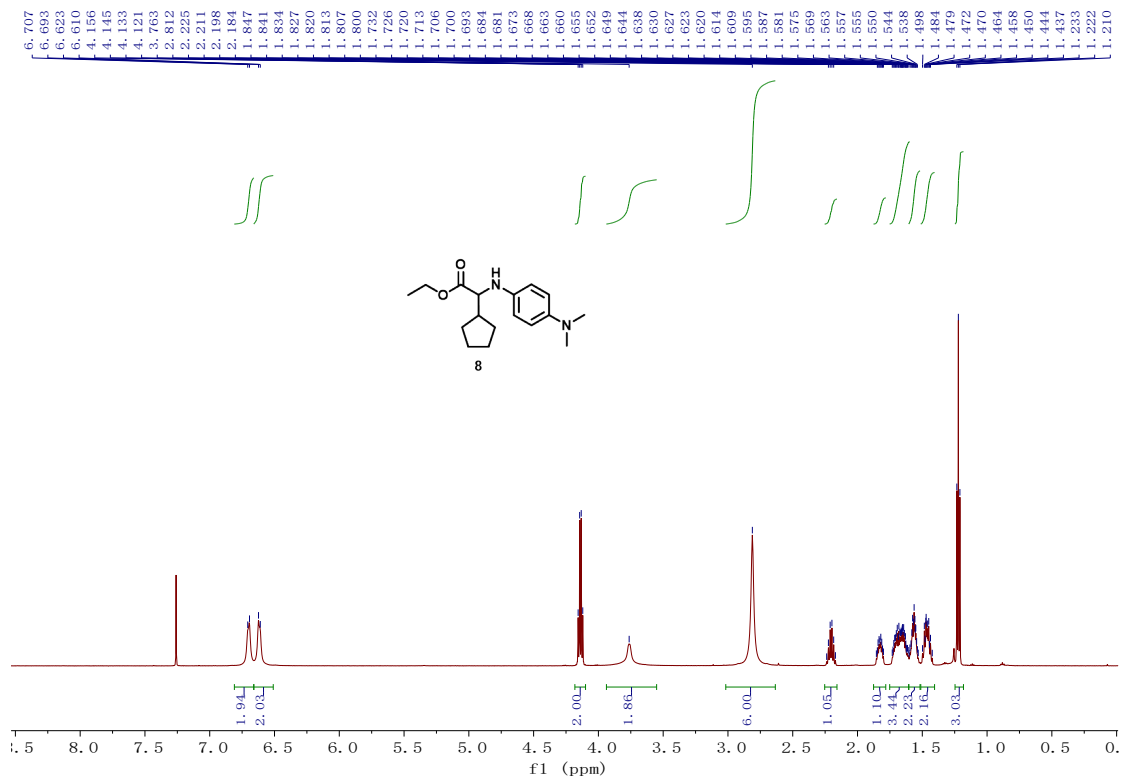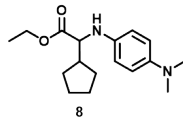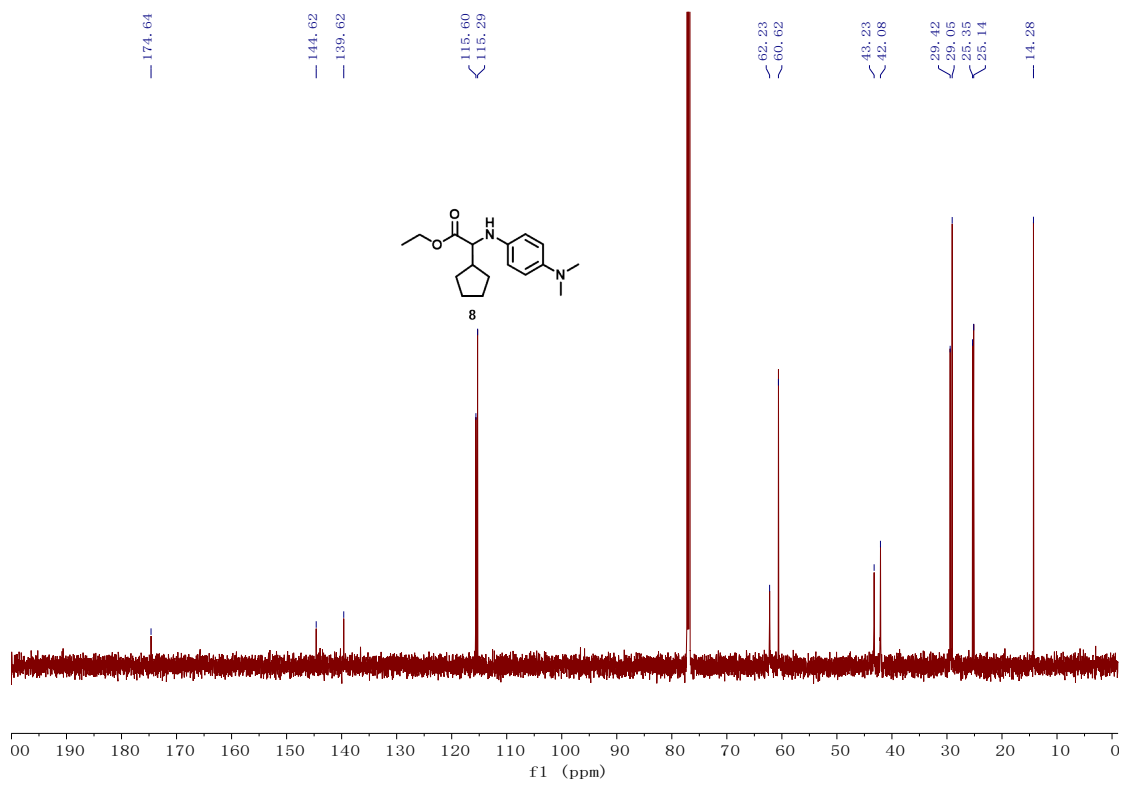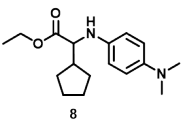

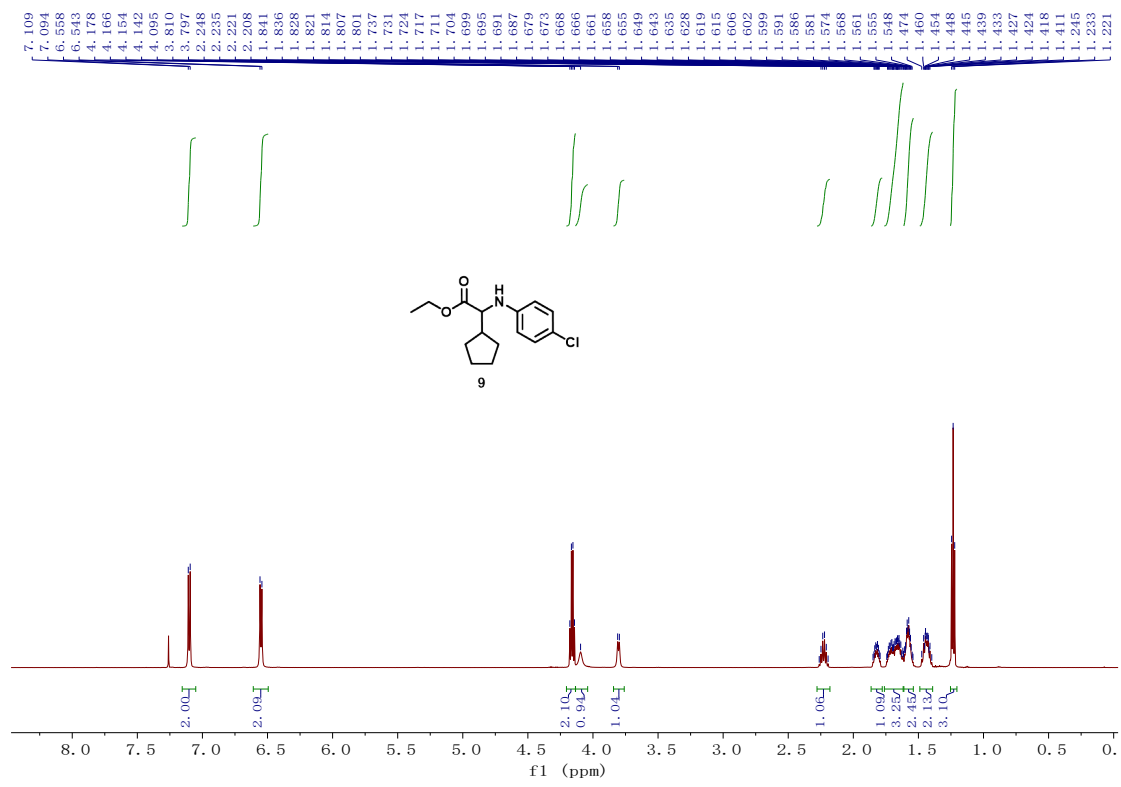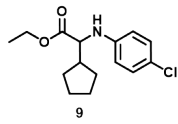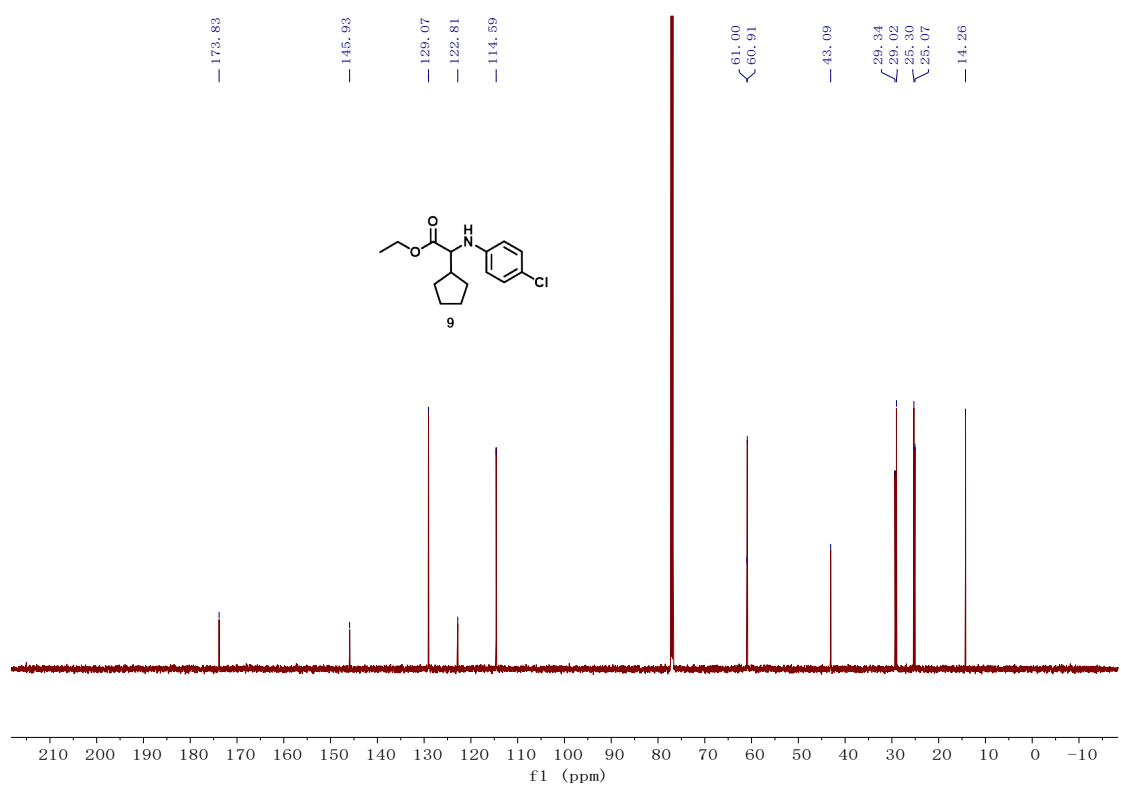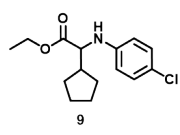

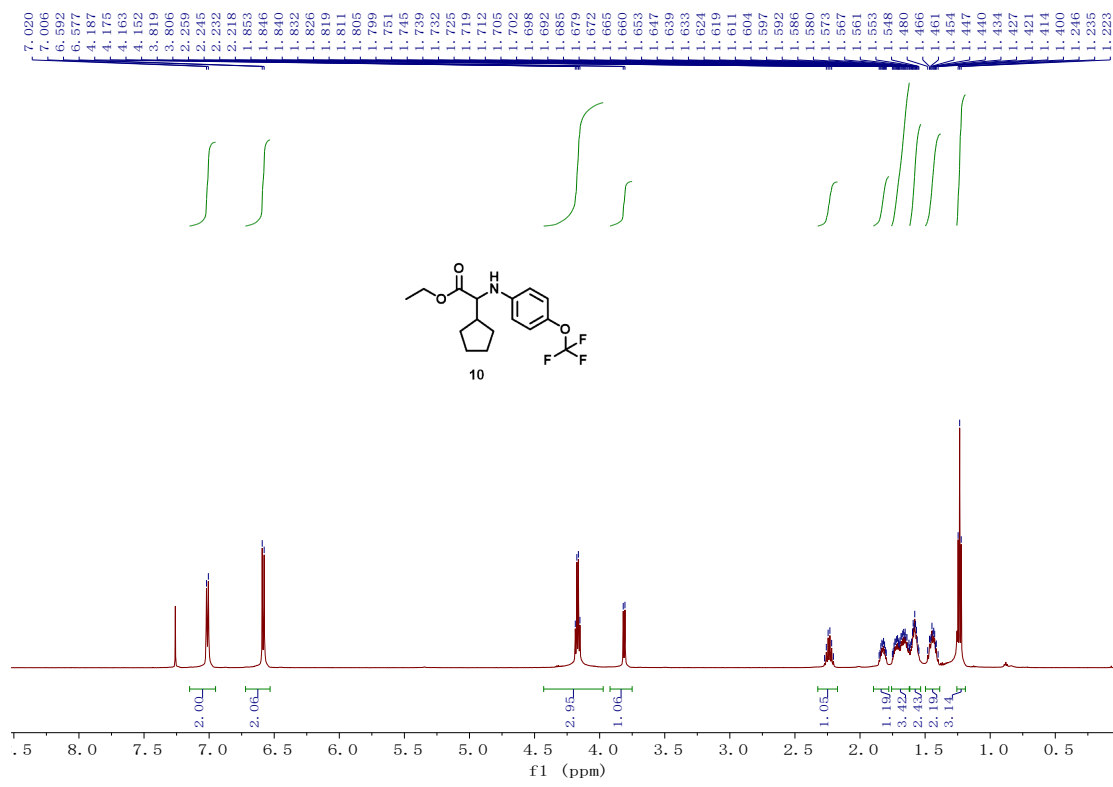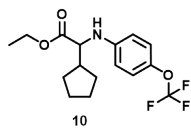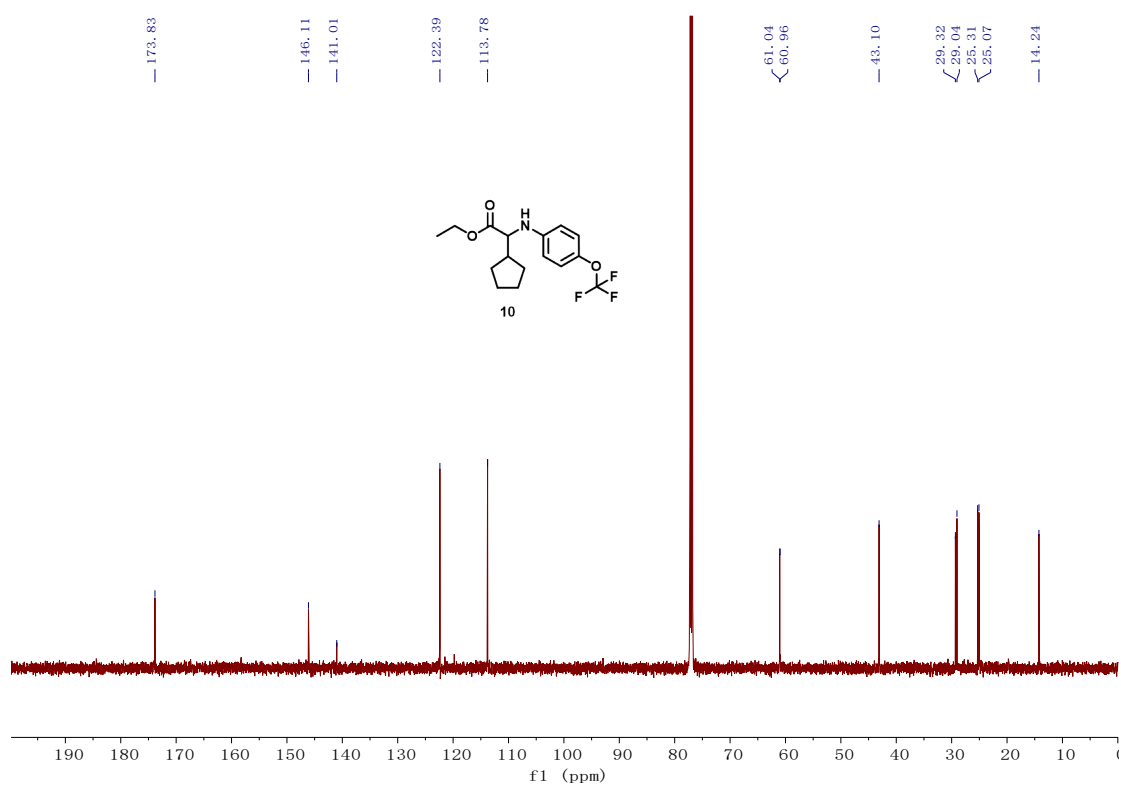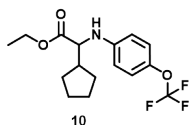

-68.46

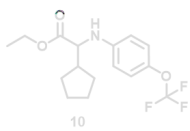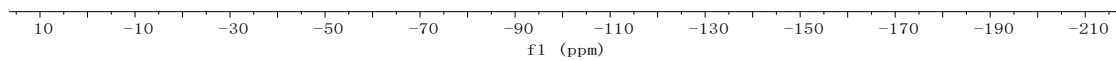

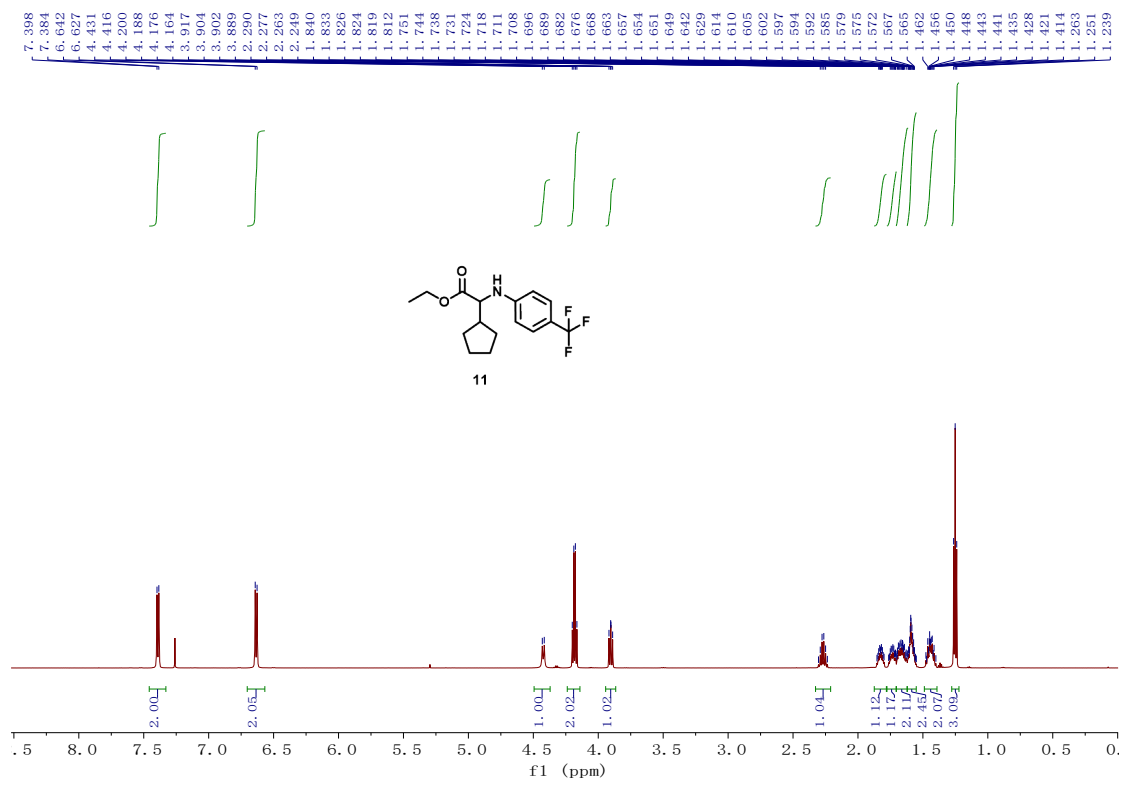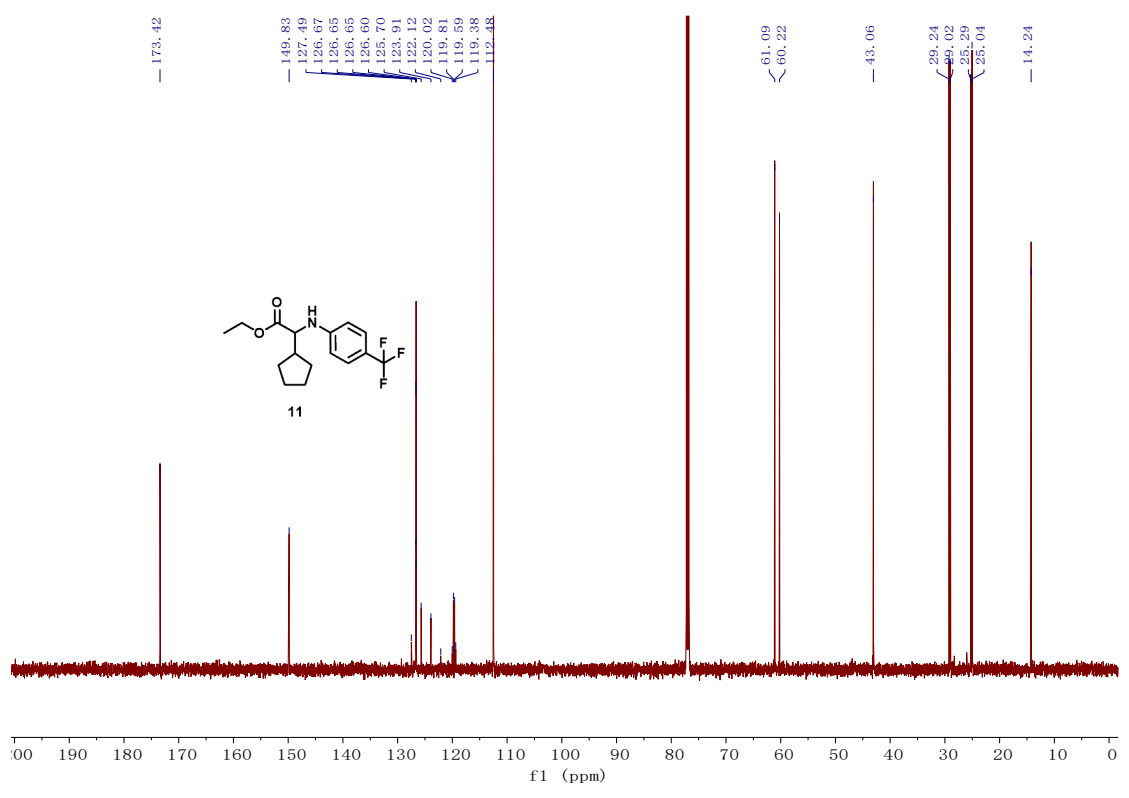

-61.18

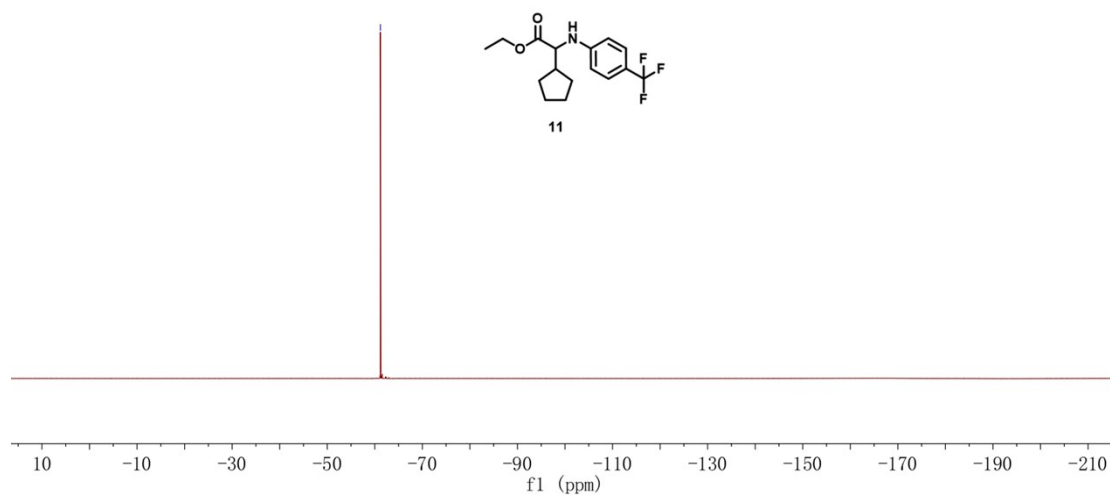

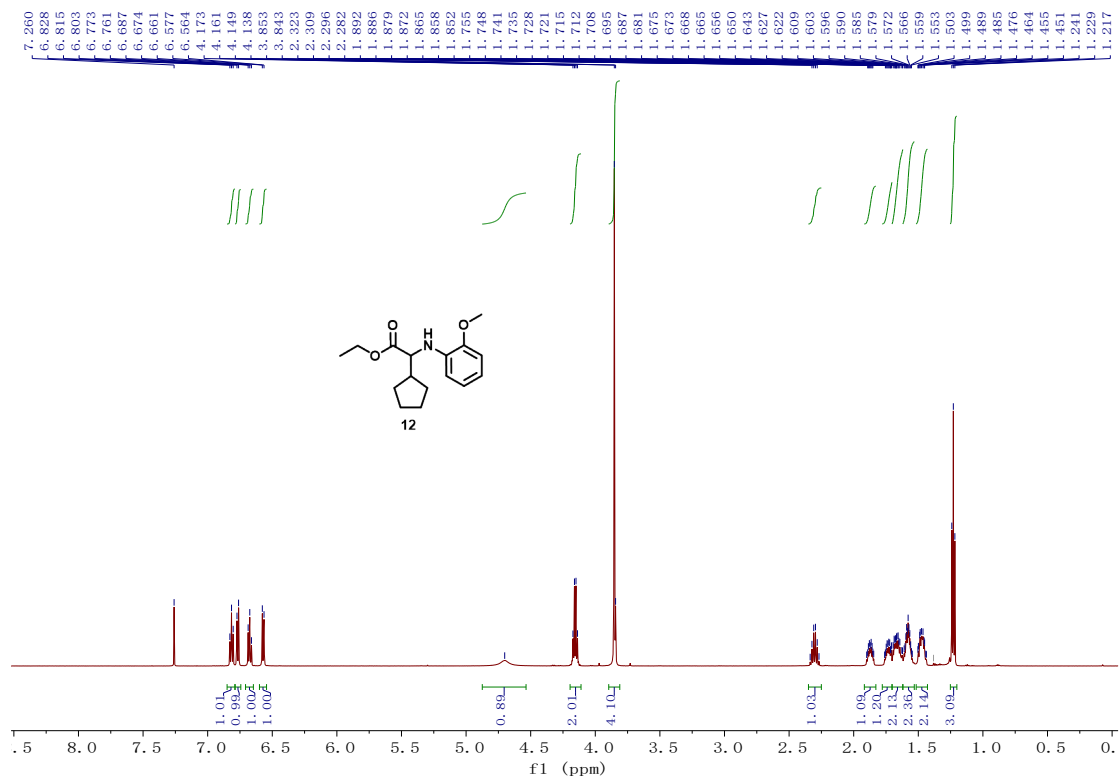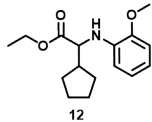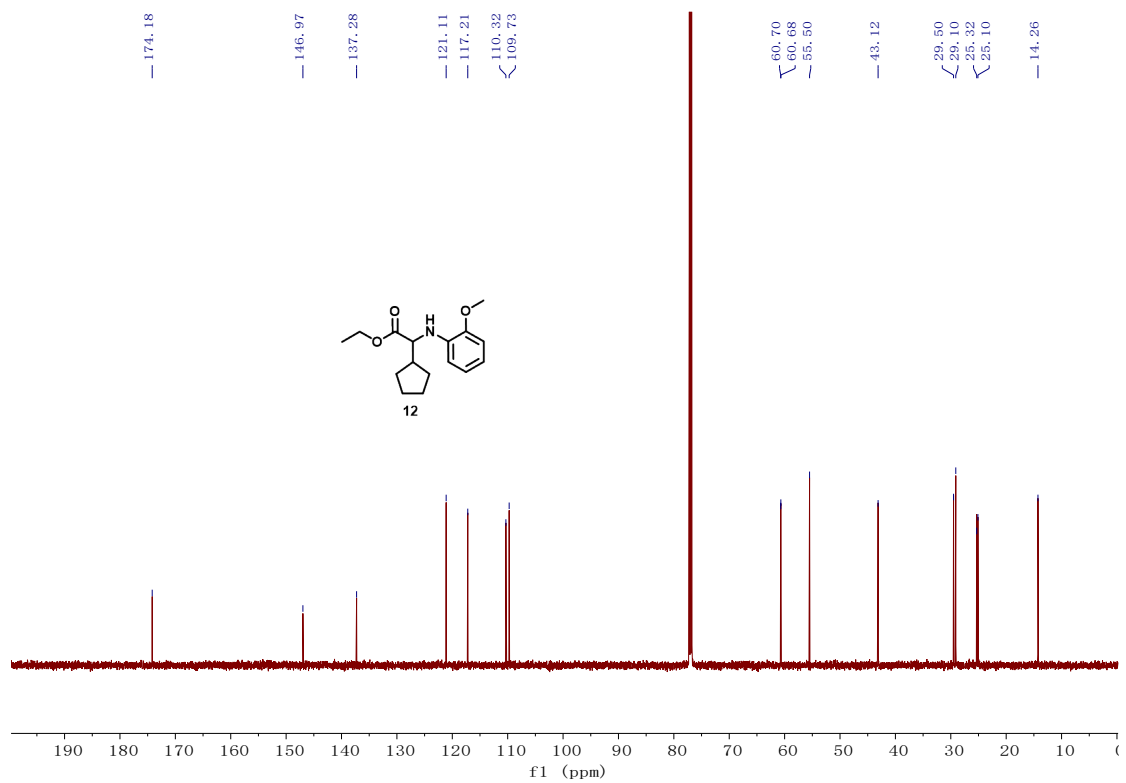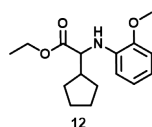



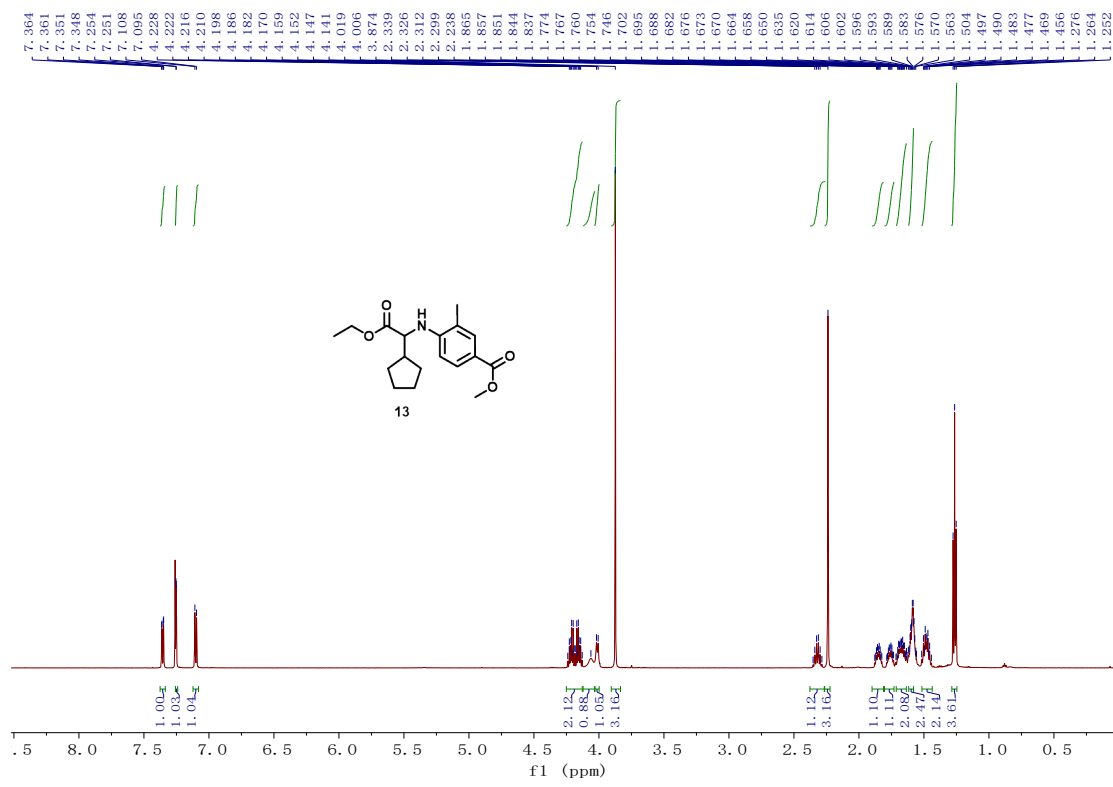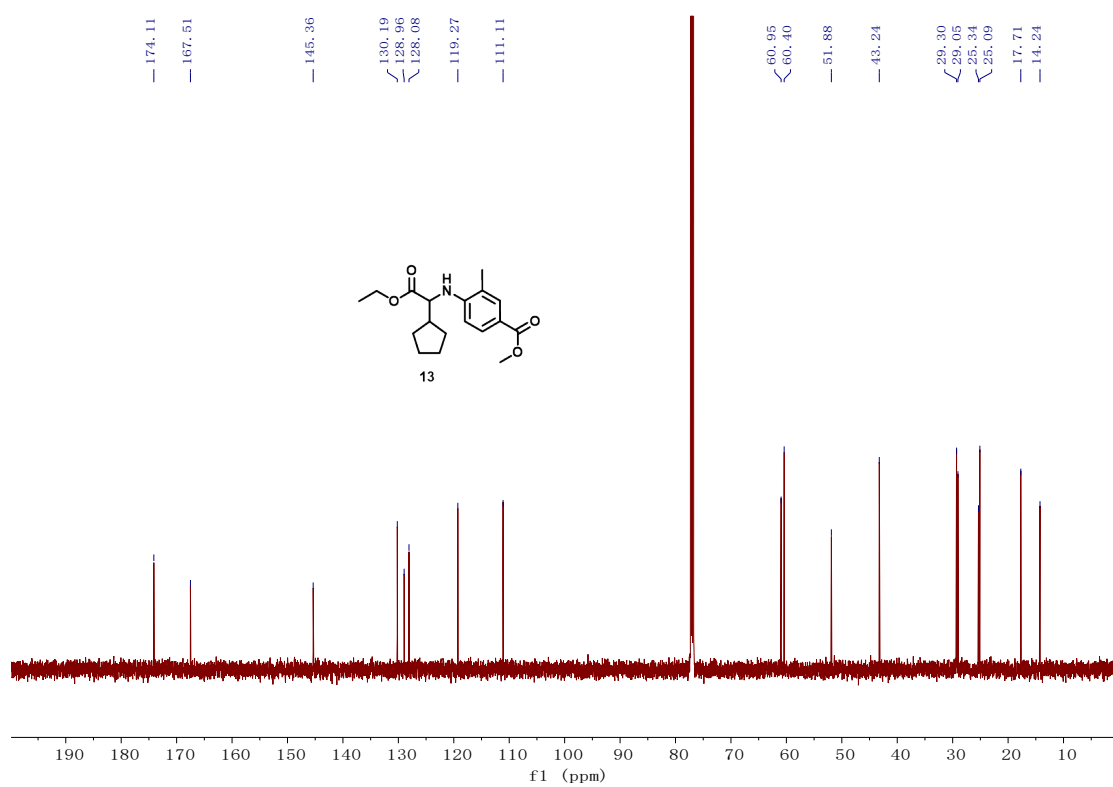

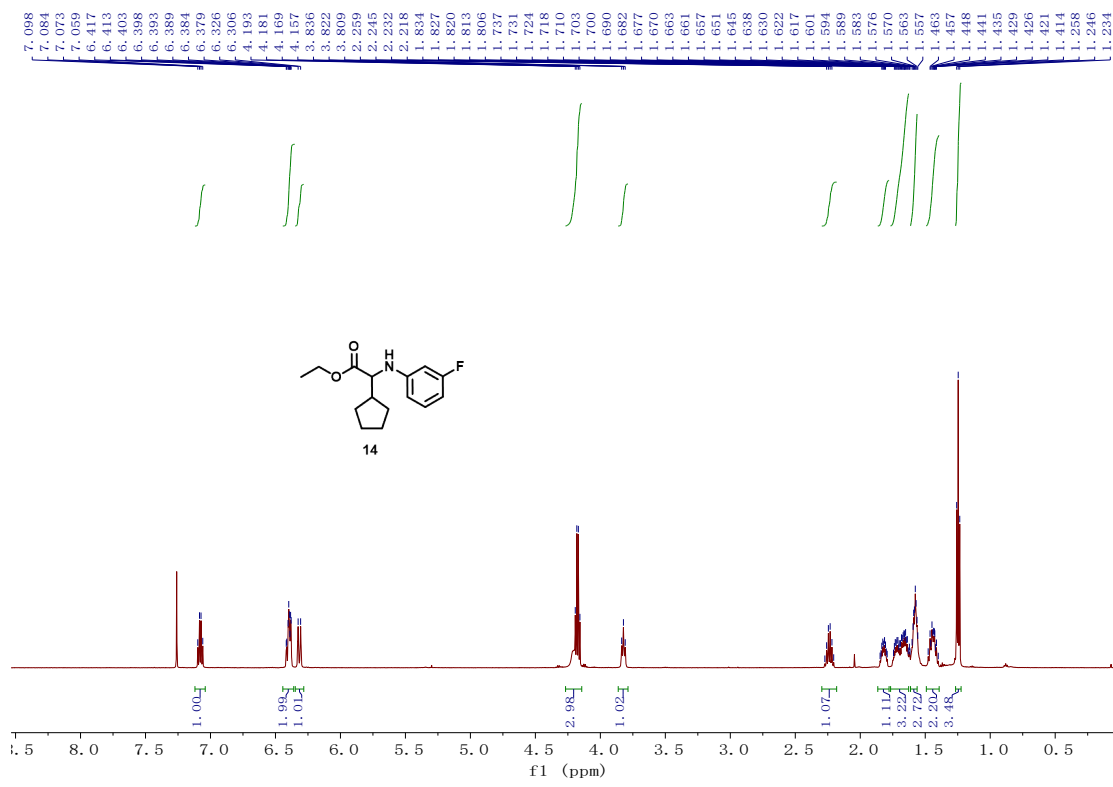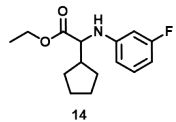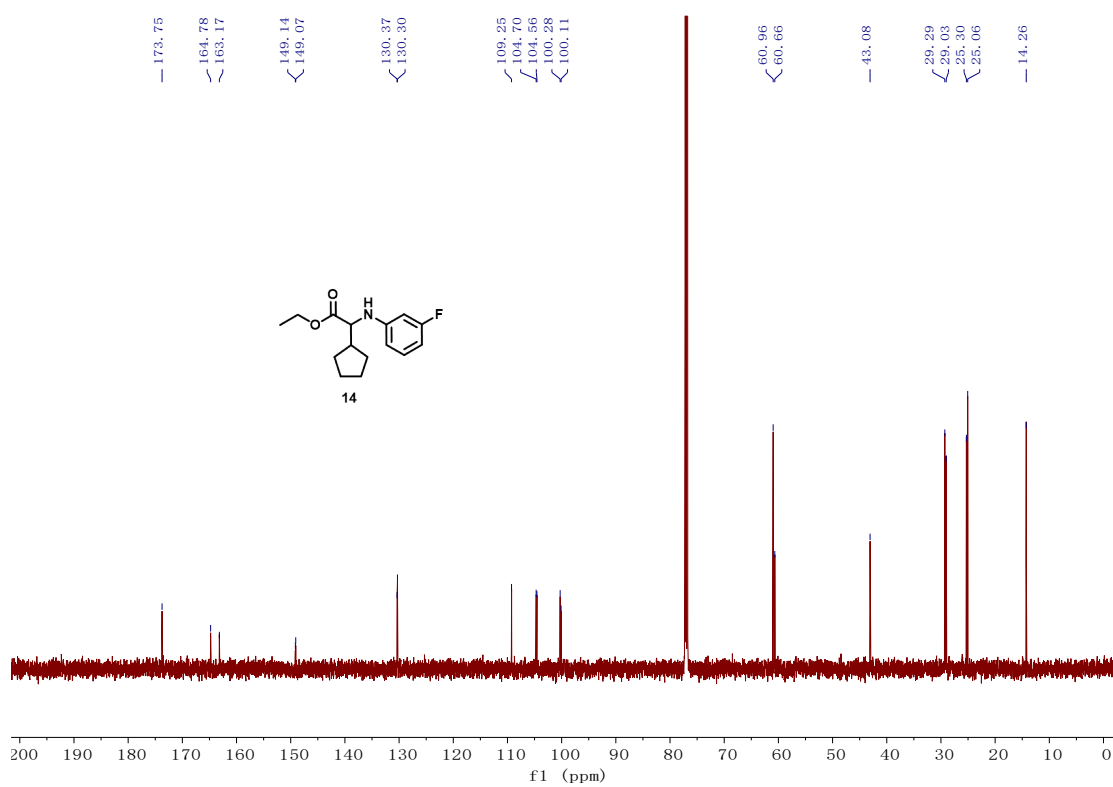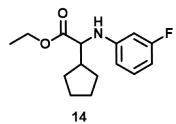

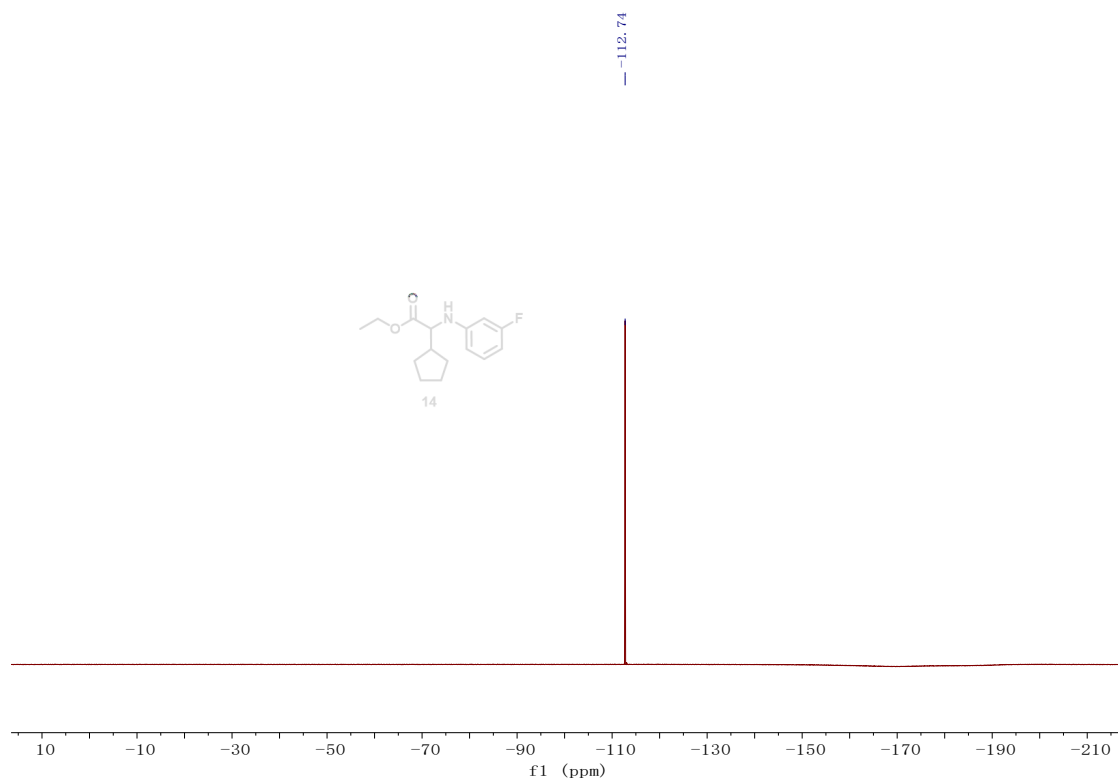

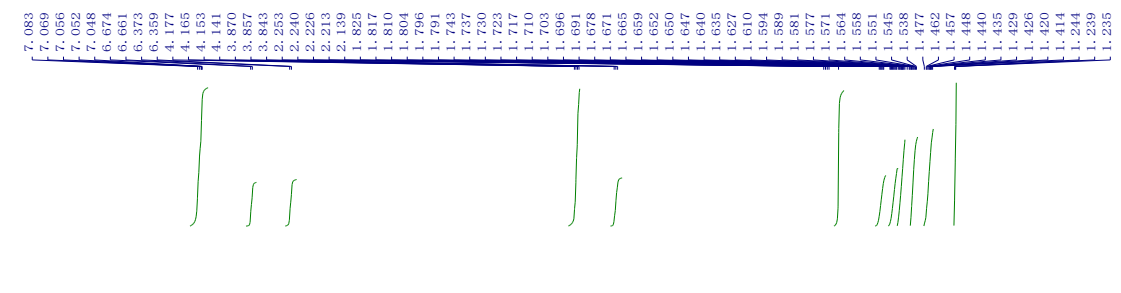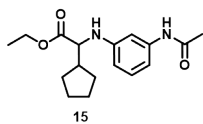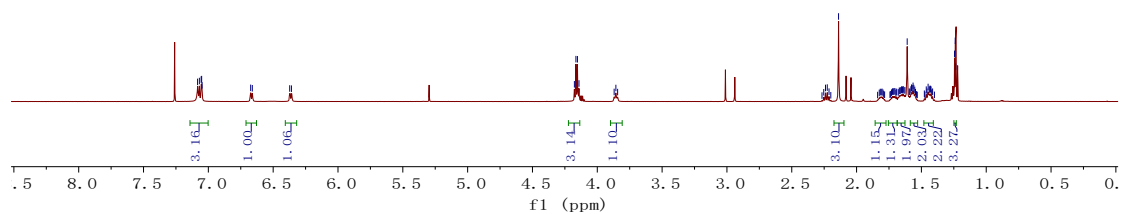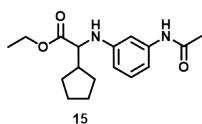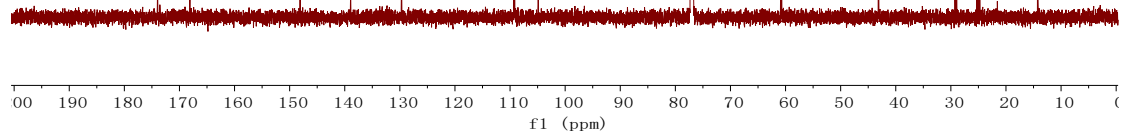

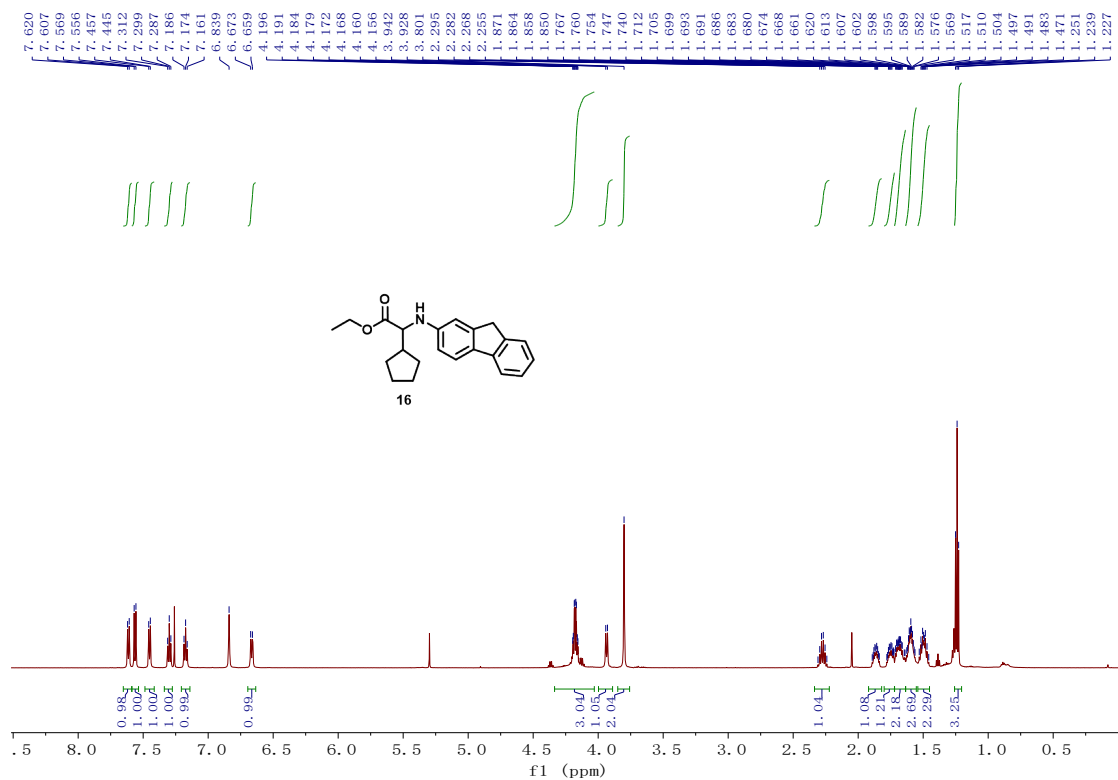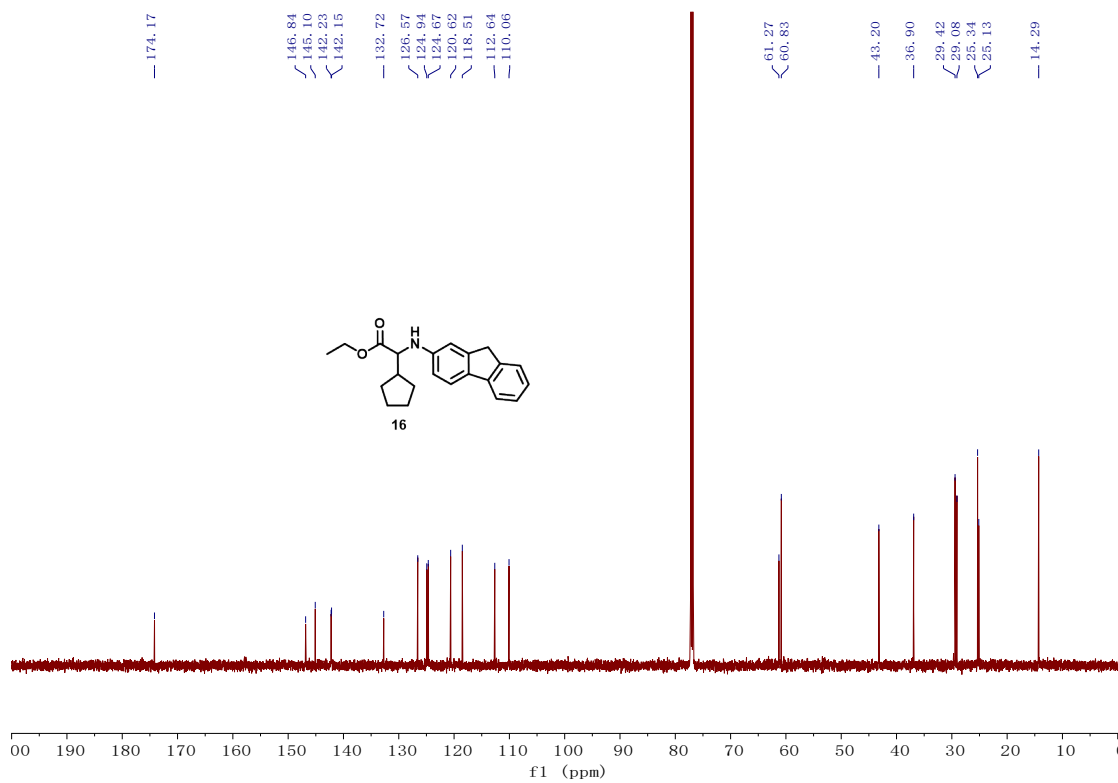

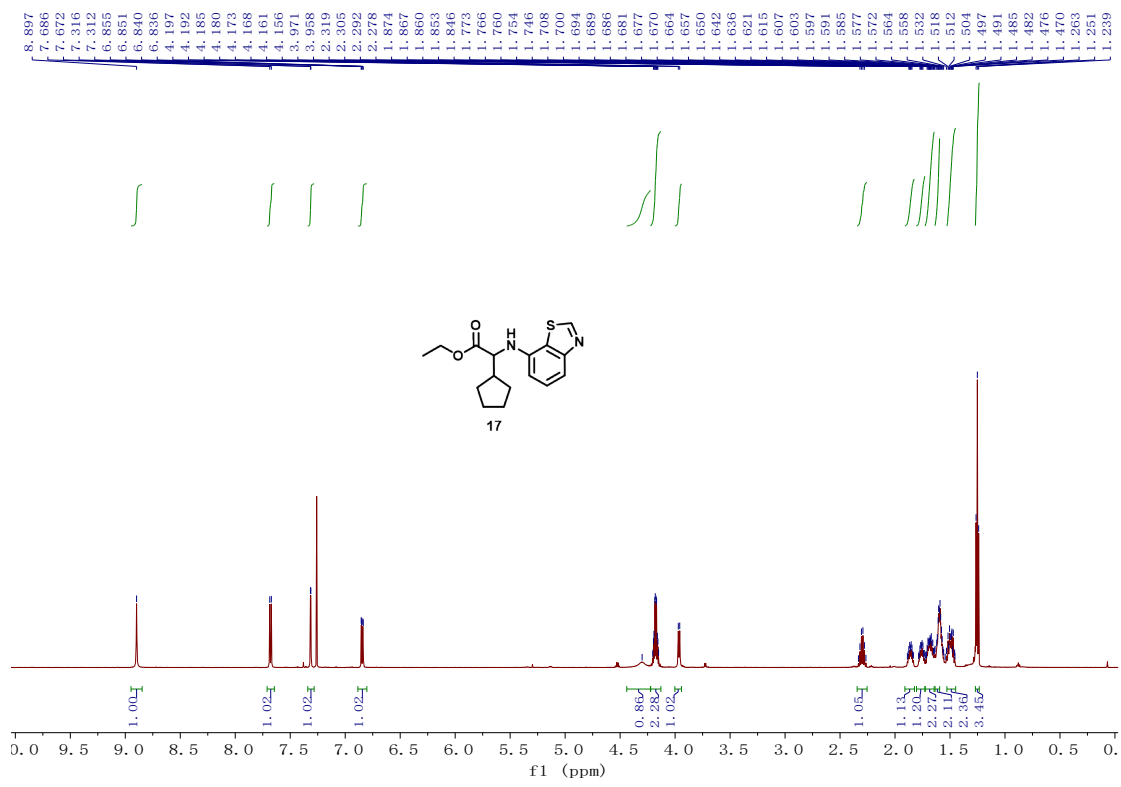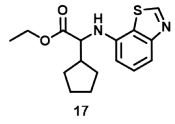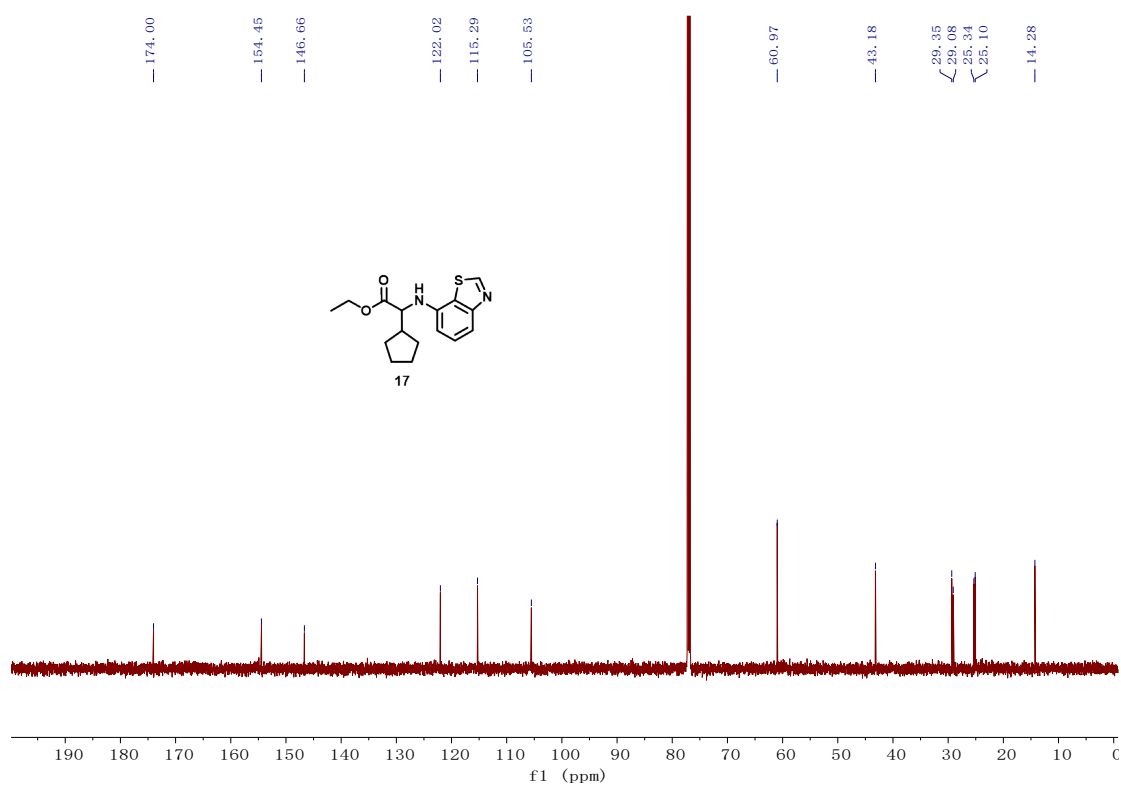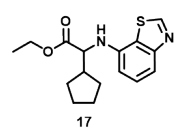

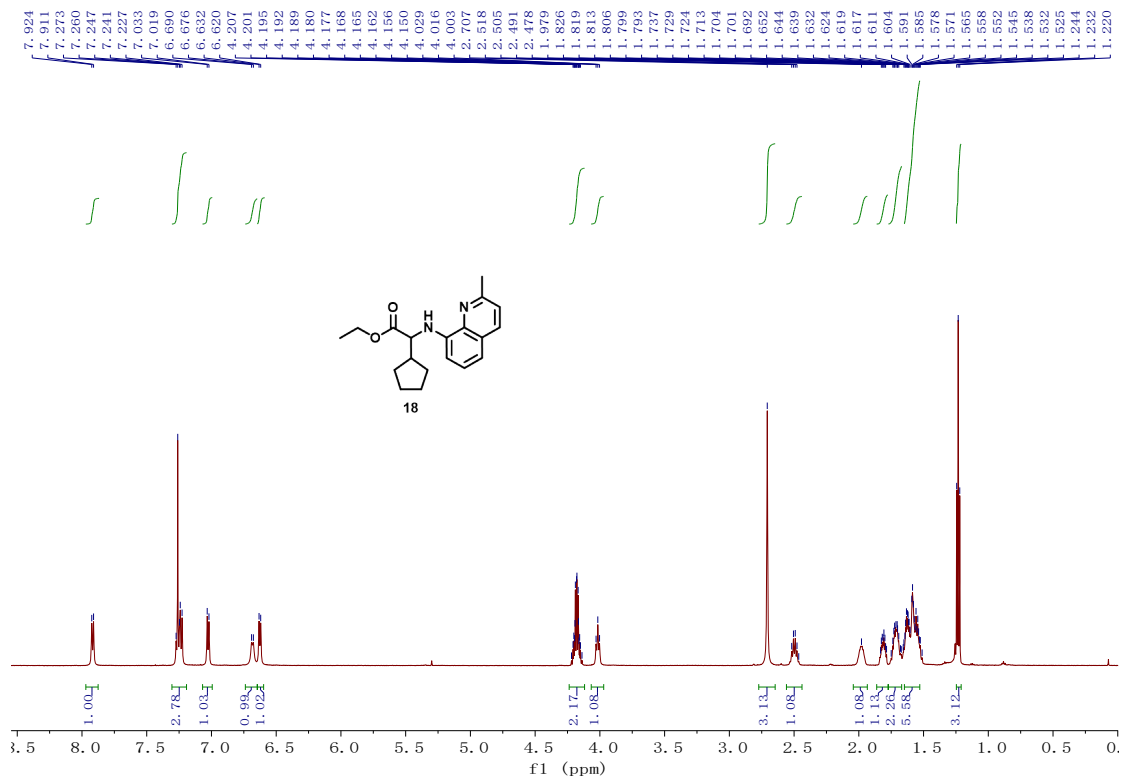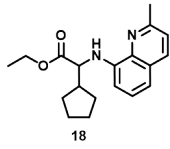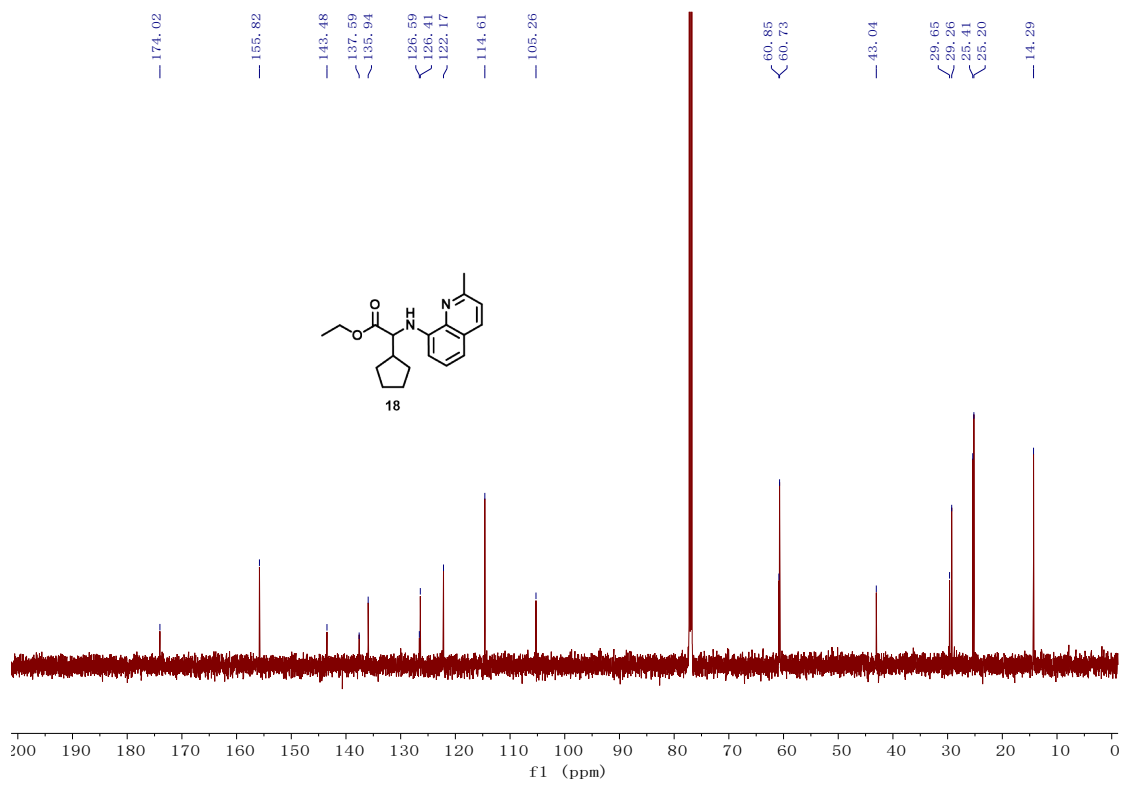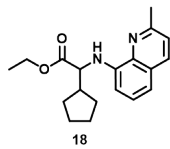

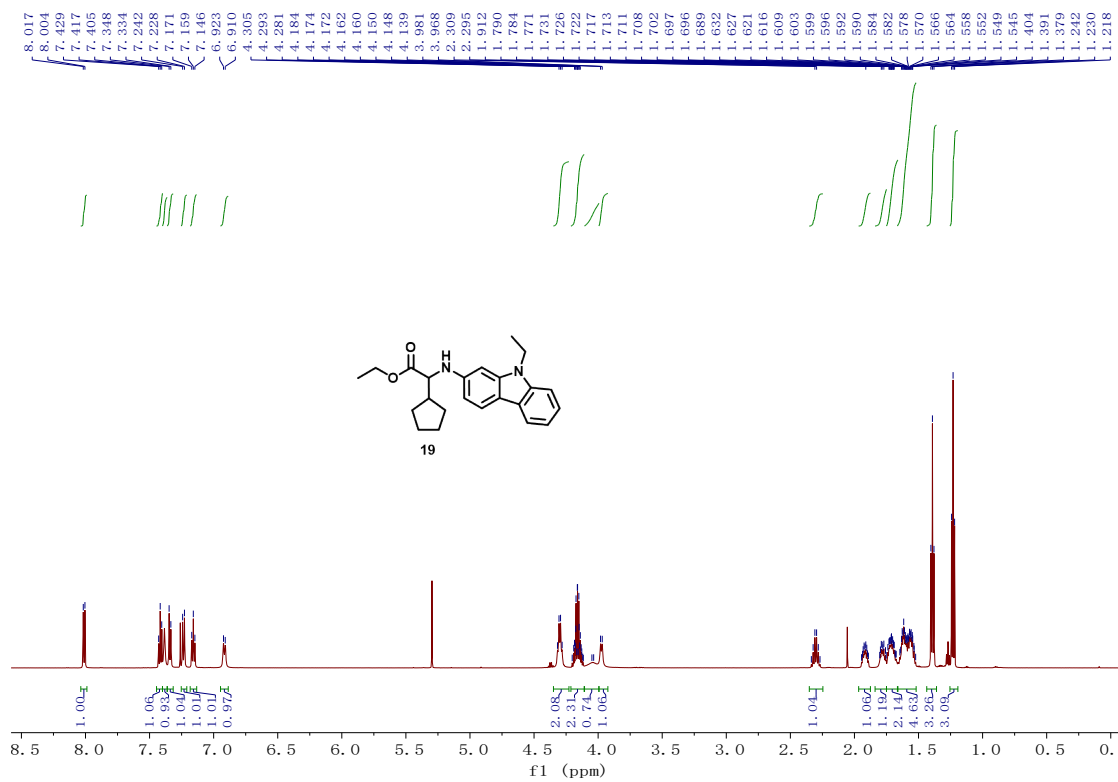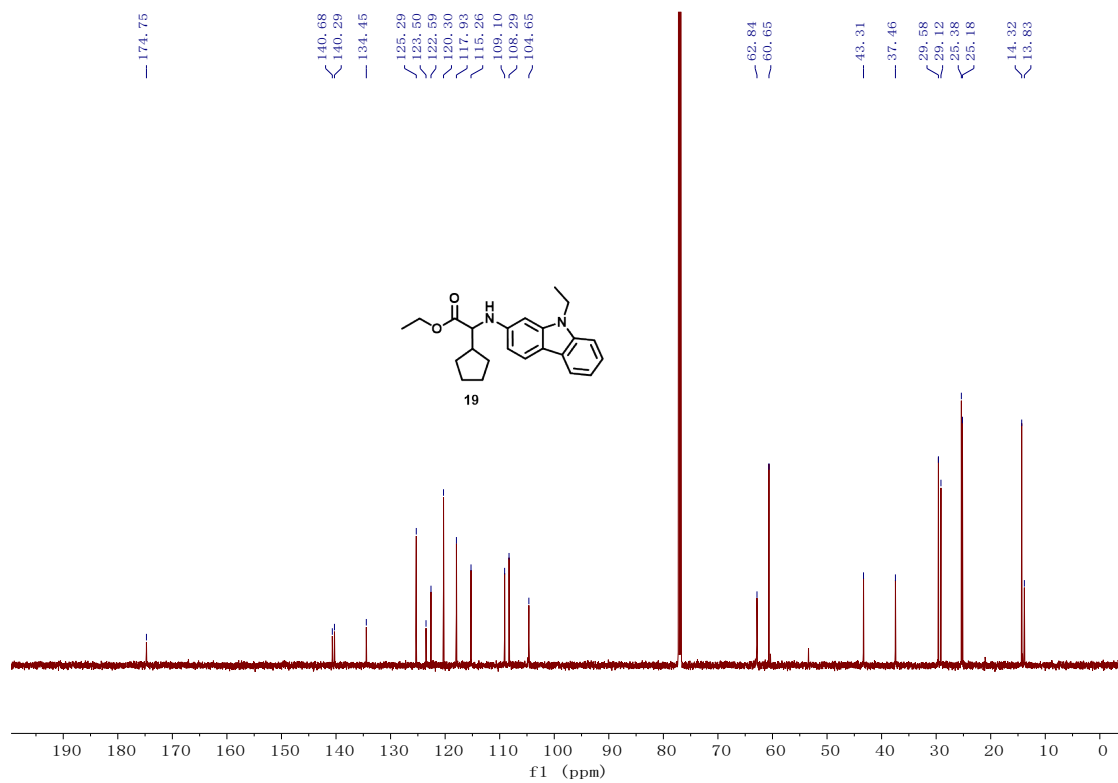



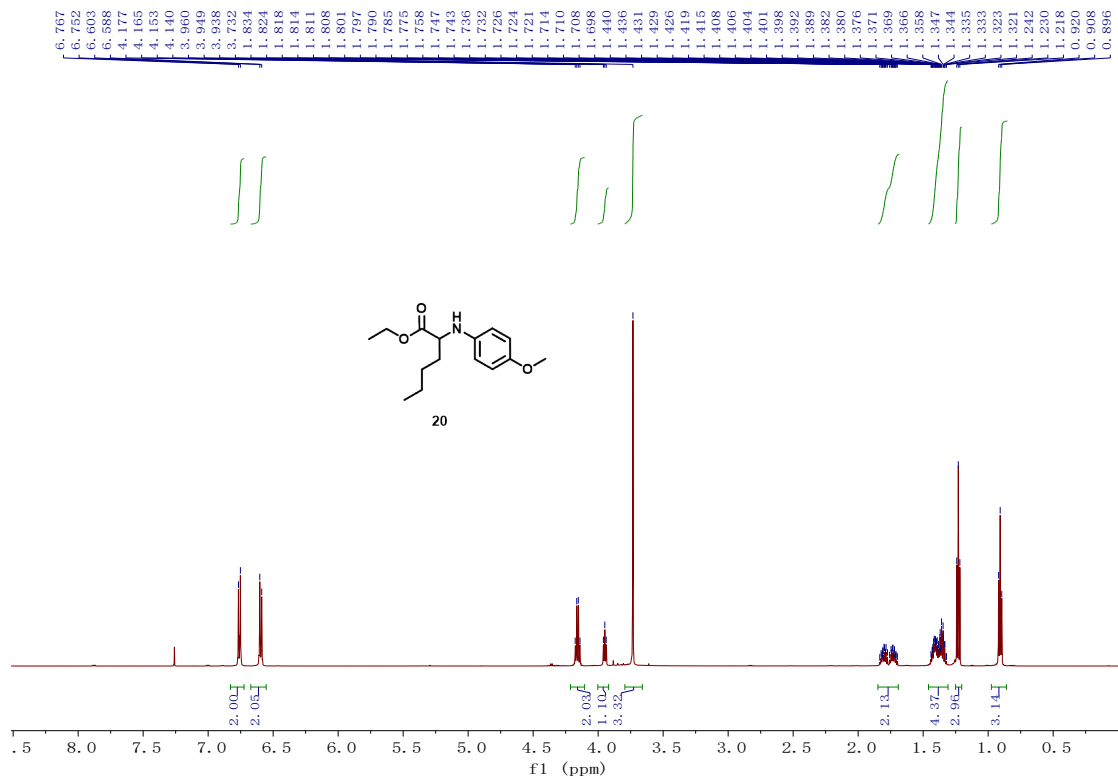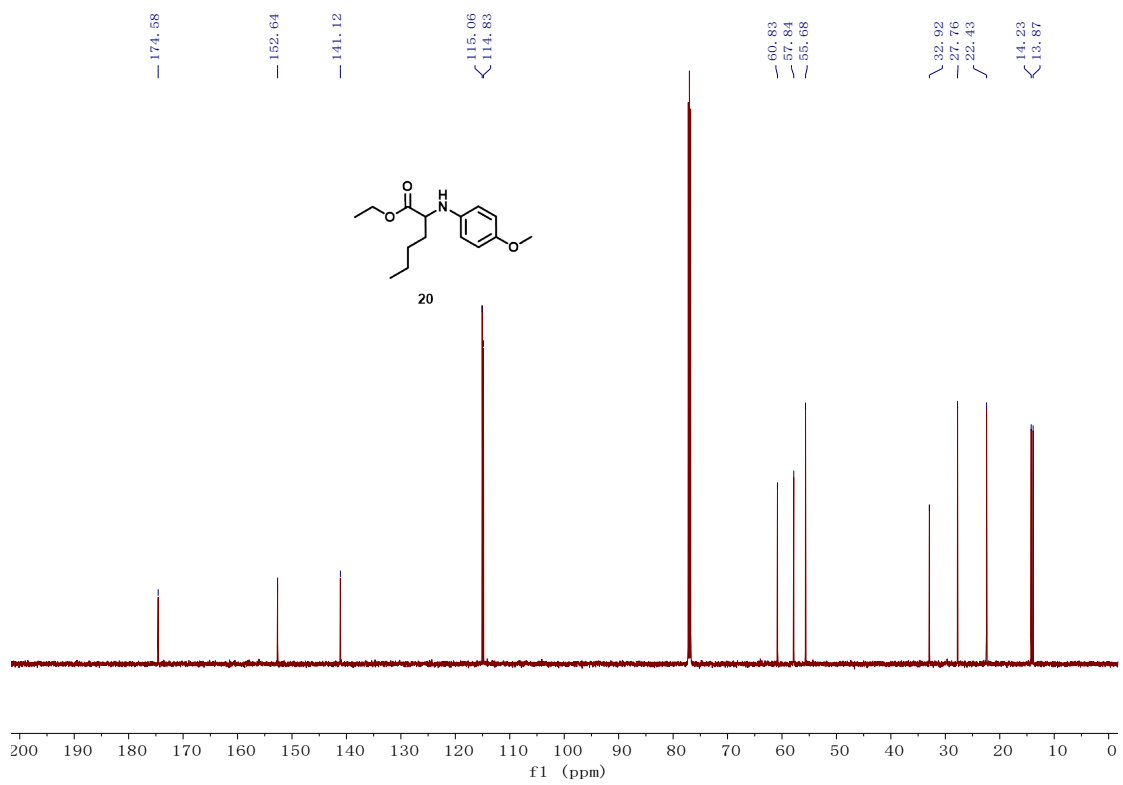

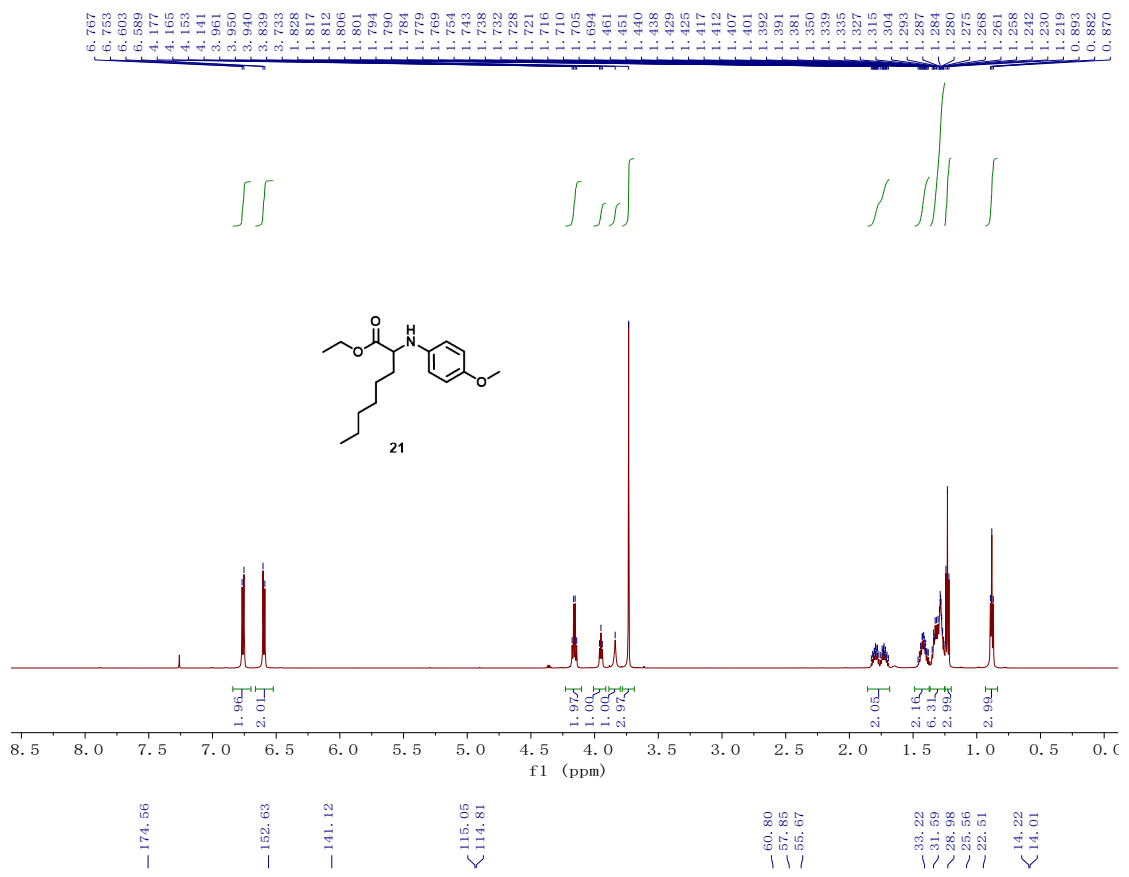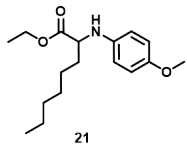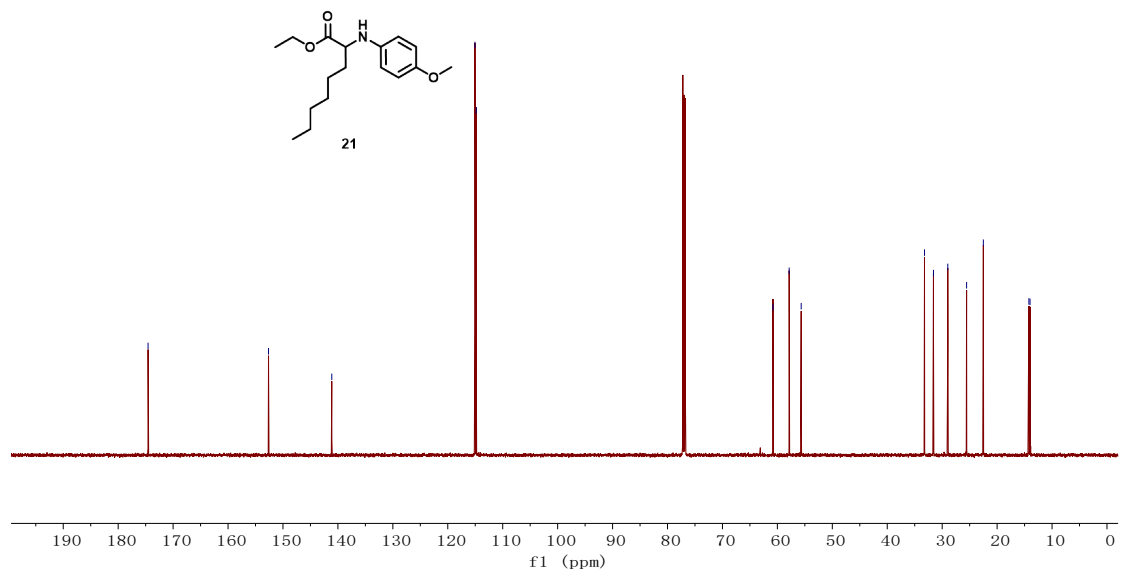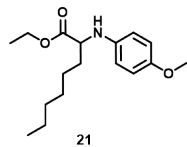

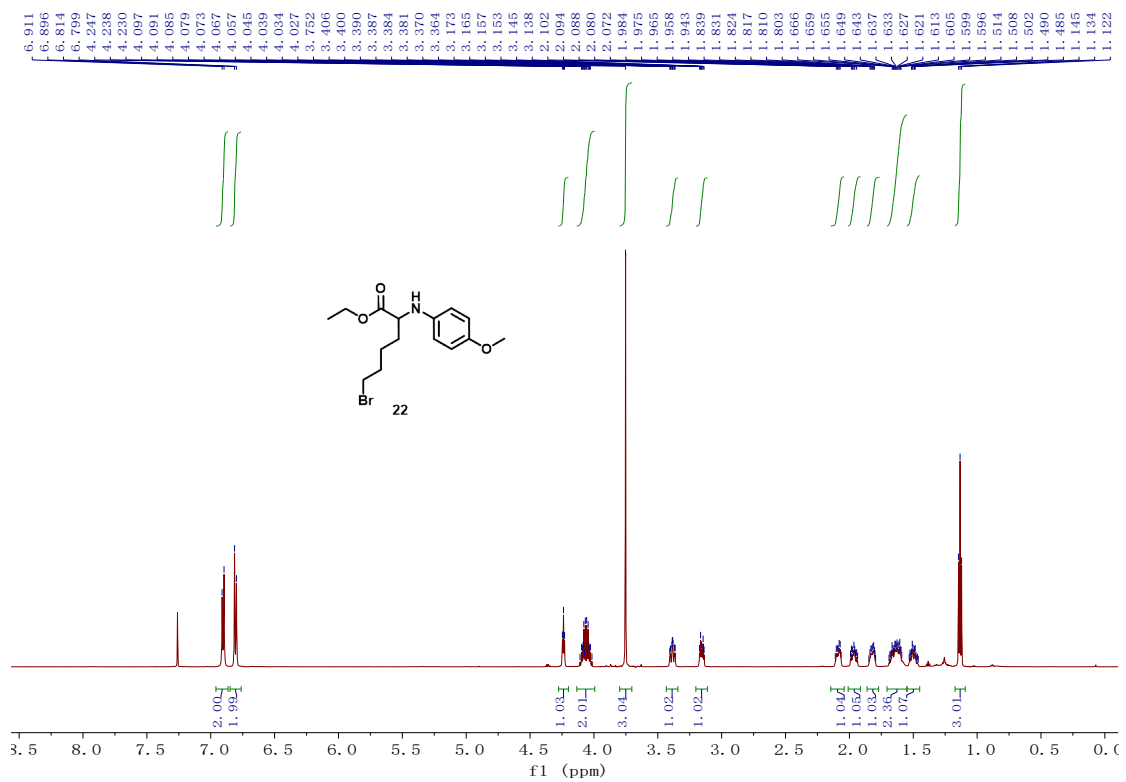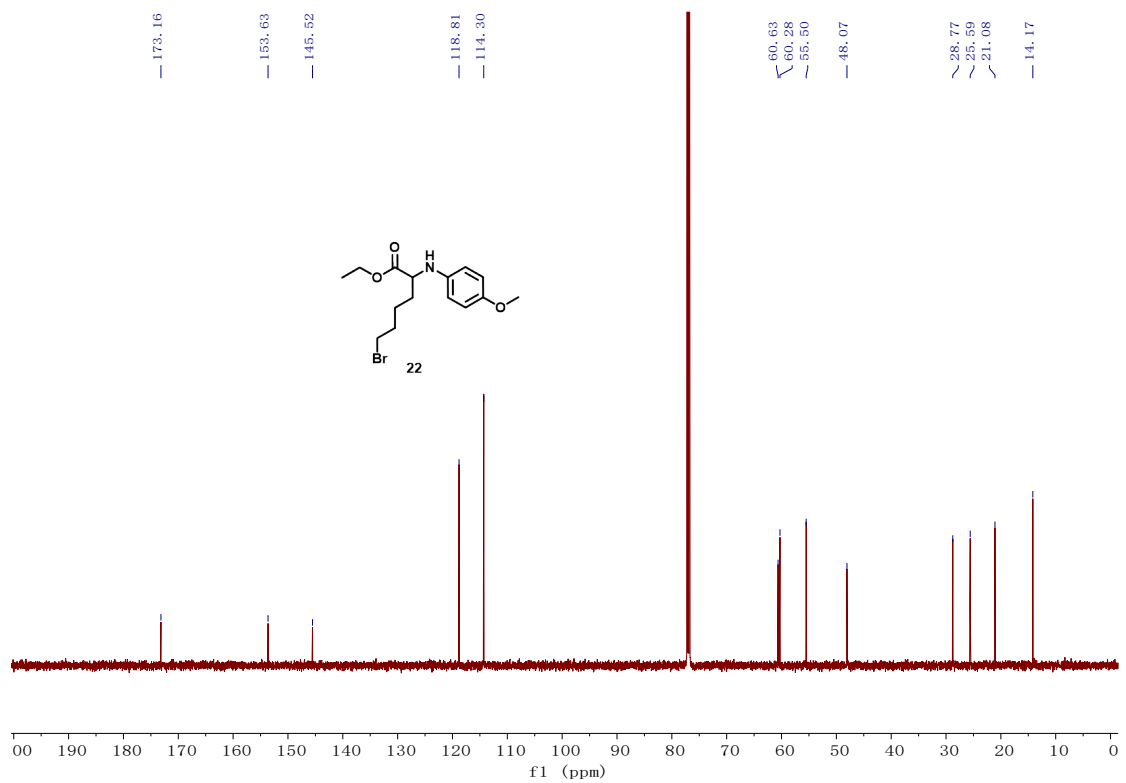

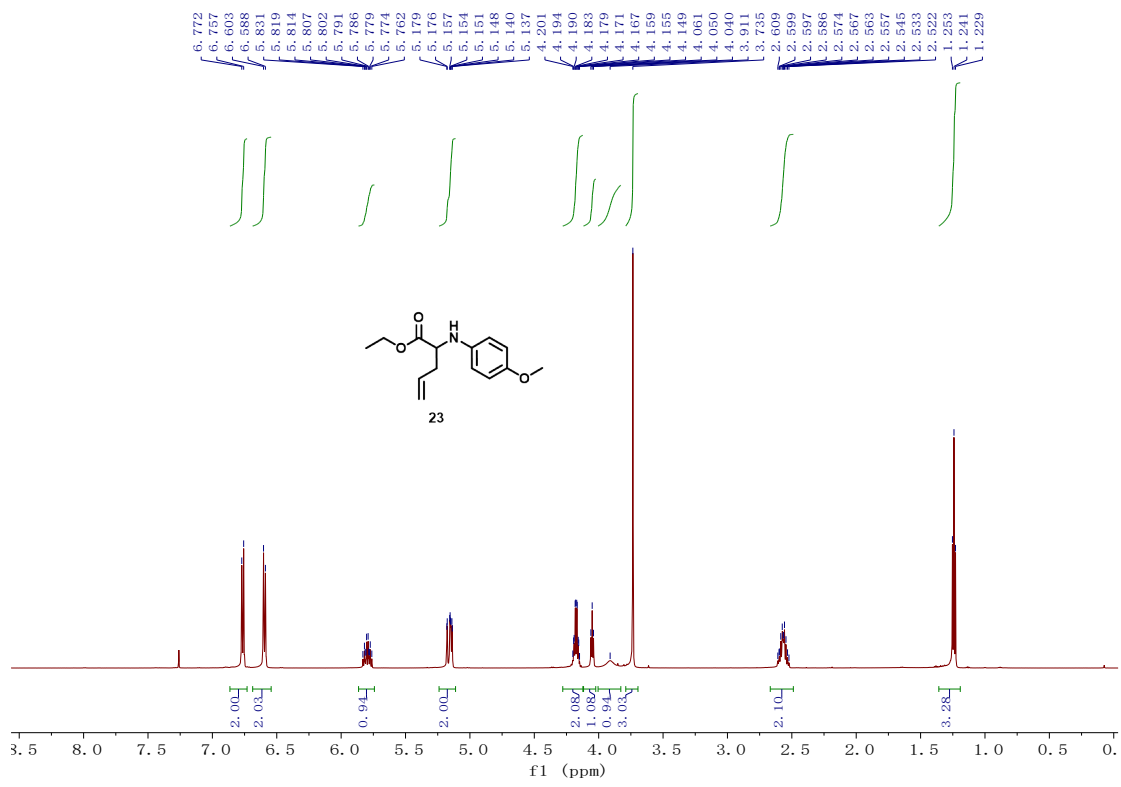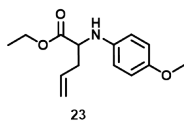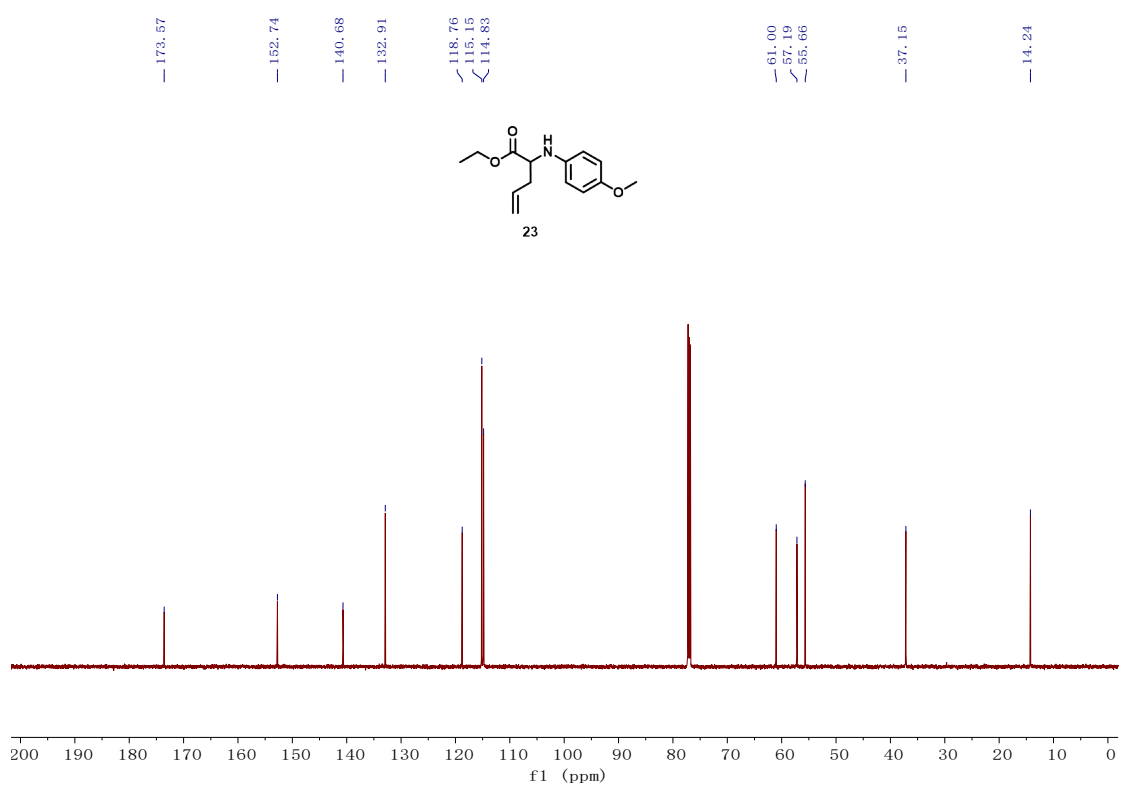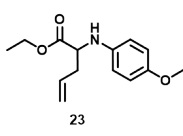

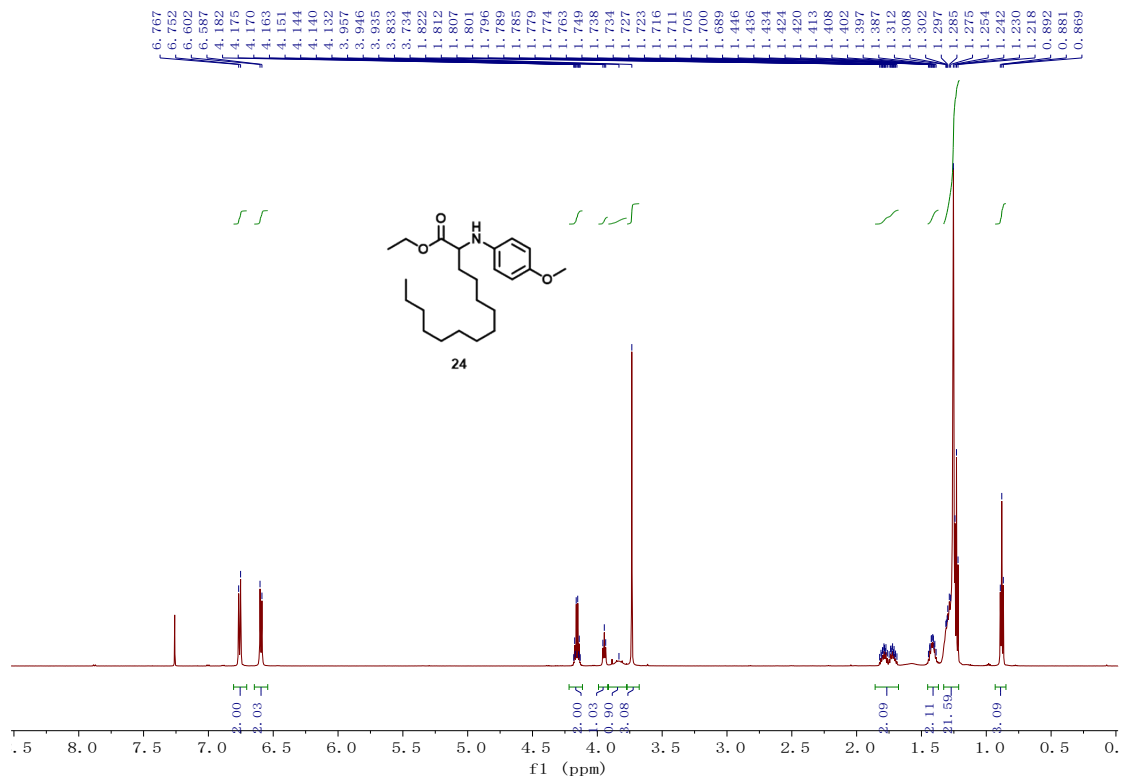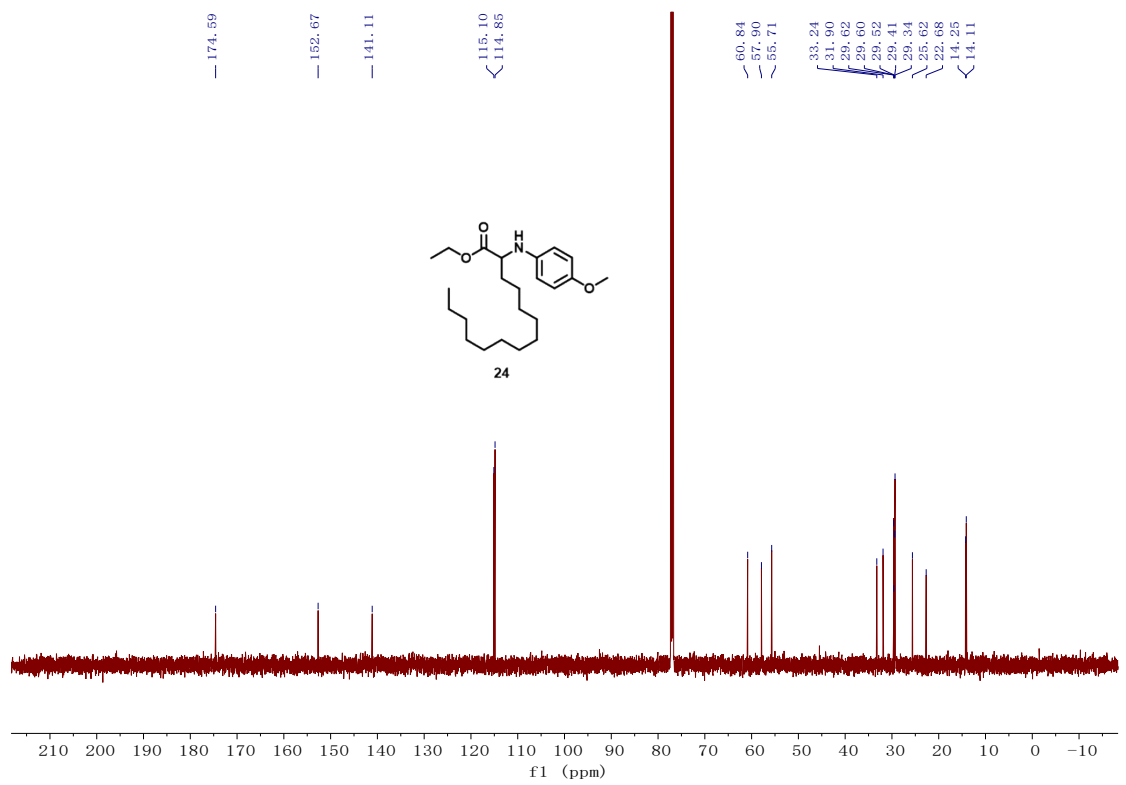

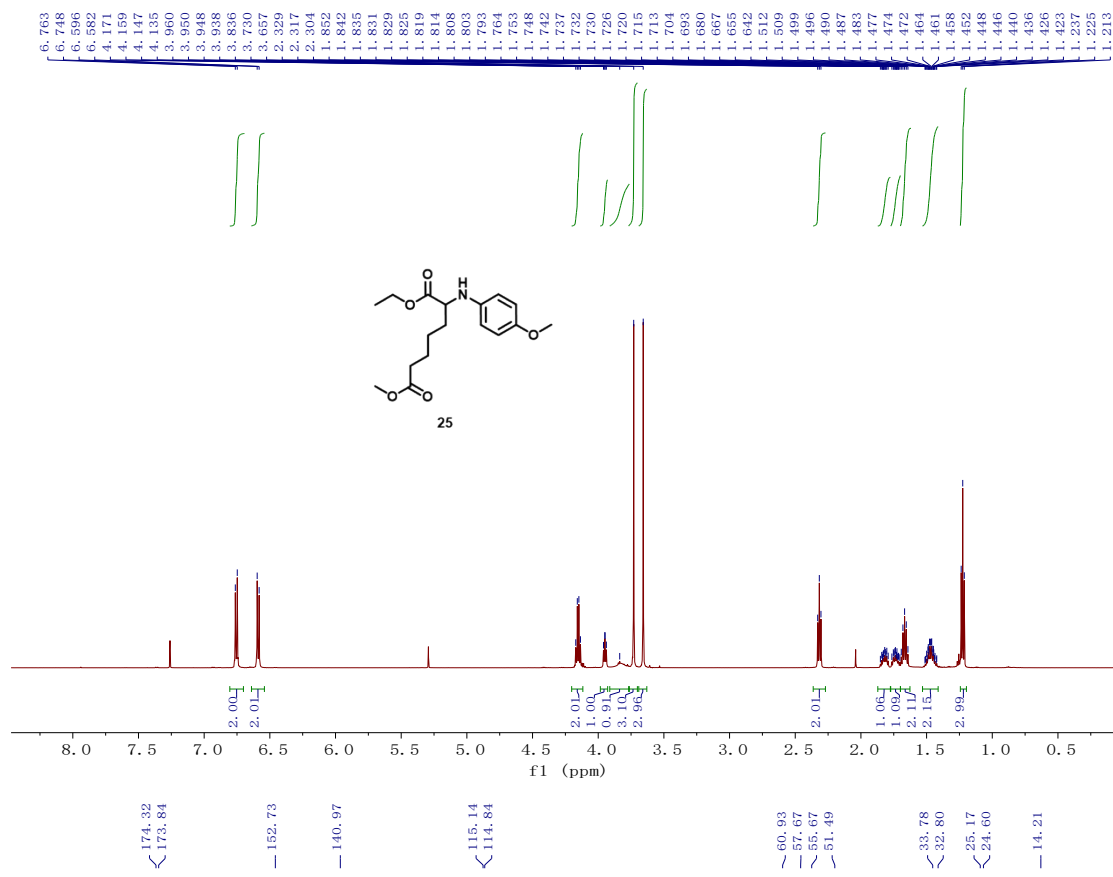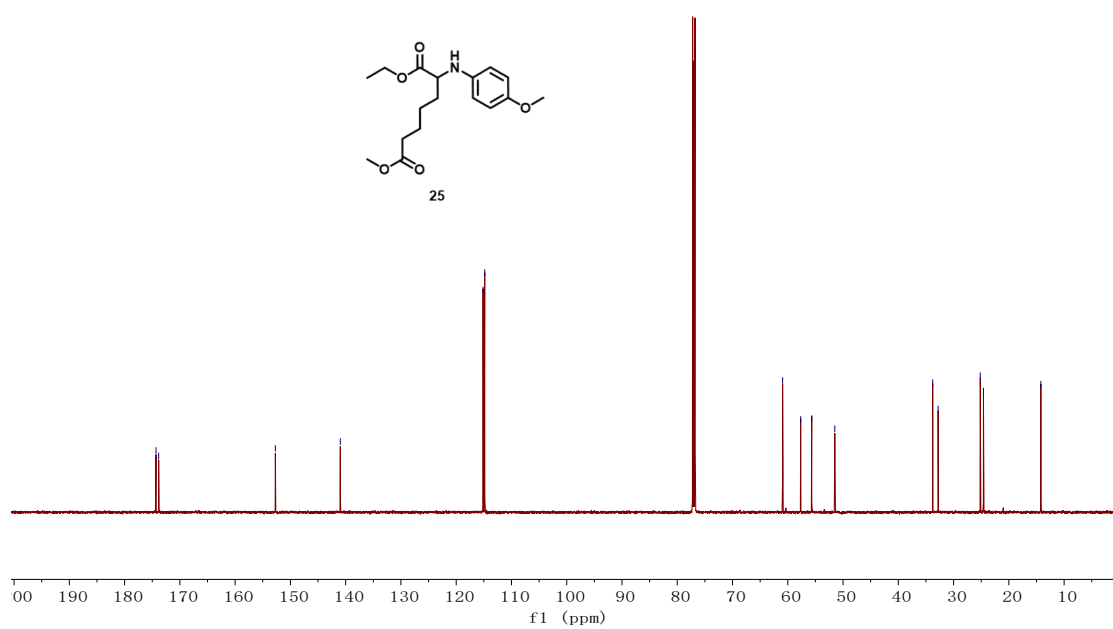

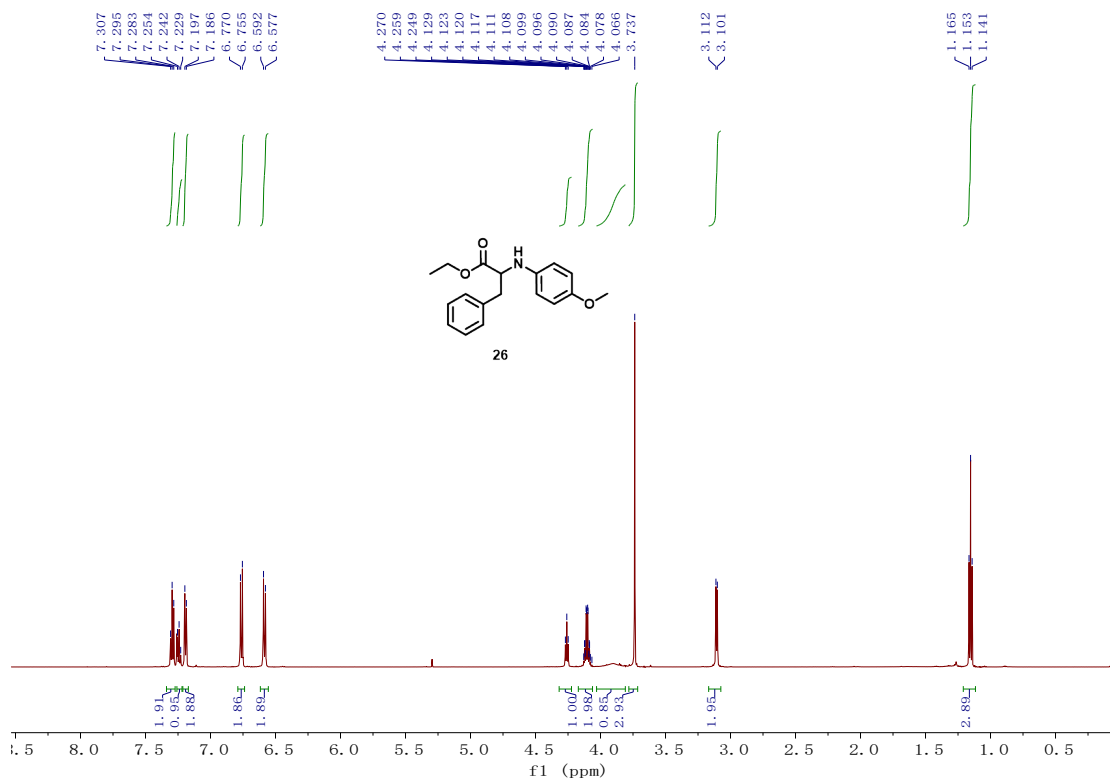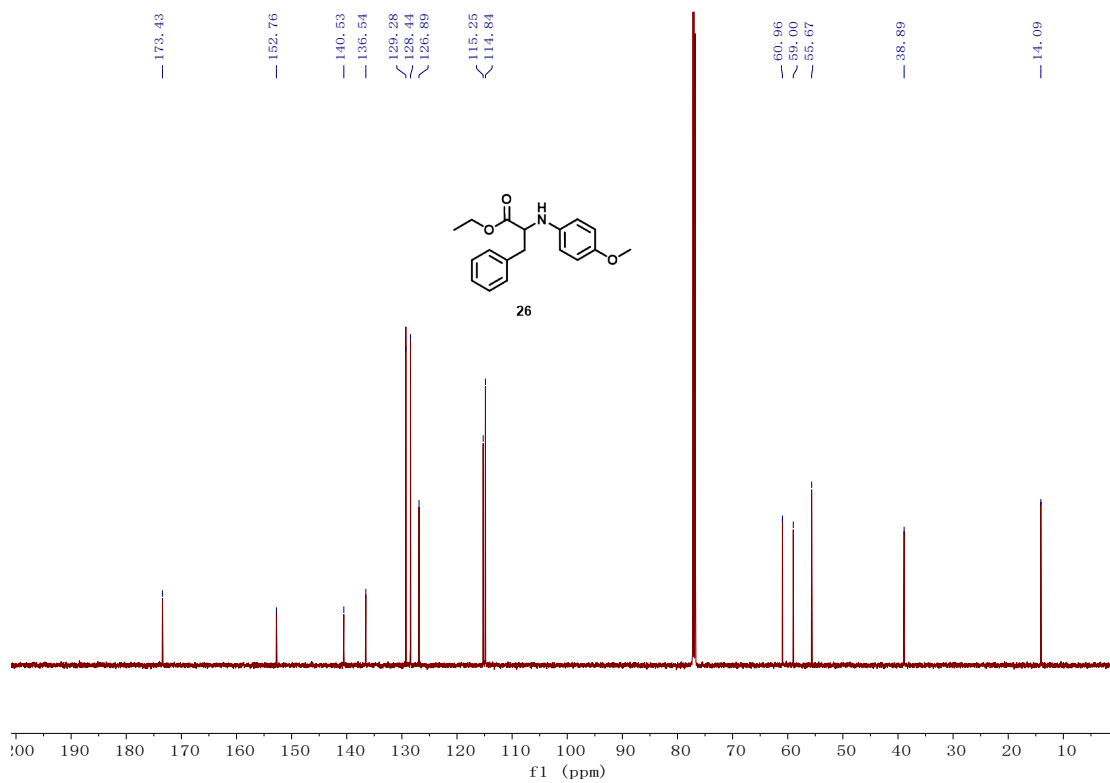

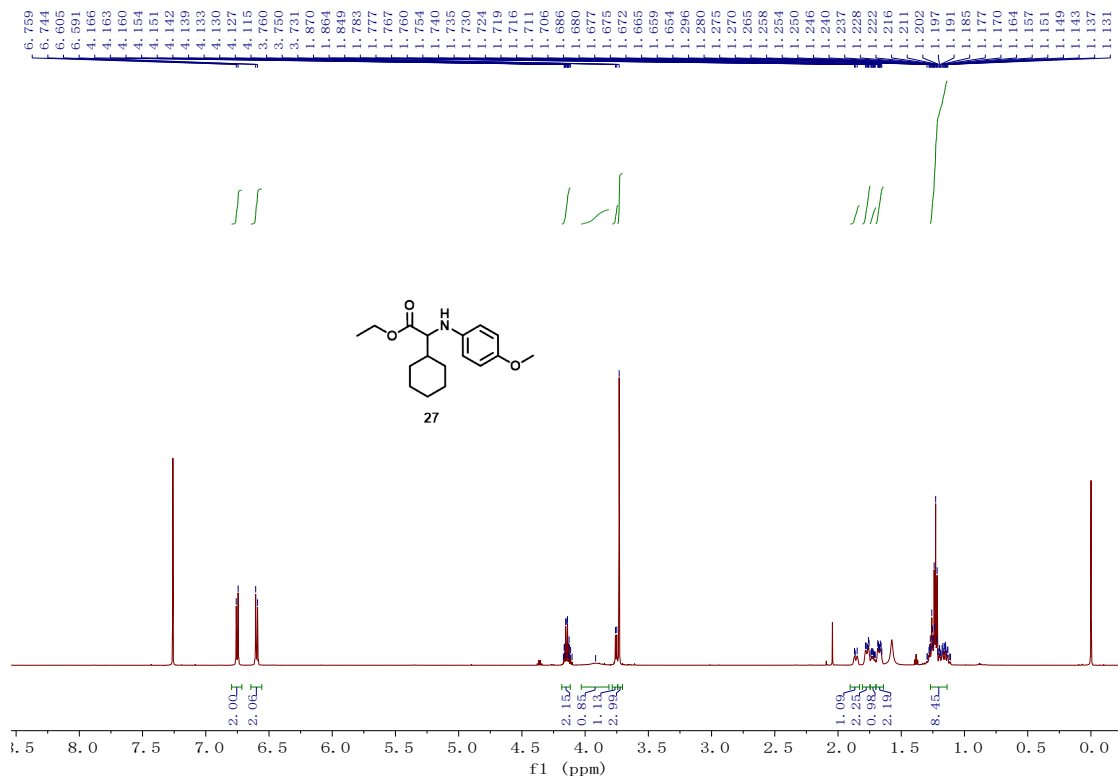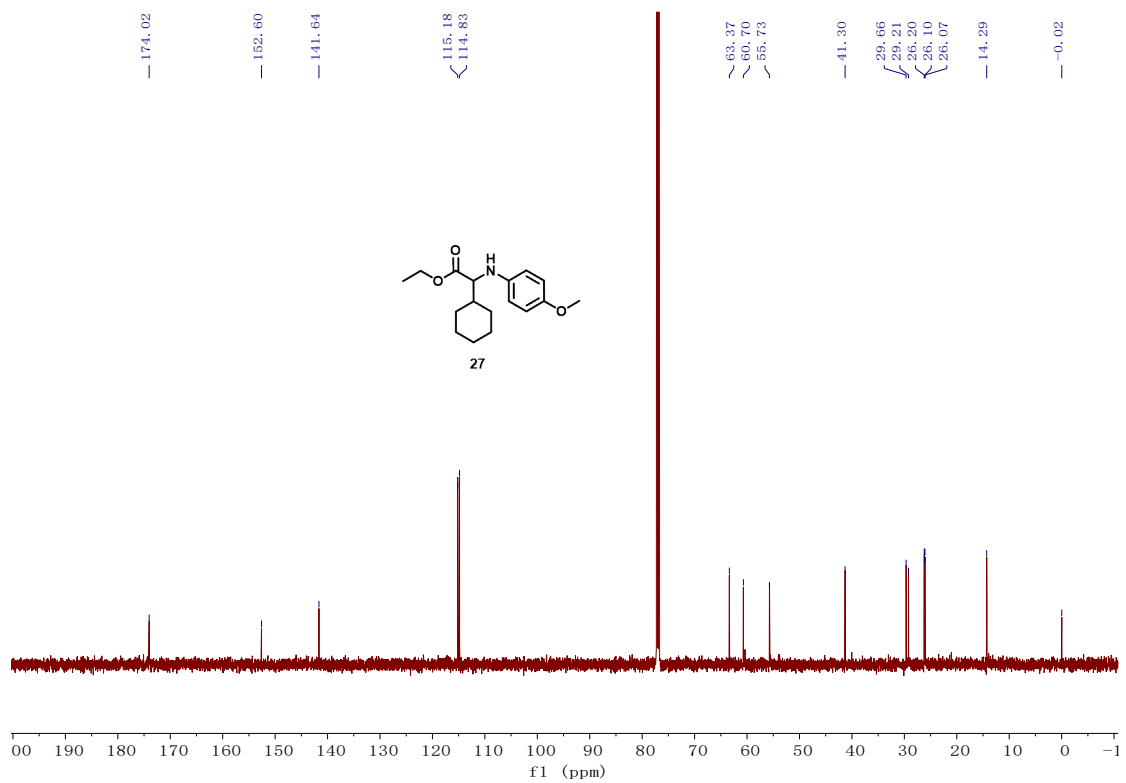



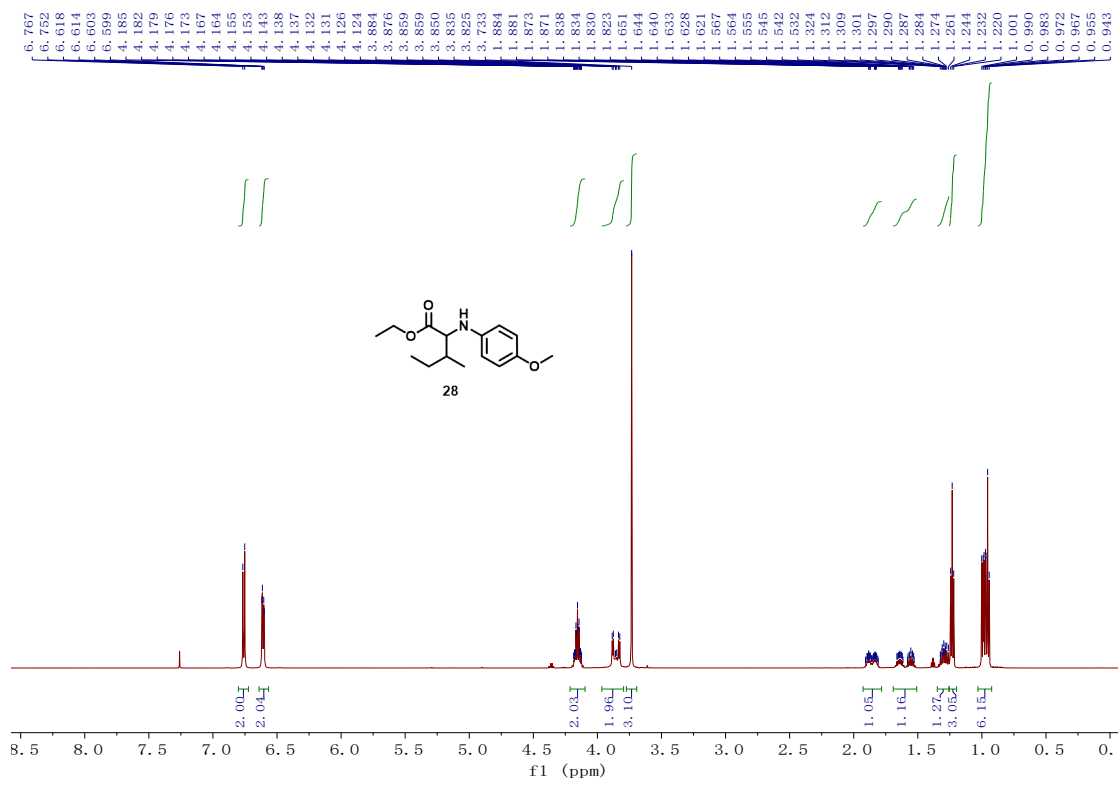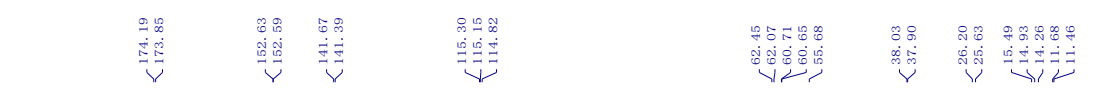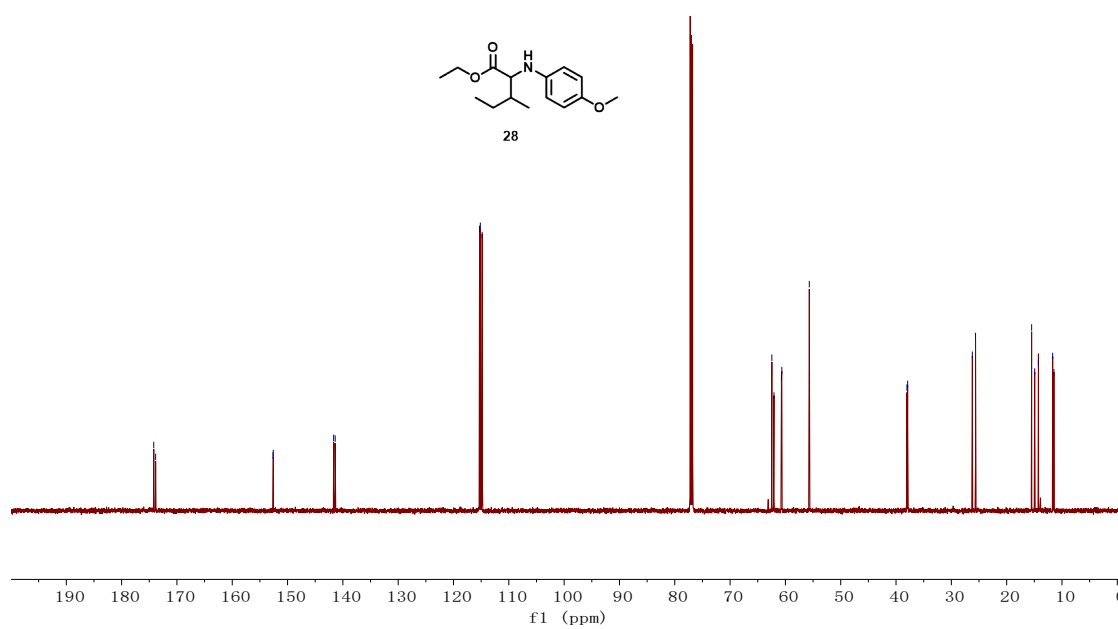

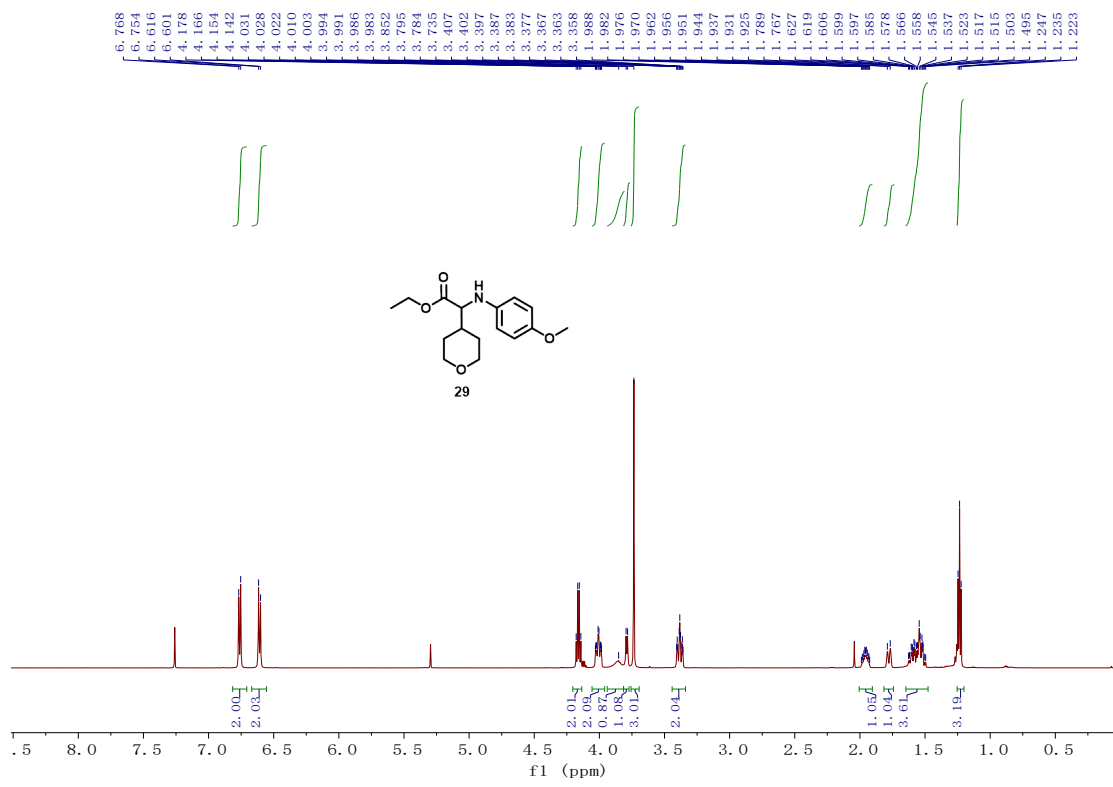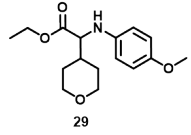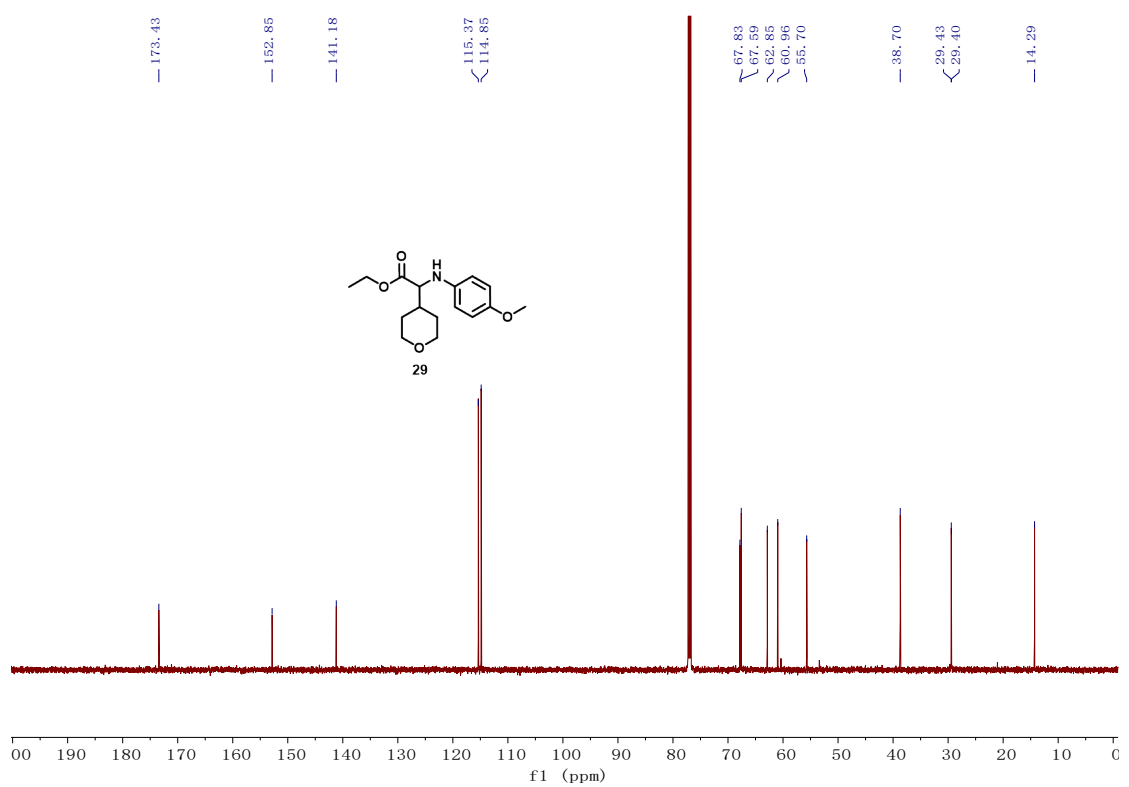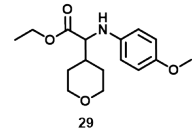

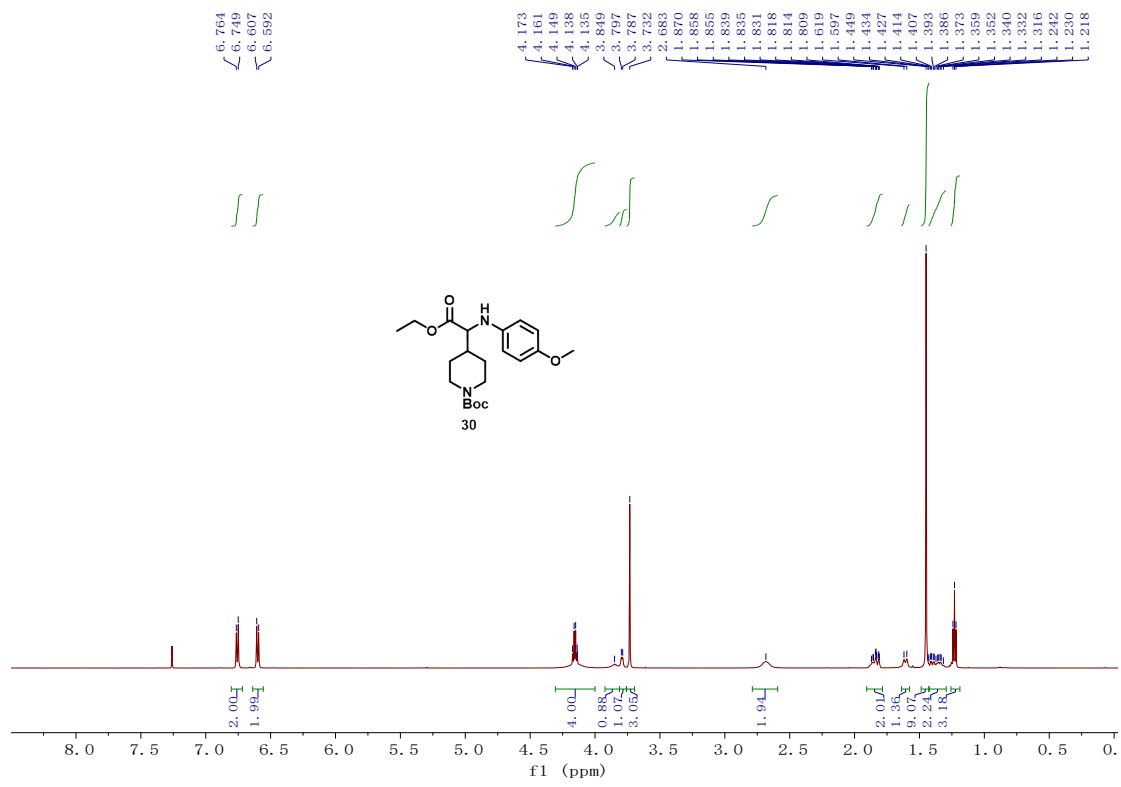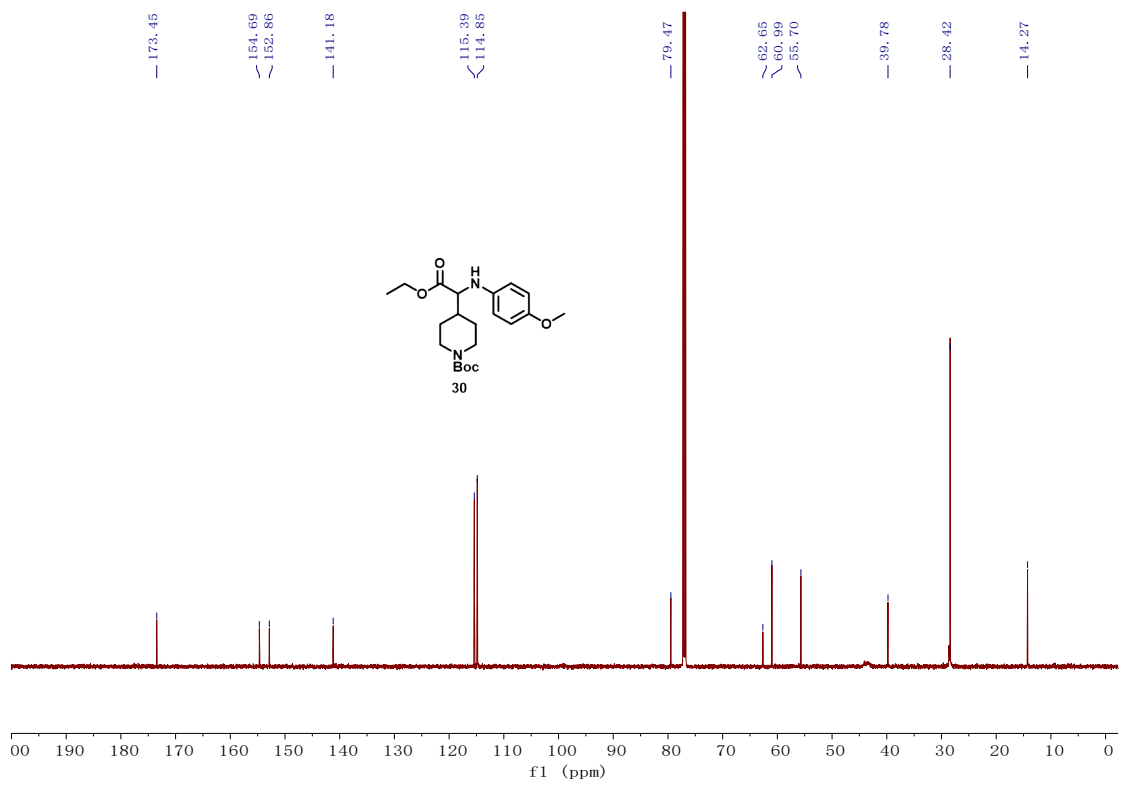

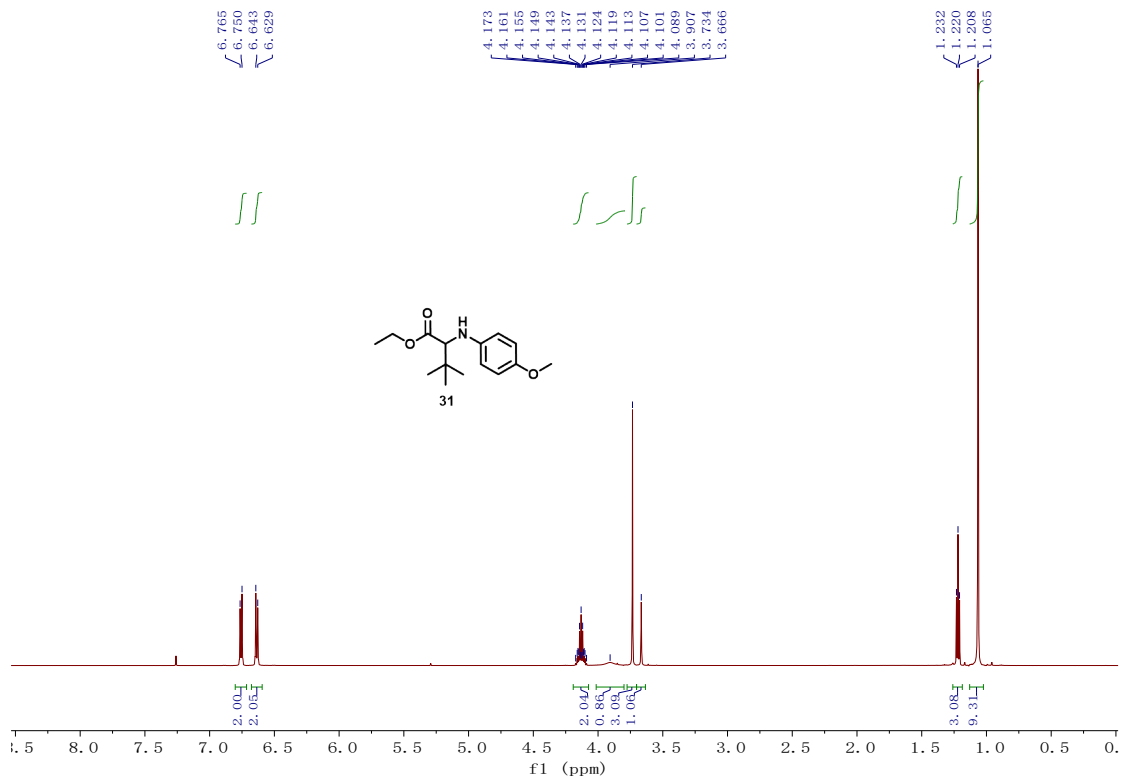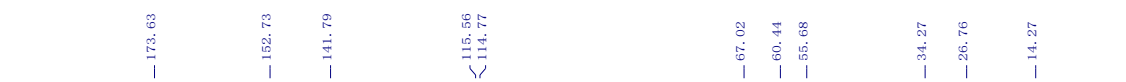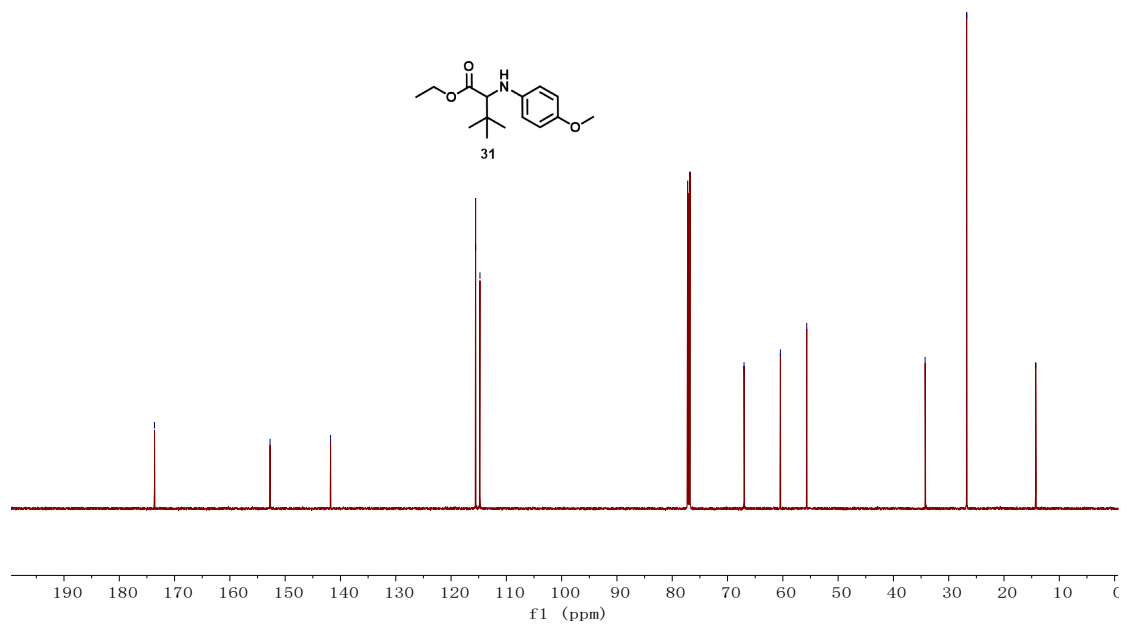

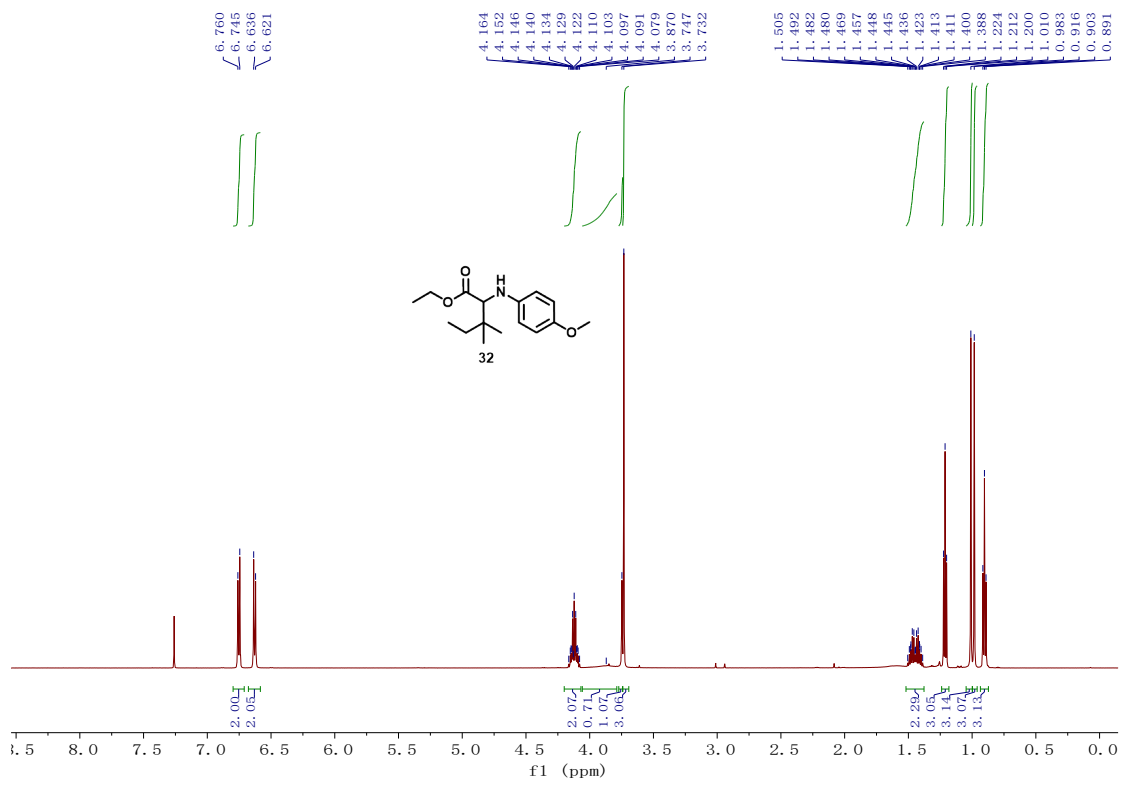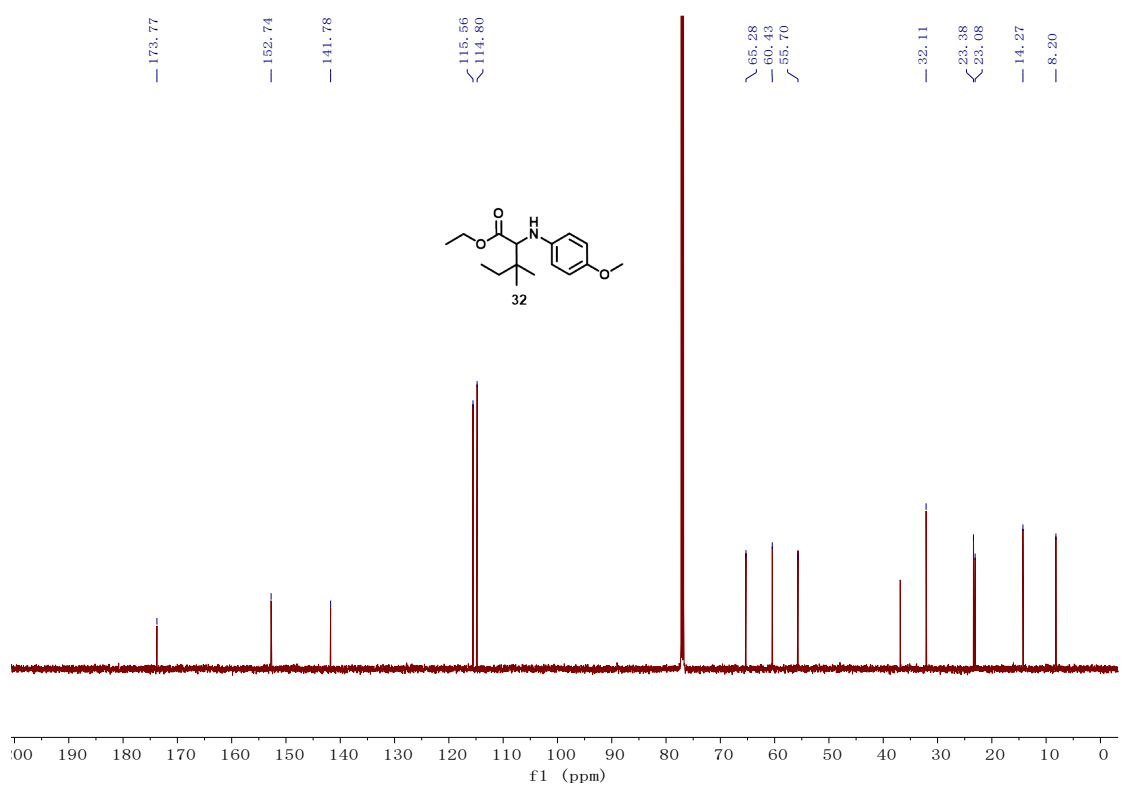

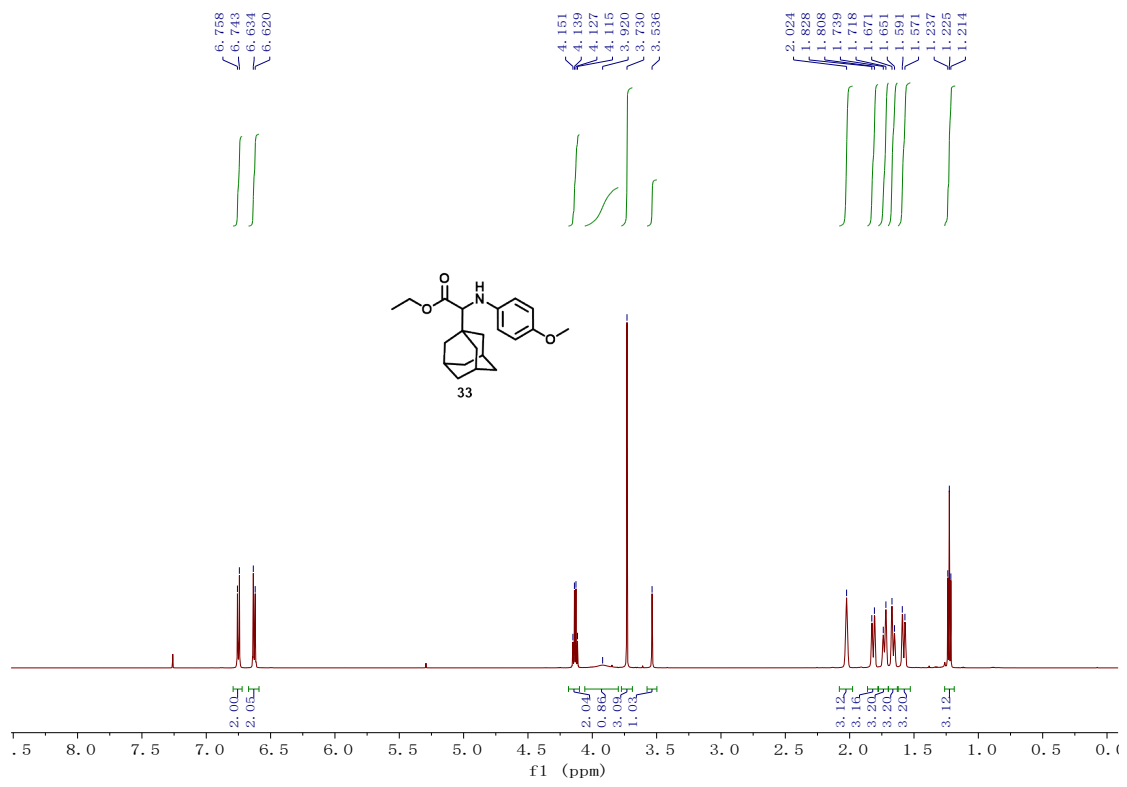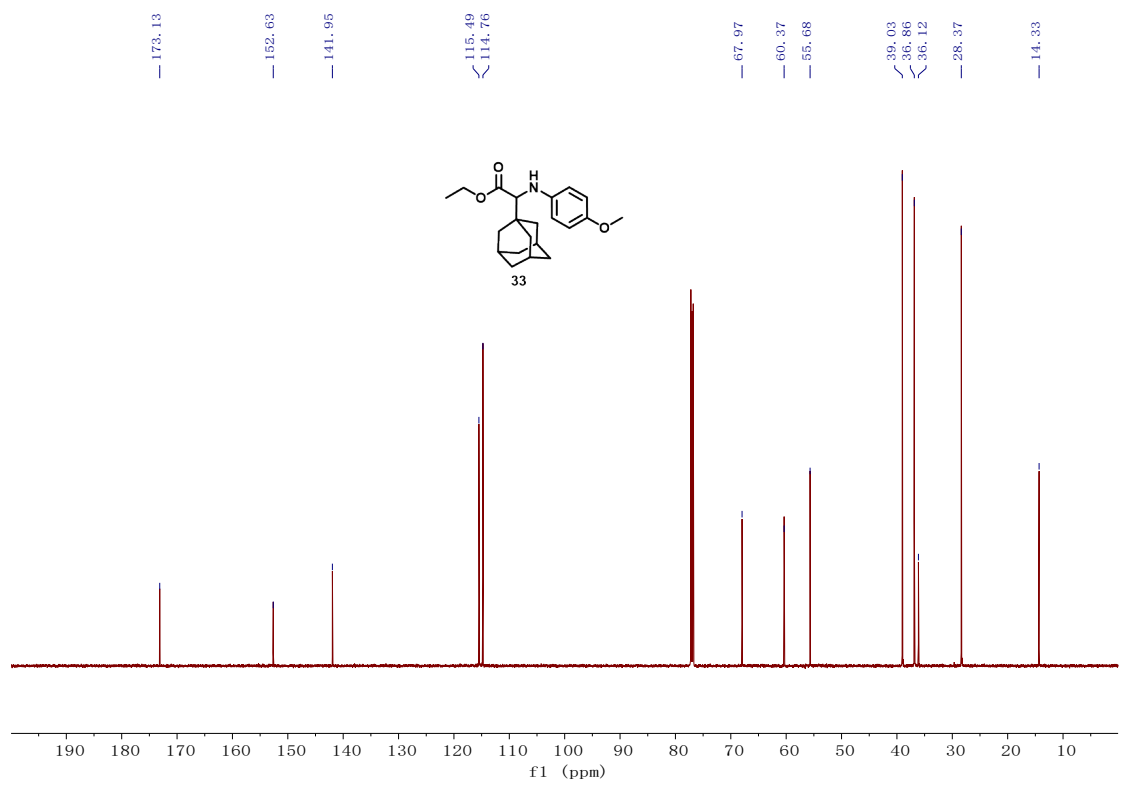

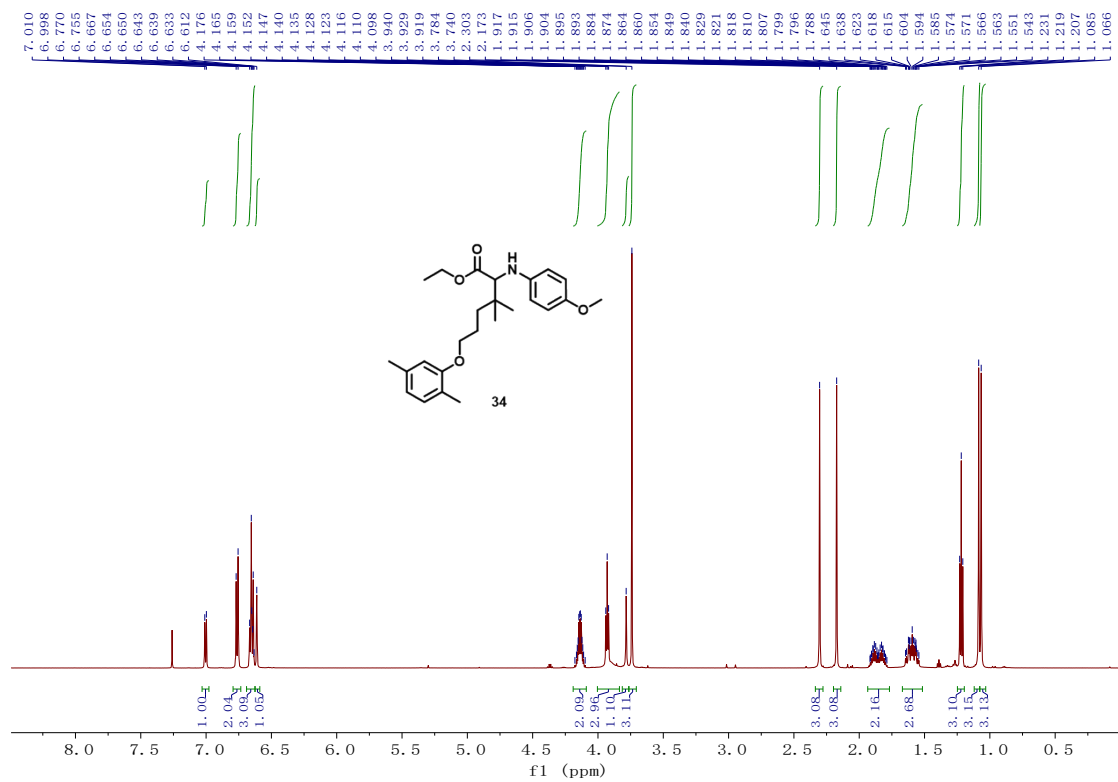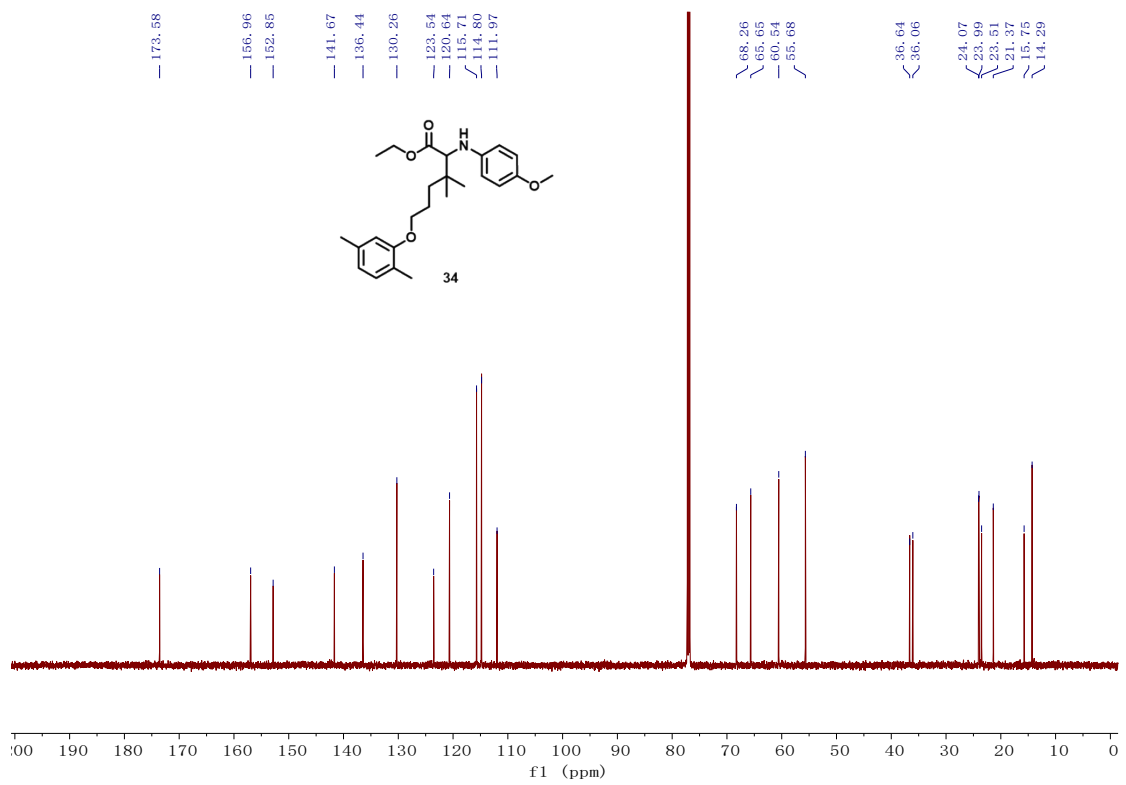

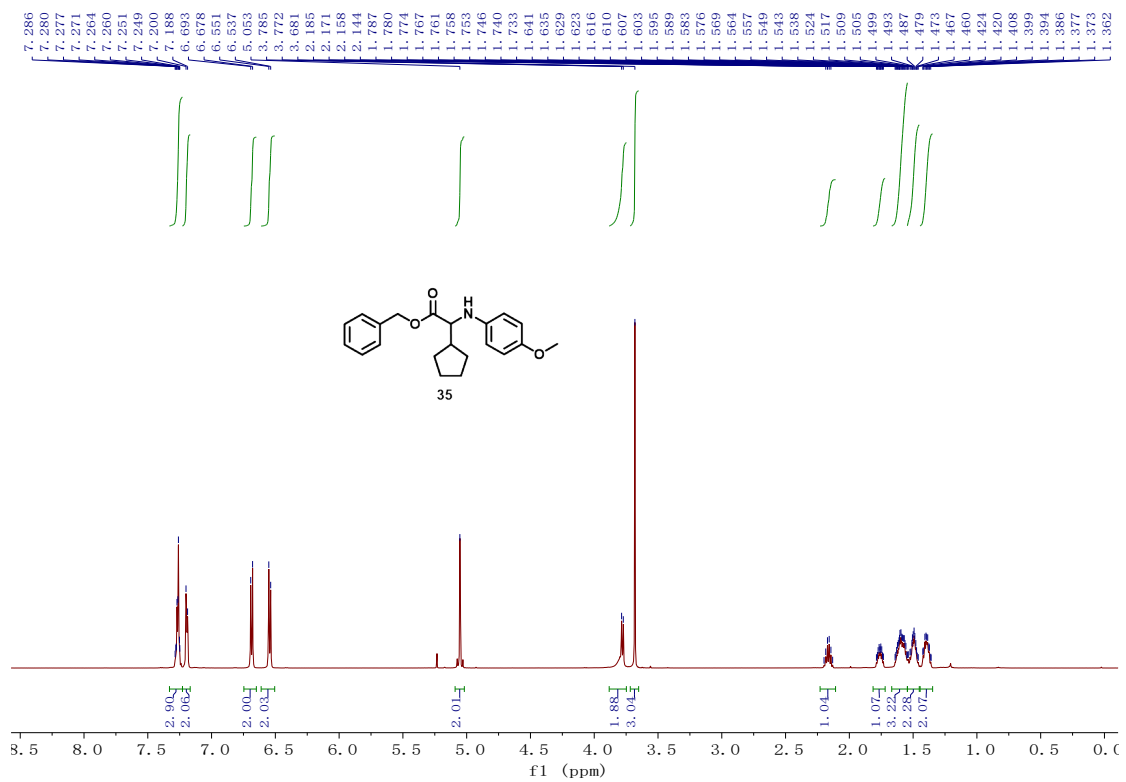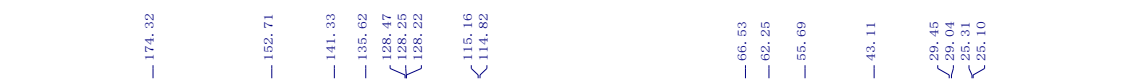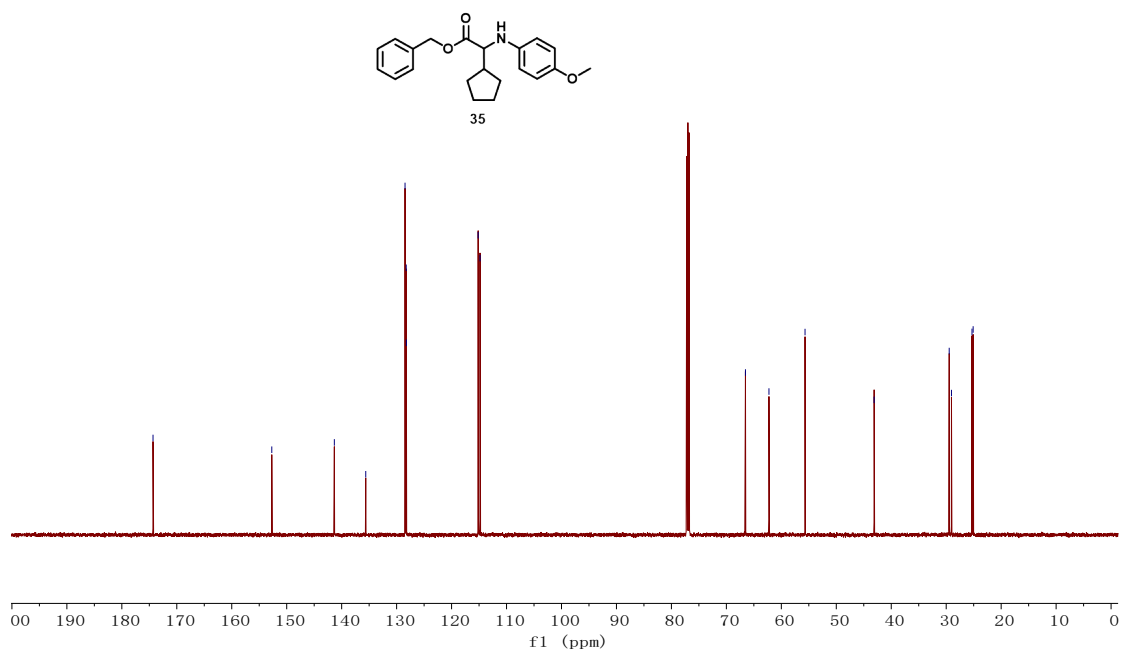



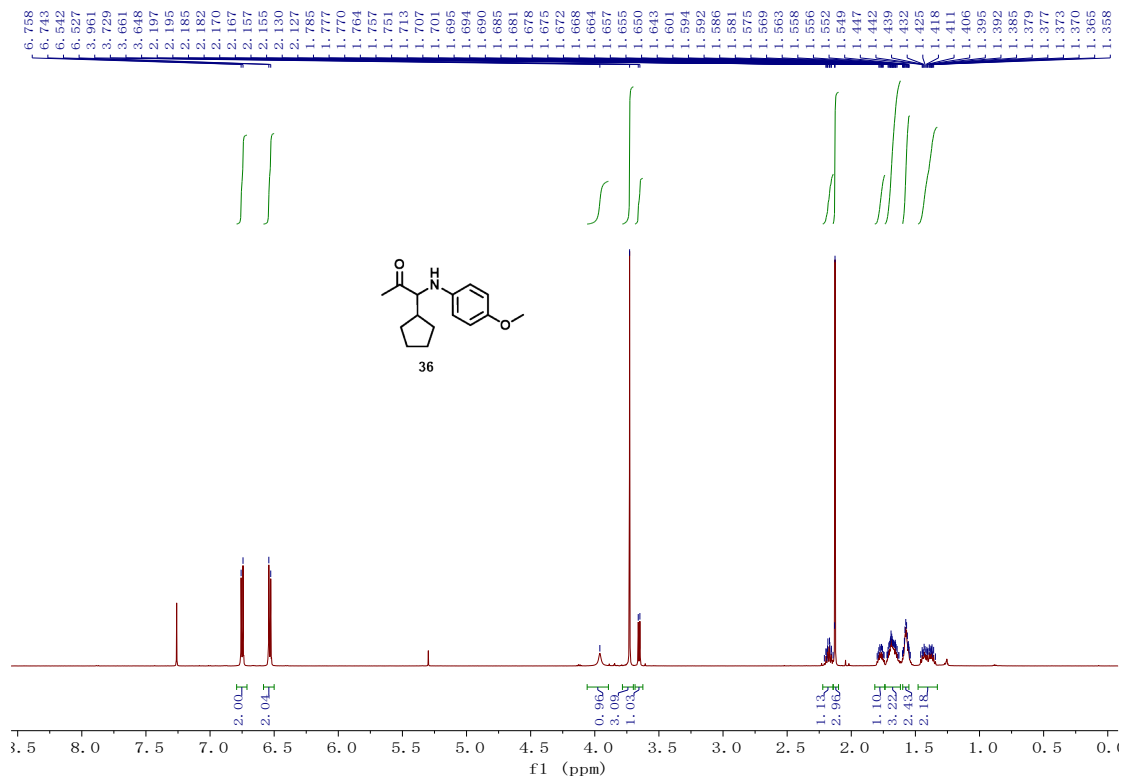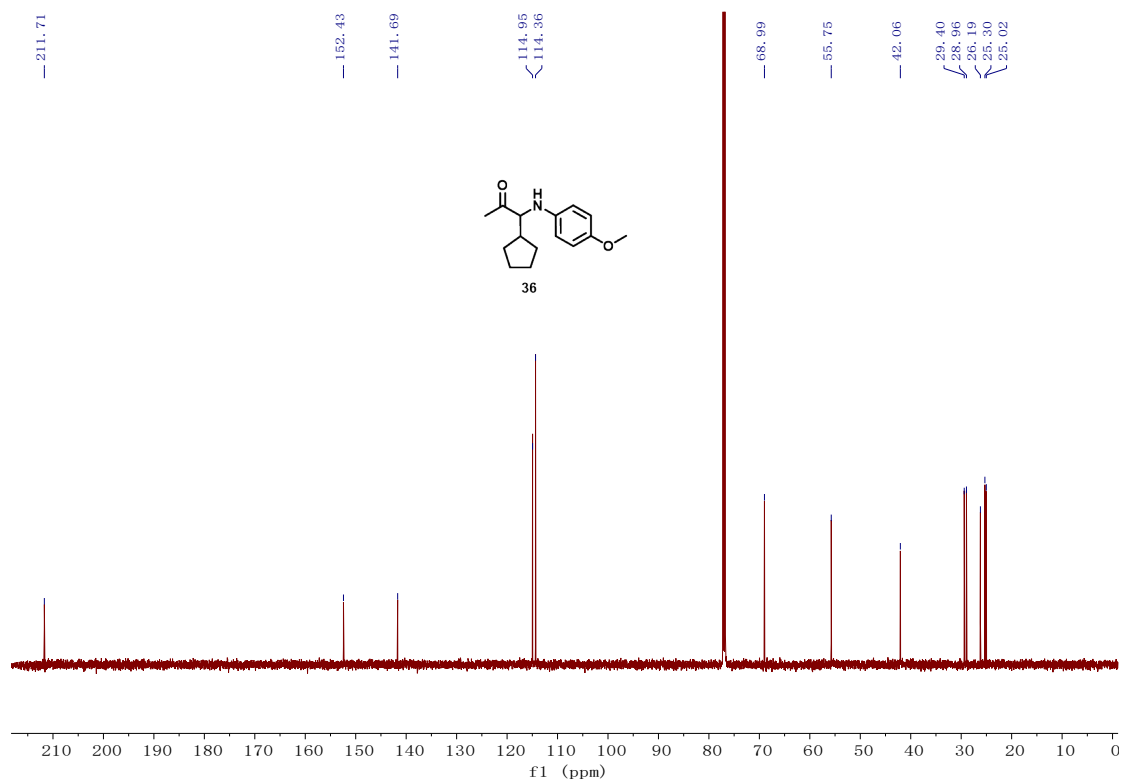

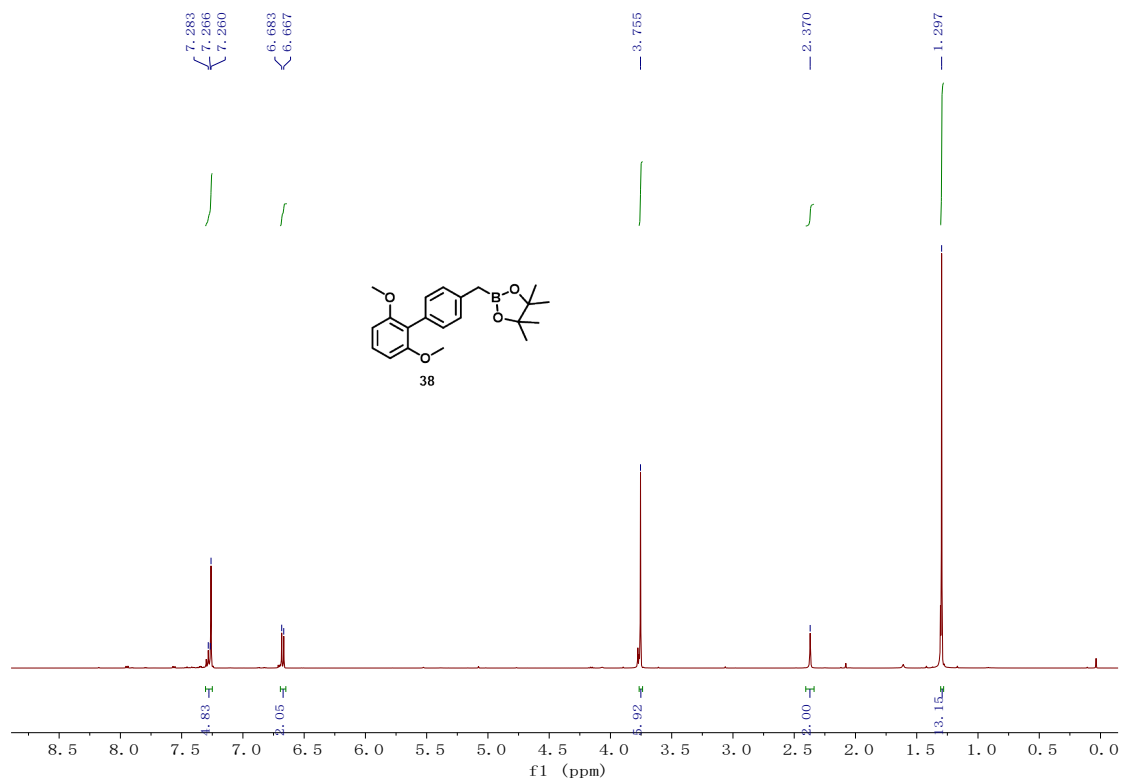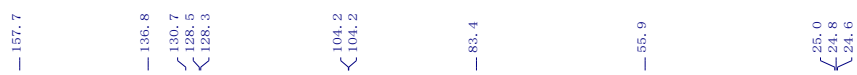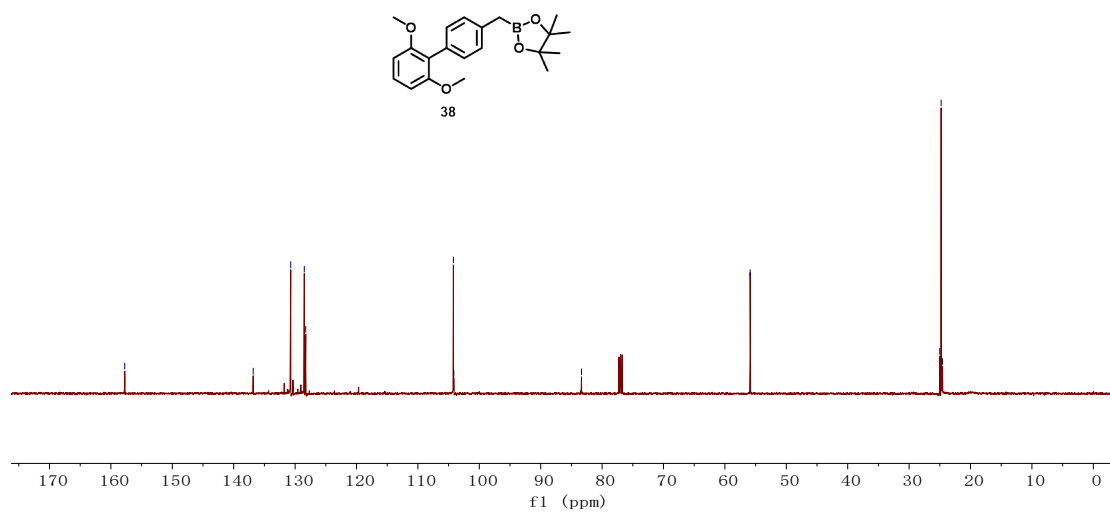

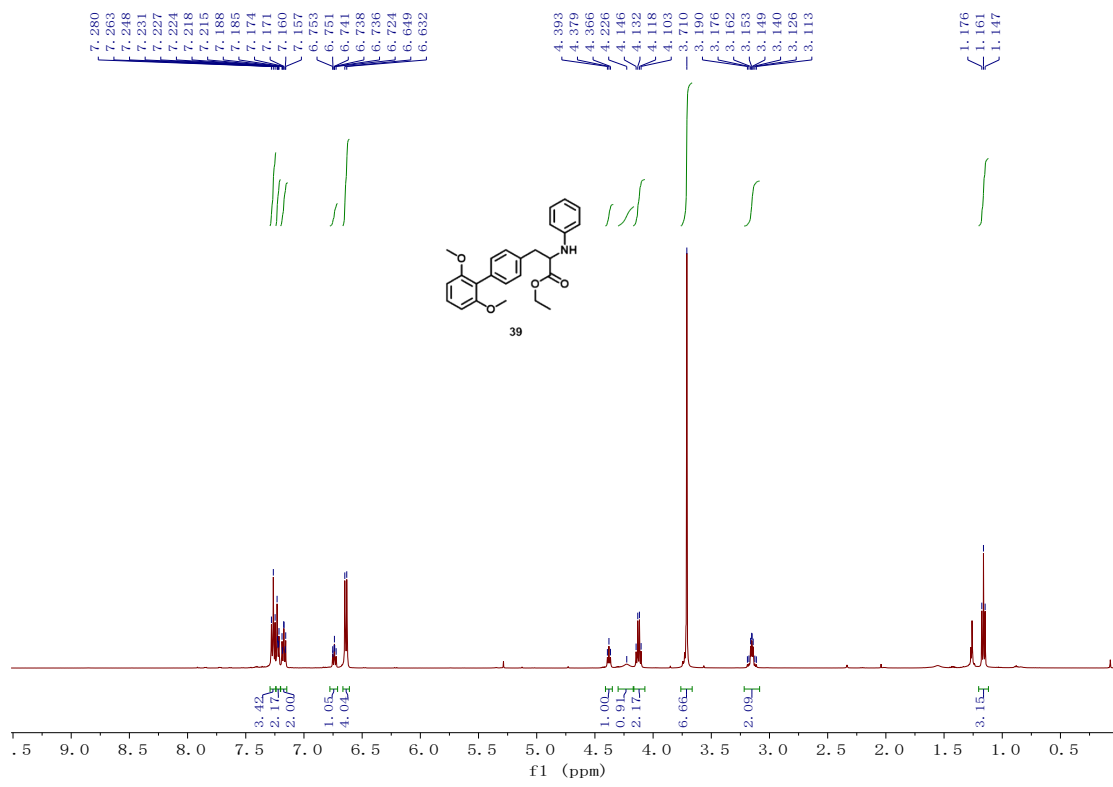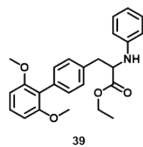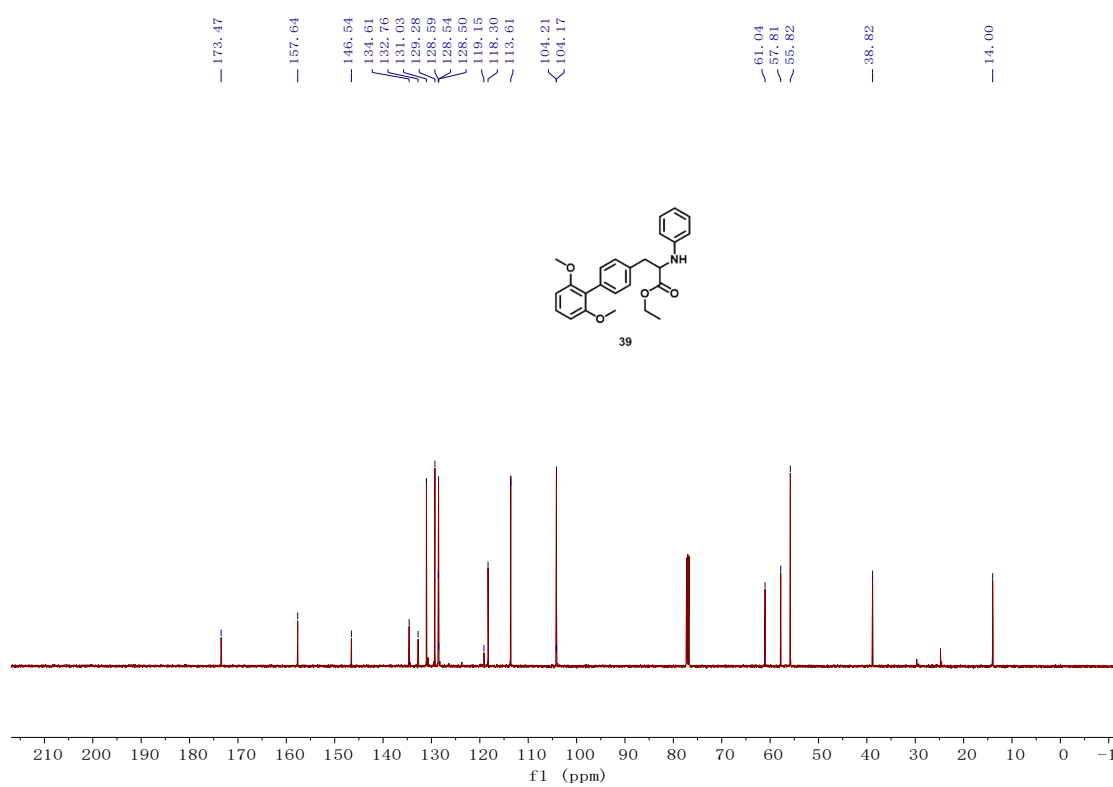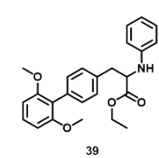

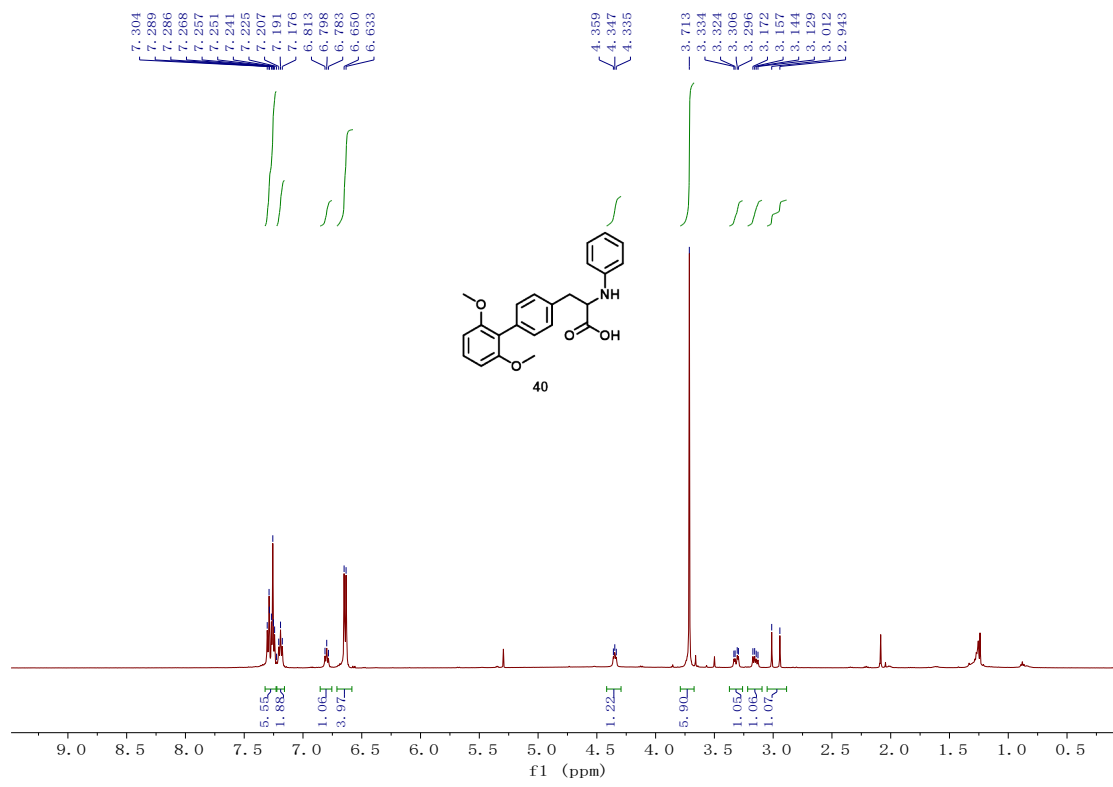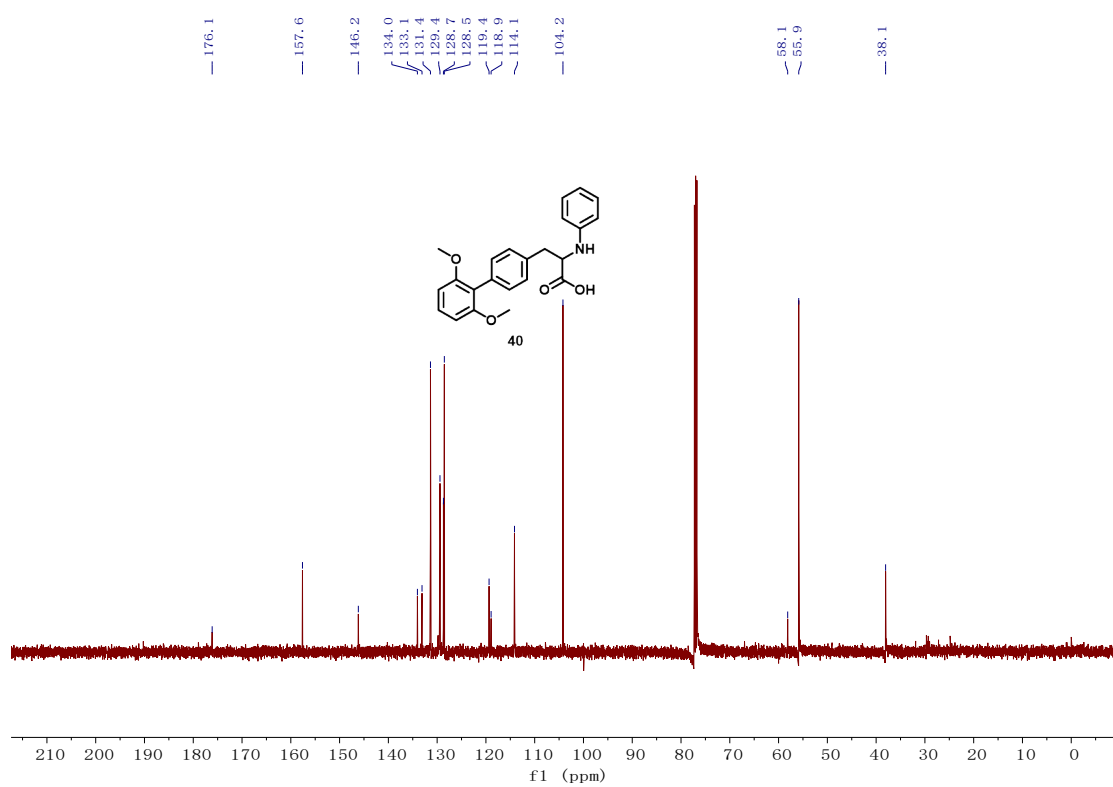

## REFERENCES

1. Yi, J.; Badir, S. O.; Alam, R.; Molander, G. A. *Org. Lett.* **2019**, *21*, 4853-4858.
2. Campbell, M. W.; Compton, J. S.; Kelly, C. B.; Molander, G. A. *J. Am. Chem. Soc.* **2019**, *141*, 20069-20078.
3. Huang, W.; Keess, S.; Molander, G. A. *J. Am. Chem. Soc.* **2022**, *144*, 12961-12969.
4. Manthou, V. S.; Perganti, D.; Rotas, G.; Falaras, P.; Vougioukalakis, G. C. *Synlett* **2017**, *28*, 929-933.
5. Huang, H.; Zhang, G.; Gong, L.; Zhang, S.; Chen, Y. *J. Am. Chem. Soc.* **2014**, *136*, 2280-2283.
6. Zhou, S.; Lv, K.; Fu, R.; Zhu, C.; Bao, X. *ACS Catal.* **2021**, *11*, 5026-5034.
7. Yan, H.; Hou, Z. W.; Xu, H. C. *Angew. Chem. Int. Ed.* **2019**, *58*, 4592-4595.
